# Supplementary material for: Genetic Dissection of Alkalinity Tolerance at the Seedling Stage in Rice (Oryza sativa) Using a High-Resolution Linkage Map
Source: MDPI journal article supplement (doi:10.3390/plants11233347), 2022-12-02
Supplement: s1 [file s1]

**A**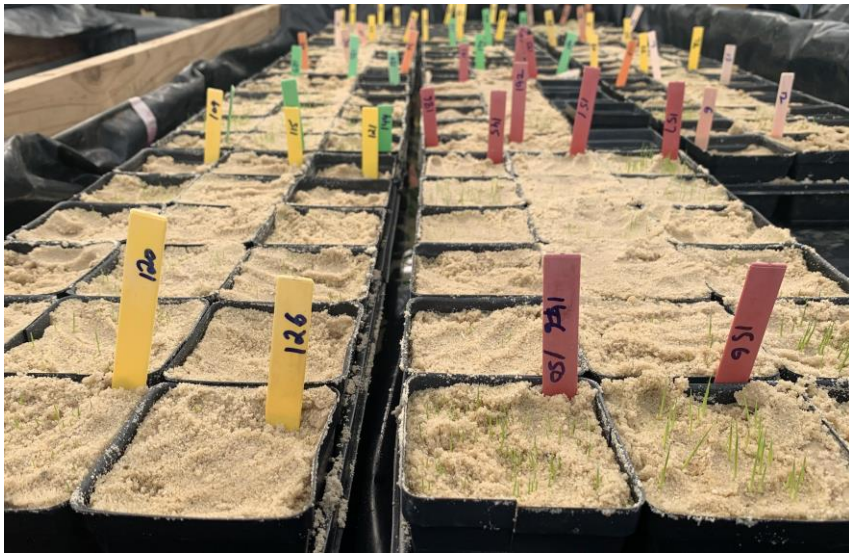**B**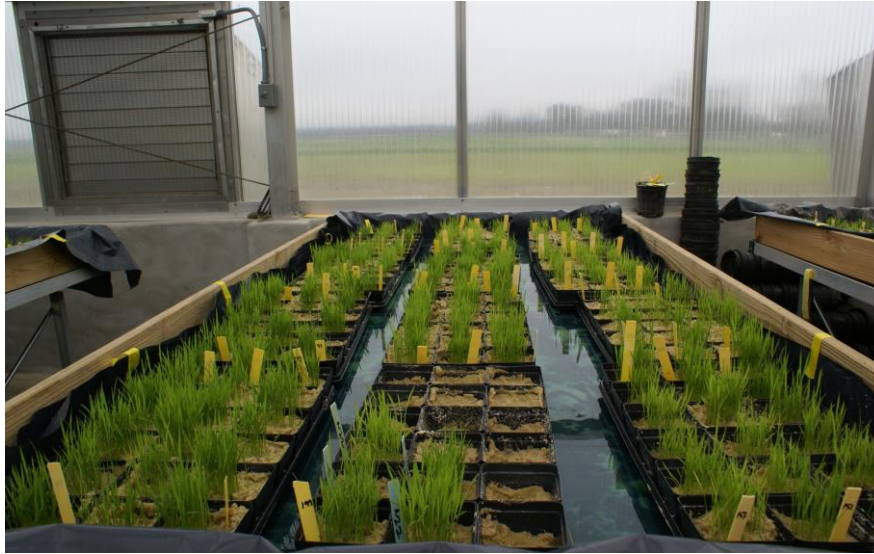**C**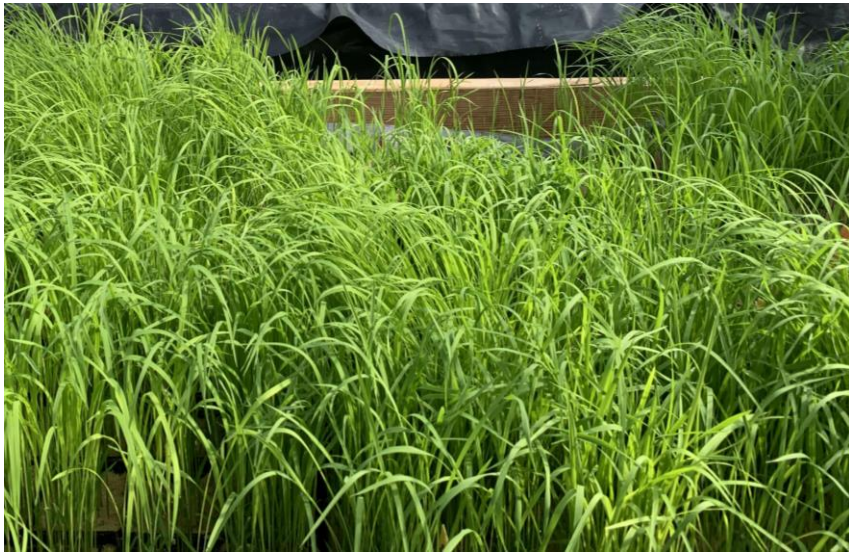**D**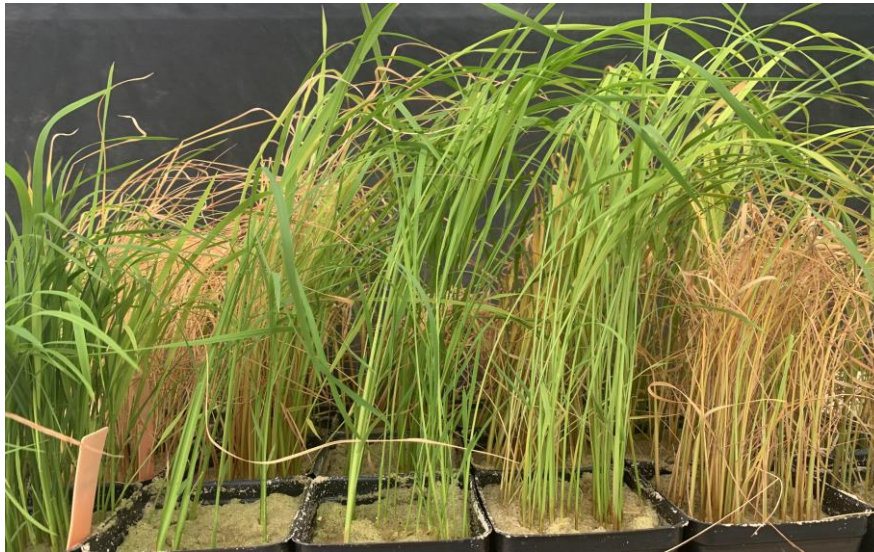

**Figure S2.** Alkalinity tolerance screening of RIL mapping population and parents in sand culture in the greenhouse experiment. A - Experimental setup for alkalinity stress screening at the seedling stage; B - one week old seedlings after germination; C - Performance of RILs under control experiment; D - Performance of RILs after 2 weeks of exposure to alkalinity stress.
