# Supplementary material for: Genetic Dissection of Alkalinity Tolerance at the Seedling Stage in Rice (Oryza sativa) Using a High-Resolution Linkage Map
Source: MDPI journal article supplement (doi:10.3390/plants11233347), 2022-12-02
Supplement: s1 [file s1]

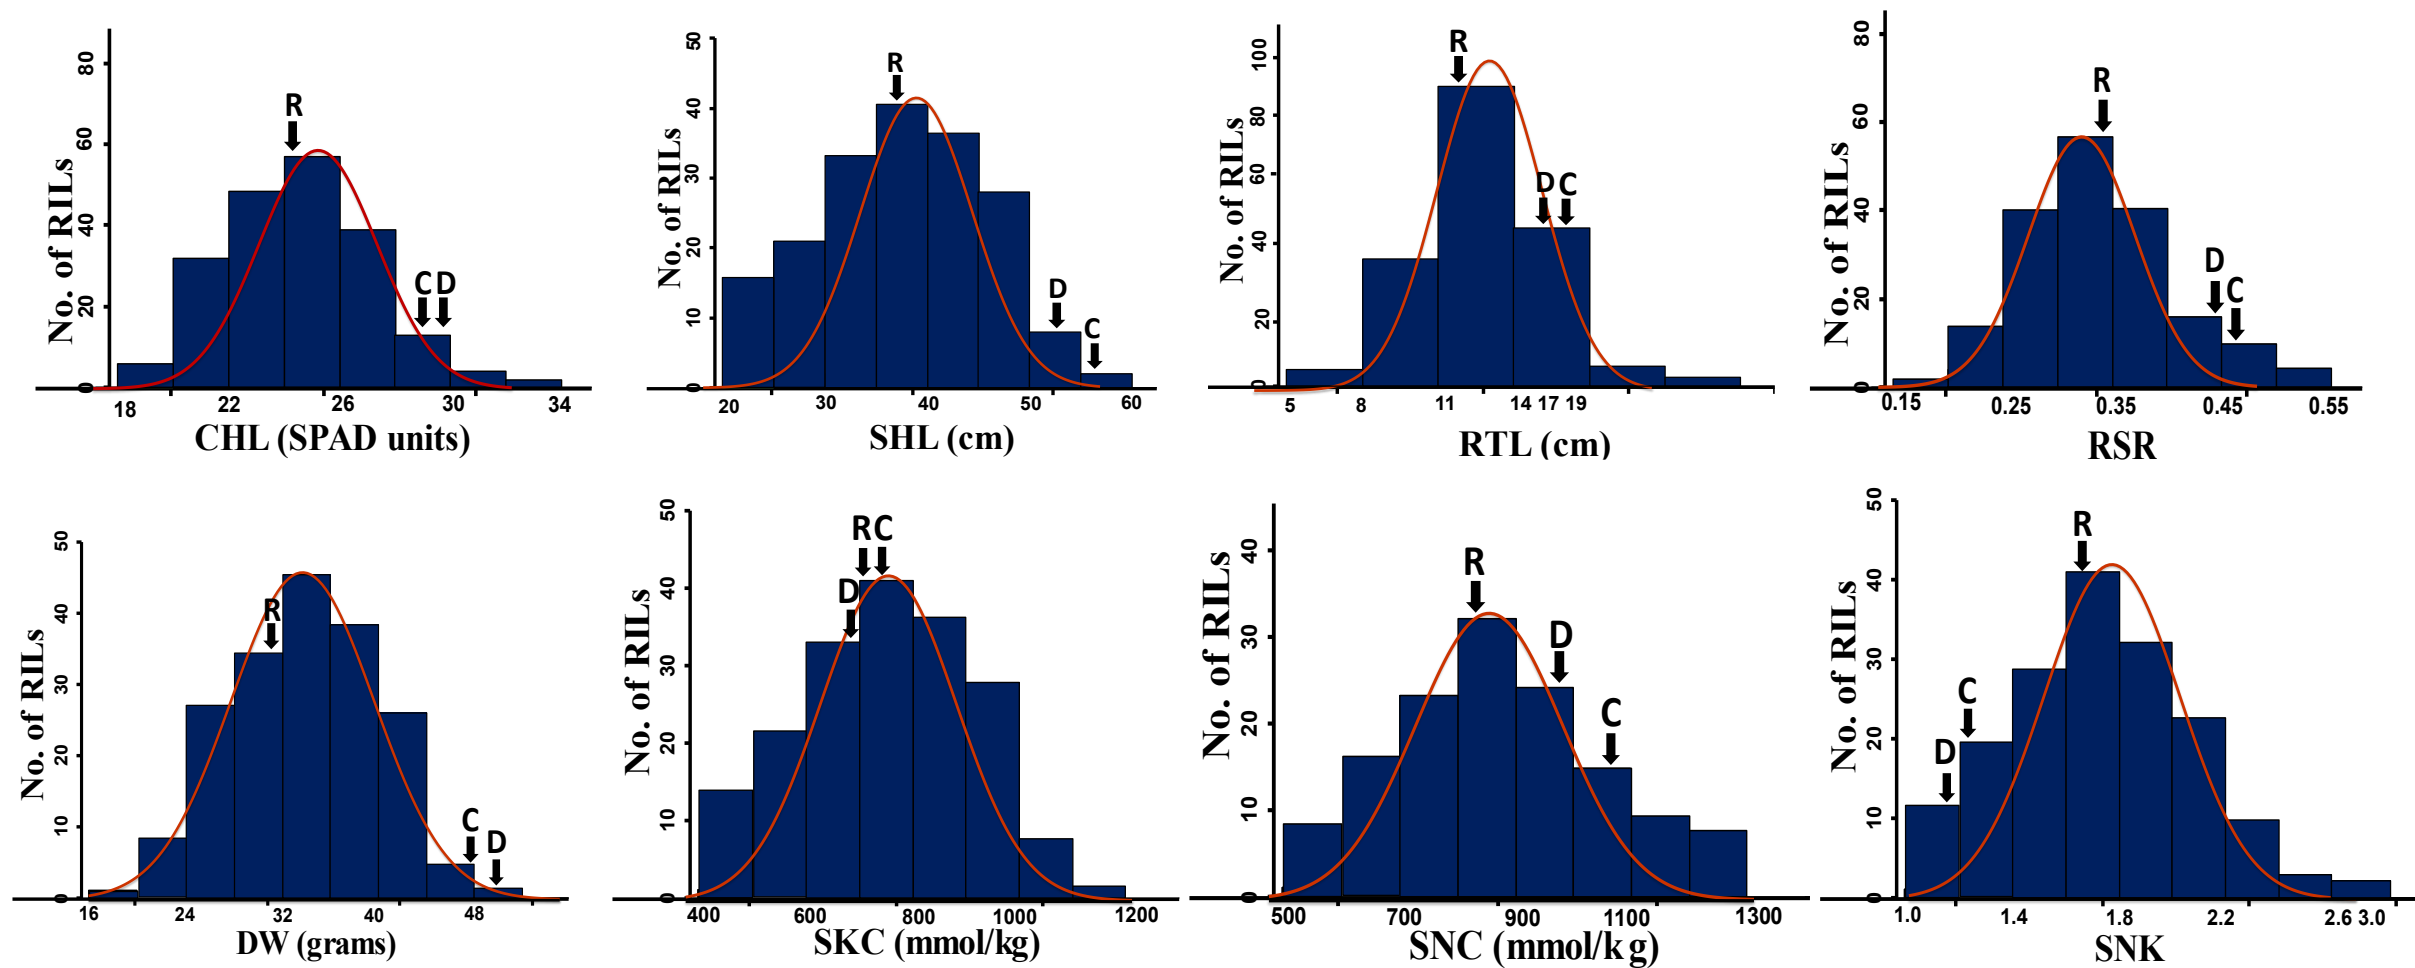

**Figure S1.** Frequency distribution of various morphological and physiological traits of Cocodrie x Dular RILs under a control condition at the seedling stage with arrowheads indicating the trait means of Cocodrie (C), Dular (D), and RIL population (R). CHL – chlorophyll content; SHL – shoot length; RTL – root length; RSR – root to shoot ratio; DW – shoot dry weight; SKC – shoot  $K^+$  concentration; SNC – shoot  $Na^+$  concentration; SNK – shoot  $Na^+:K^+$  ratio.
