# Supplementary material for: Genetic Dissection of Alkalinity Tolerance at the Seedling Stage in Rice (Oryza sativa) Using a High-Resolution Linkage Map
Source: MDPI journal article supplement (doi:10.3390/plants11233347), 2022-12-02
Supplement: s1 [file s1]

**Table S2.** Additive QTLs for physiological and morphological traits under control environment at seedling stage identified by ICIM method in Cocodrie x Dular RIL population

| Trait <sup>a</sup> | QTL <sup>b</sup>  | Chr | Left_Marker  | Right_Marker | LOD <sup>c</sup> | PVE (%) <sup>d</sup> | Additive effect | Increasing allele effect |
|--------------------|-------------------|-----|--------------|--------------|------------------|----------------------|-----------------|--------------------------|
| CHL                | <i>qCHL3.35</i>   | 3   | S3_35332218  | S3_35570746  | 2.2188           | 2.8087               | -27.555         | Dular                    |
|                    | <i>qCHL7.01</i>   | 7   | S7_1101600   | S7_1144731   | 20.3266          | 36.4626              | 10.6729         | Cocodrie                 |
| SHL                | <i>qSHL1.03</i>   | 1   | S1_3665789   | S1_3708821   | 21.7107          | 38.0288              | 10.5115         | Cocodrie                 |
|                    | <i>qSHL2.25</i>   | 2   | S2_25044454  | S2_25045214  | 2.2189           | 2.809                | -38.0441        | Dular                    |
|                    | <i>qSHL4.31</i>   | 4   | S4_31716088  | S4_31775328  | 5.3272           | 7.4501               | 2.2043          | Cocodrie                 |
|                    | <i>qSHL5.25</i>   | 5   | S5_25515196  | S5_25687880  | 5.3273           | 7.4504               | 44.0864         | Cocodrie                 |
|                    | <i>qSHL9.18</i>   | 9   | S9_18208683  | S9_18332939  | 7.8913           | 16.9238              | -0.0346         | Dular                    |
|                    | <i>qSHL12.16</i>  | 12  | S12_16498758 | S12_16498772 | 5.3271           | 7.4503               | 55.1081         | Cocodrie                 |
| RTL                | <i>qRTL10.10</i>  | 10  | S10_10182742 | S10_10329302 | 3.0981           | 7.9091               | 0.4725          | Cocodrie                 |
|                    | <i>qRTL12.05</i>  | 12  | S12_5751404  | S12_6224392  | 2.9213           | 8.1571               | 0.4751          | Cocodrie                 |
| RSR                | <i>qRSR1.28</i>   | 1   | S1_28526959  | S1_28526967  | 2.6652           | 3.7663               | 31.4875         | Cocodrie                 |
|                    | <i>qRSR6.13</i>   | 6   | S6_13805365  | S6_14333027  | 21.7108          | 38.0285              | 5.0256          | Cocodrie                 |
| SNC                | <i>qSNC1.34</i>   | 1   | S1_34605734  | S1_34643510  | 2.0684           | 2.9119               | 34.3716         | Dular                    |
|                    | <i>qSNC3.10</i>   | 3   | S3_10549867  | S3_10676606  | 2.0684           | 2.9111               | 27.4933         | Dular                    |
|                    | <i>qSNC9.22</i>   | 9   | S9_22504186  | S9_22504216  | 2.7844           | 5.3441               | 0.0193          | Dular                    |
|                    | <i>qSNC12.01</i>  | 12  | S12_1055785  | S12_1055788  | 2.6651           | 3.7664               | 39.3592         | Dular                    |
|                    | <i>qSNC12.24</i>  | 12  | S12_24823703 | S12_24823709 | 2.6652           | 3.7659               | 1.5744          | Dular                    |
| SKC                | <i>qSKC2.30</i>   | 2   | S2_30952914  | S2_30823340  | 2.2187           | 2.8089               | -1.9022         | Cocodrie                 |
|                    | <i>qSKC2.03</i>   | 2   | S2_3263428   | S2_4408126   | 21.7108          | 21.0284              | -125.6393       | Cocodrie                 |
|                    | <i>qSKC4.33</i>   | 4   | S4_33881790  | S4_33875971  | 2.6652           | 3.7663               | -31.4875        | Cocodrie                 |
|                    | <i>qSKC5.02</i>   | 5   | S5_2831482   | S5_3374773   | 2.0236           | 4.7419               | -0.3623         | Cocodrie                 |
|                    | <i>qSKC10.004</i> | 10  | S10_460111   | S10_584084   | 2.0684           | 2.9123               | -1.3749         | Cocodrie                 |
| SNK                | <i>qSNK1.14</i>   | 1   | S1_14938489  | S1_15440503  | 5.7533           | 8.4379               | -52.2813        | Cocodrie                 |
|                    | <i>qSNK7.05</i>   | 7   | S7_5062144   | S7_5182685   | 15.8854          | 12.1423              | 11.7262         | Dular                    |
|                    | <i>qSNK9.19</i>   | 9   | S9_19167572  | S9_19175157  | 2.1118           | 3.082                | 31.7373         | Dular                    |
|                    | <i>qSNK9.11</i>   | 9   | S9_11236368  | S9_11348590  | 2.0627           | 2.7287               | -41.7847        | Cocodrie                 |

<sup>a</sup>CHL, chlorophyll content; SHL, shoot length; RTL, root length; RSR, root to shoot ratio; SNC, shoot Na<sup>+</sup> concentration; SKC, shoot K<sup>+</sup> concentration.; SNK, shoot Na<sup>+</sup>:K<sup>+</sup> ratio

<sup>b</sup>*qCHL*, *qSHL*, *qRTL*, *qRSR*, *qSNC*, *qSKC*, *qSNK* correspond to QTLs for chlorophyll content, shoot length, root length, root to shoot ratio, shoot Na<sup>+</sup> concentration, shoot K<sup>+</sup> concentration, and shoot Na<sup>+</sup>:K<sup>+</sup> ratio, respectively. The number before the decimal represent the chromosome number and the number after the decimal indicate the physical position of the QTLs in mega base pair.

<sup>c</sup>LOD, logarithm of odds

<sup>d</sup>PVE (%), percentage phenotypic variance explained by the QTL
