# Supplementary material for: Genetic Dissection of Alkalinity Tolerance at the Seedling Stage in Rice (Oryza sativa) Using a High-Resolution Linkage Map
Source: MDPI journal article supplement (doi:10.3390/plants11233347), 2022-12-02
Supplement: s1 [file s1]

**Table S1.** Mean values for various morpho-physiological traits at the seedling stage under control environment in Cocodrie x Dular RIL population

| Traits <sup>a</sup>         | Cocodrie Mean | Dular Mean <sup>b</sup> | RIL Mean | Heritability |
|-----------------------------|---------------|-------------------------|----------|--------------|
| SNC (mmolkg <sup>-1</sup> ) | 1225.38       | 1039.29 <sup>ns</sup>   | 1301.56  | 0.84         |
| SKC (mmolkg <sup>-1</sup> ) | 738.27        | 673.72 <sup>ns</sup>    | 692.53   | 0.93         |
| SNK (ratio)                 | 1.26          | 0.98 <sup>ns</sup>      | 1.17     | 0.68         |
| AKT                         | 1             | 1 <sup>ns</sup>         | 1.7      | 0.94         |
| log_CHL                     | 1.57          | 1.53 <sup>ns</sup>      | 1.56     | 0.87         |
| log_SHL                     | 1.55          | 1.53 <sup>ns</sup>      | 1.51     | 0.83         |
| RTL (cm)                    | 16.9          | 16.2 <sup>ns</sup>      | 17.63    | 0.89         |
| DW (g)                      | 48.3          | 50.1 <sup>ns</sup>      | 52.87    | 0.92         |
| RSR (ratio)                 | 0.51          | 0.48 <sup>ns</sup>      | 0.47     | 0.81         |

<sup>a</sup>

<sup>a</sup>SNC, shoot Na<sup>+</sup> concentration; SKC, shoot K<sup>+</sup> concentration; SNK, shoot Na<sup>+</sup>:K<sup>+</sup> ratio; AKT, alkalinity tolerance score; log\_CHL, log chlorophyll content; log\_SHL, log shoot length; RTL, root length; DW, Dry weight; RSR, root to shoot ratio

<sup>b</sup>t-test between Cocodrie and Dular; <sup>ns</sup> Nonsignificant
