# Supplementary material for: Genetic Dissection of Alkalinity Tolerance at the Seedling Stage in Rice (Oryza sativa) Using a High-Resolution Linkage Map
Source: Plants (Basel). 2022 Dec 2;11(23):3347. doi: 10.3390/plants11233347 (PMC9738157; doi:10.3390/plants11233347)
Supplement: Supplementary file 1 [file plants-11-03347-s001.zip]

Archive with 8 entries (8 files):
- Supplementary Figure S1.pdf
- Supplementary Figure S2.pdf
- Table S1.pdf
- Table S2.pdf
- Table S3.xlsx
- Table S4.xlsx
- Table S5.xlsx
- Table S6.xlsx
