# Supplementary material for: Genetic Dissection of Alkalinity Tolerance at the Seedling Stage in Rice (Oryza sativa) Using a High-Resolution Linkage Map
Source: Plants (Basel). 2022 Dec 2;11(23):3347. doi: 10.3390/plants11233347 (PMC9738157; doi:10.3390/plants11233347)
Supplement: Supplementary file 1 [file plants-11-03347-s001.zip › Table S3.xlsx]

## Sheet: Table S3
Table S3. List of genes present in QTL intervals of alkalinity tolerance traits
QTL	Chr	Start (bp)	Stop (bp)	Locus Id	Gene Annotation by MSU rice release 7
qAKT8.02	8	2389044	3753000	LOC_Os08g04790	xylosyltransferase, putative, expressed
				LOC_Os08g04800	triacylglycerol lipase like protein, putative, expressed
				LOC_Os08g04810	serine esterase family protein, putative, expressed
				LOC_Os08g04830	expressed protein
				LOC_Os08g04840	MYB family transcription factor, putative, expressed
				LOC_Os08g04850	transposon protein, putative, CACTA, En/Spm sub-class, expressed
				LOC_Os08g04870	transposon protein, putative, CACTA, En/Spm sub-class, expressed
				LOC_Os08g04890	OsCML32 - Calmodulin-related calcium sensor protein, expressed
				LOC_Os08g04900	hypothetical protein
				LOC_Os08g04910	expressed protein
				LOC_Os08g04920	OsDegp11 - Putative Deg protease homologue, expressed
				LOC_Os08g05020	expressed protein
				LOC_Os08g05030	expressed protein
				LOC_Os08g05040	expressed protein
				LOC_Os08g05050	expressed protein
				LOC_Os08g05070	translation initiation factor IF-2, putative, expressed
				LOC_Os08g05080	expressed protein
				LOC_Os08g05090	expressed protein
				LOC_Os08g05100	expressed protein
				LOC_Os08g05110	expressed protein
				LOC_Os08g05130	retrotransposon protein, putative, Ty3-gypsy subclass
				LOC_Os08g05140	expressed protein
				LOC_Os08g05160	expressed protein
				LOC_Os08g05250	retrotransposon protein, putative, Ty3-gypsy subclass, expressed
				LOC_Os08g05280	oxidoreductase family, NAD-binding Rossmann fold containing protein, expressed
				LOC_Os08g05290	receptor-like protein kinase 5 precursor, putative, expressed
				LOC_Os08g05300	expressed protein
				LOC_Os08g05310	expressed protein
				LOC_Os08g05320	expressed protein
				LOC_Os08g05330	expressed protein
				LOC_Os08g05340	expressed protein
				LOC_Os08g05370	conserved hypothetical protein
				LOC_Os08g05380	expressed protein
				LOC_Os08g05390	transposon protein, putative, CACTA, En/Spm sub-class, expressed
				LOC_Os08g05410	expressed protein
				LOC_Os08g05430	transposon protein, putative, CACTA, En/Spm sub-class, expressed
				LOC_Os08g05440	NB-ARC domain containing protein, expressed
				LOC_Os08g05460	OsFBL40 - F-box domain and LRR containing protein, expressed
				LOC_Os08g05470	expressed protein
				LOC_Os08g05480	OsFBX261 - F-box domain containing protein, expressed
				LOC_Os08g05490	tRNA synthetase, putative, expressed
				LOC_Os08g05510	MYB family transcription factor, putative, expressed
				LOC_Os08g05520	myb-like DNA-binding domain containing protein, putative, expressed
				LOC_Os08g05530	LSM domain containing protein, expressed
				LOC_Os08g05540	expressed protein
				LOC_Os08g05550	expressed protein
				LOC_Os08g05560	zinc finger, C3HC4 type domain containing protein, expressed
				LOC_Os08g05570	monodehydroascorbate reductase, putative, expressed
				LOC_Os08g05580	aquaporin protein, putative, expressed
				LOC_Os08g05590	aquaporin protein, putative, expressed
				LOC_Os08g05600	aquaporin protein, putative, expressed
				LOC_Os08g05610	cytochrome P450, putative, expressed
				LOC_Os08g05620	cytochrome P450, putative, expressed
				LOC_Os08g05630	expressed protein
				LOC_Os08g05640	DUF1336 domain containing protein, expressed
				LOC_Os08g05650	diacylglycerol kinase, putative, expressed
				LOC_Os08g05660	expressed protein
				LOC_Os08g05670	HEAT repeat family protein, putative, expressed
				LOC_Os08g05680	expressed protein
				LOC_Os08g05690	ABC transporter, ATP-binding protein, putative, expressed
				LOC_Os08g05700	expressed protein
				LOC_Os08g05710	ABC transporter, ATP-binding protein, putative, expressed
				LOC_Os08g05720	integral membrane protein, putative, expressed
				LOC_Os08g05750	pentatricopeptide, putative, expressed
				LOC_Os08g05770	expressed protein
				LOC_Os08g05780	expressed protein
				LOC_Os08g05790	caffeoyl-CoA O-methyltransferase, putative, expressed
				LOC_Os08g05810	DEAD-box ATP-dependent RNA helicase, putative, expressed
				LOC_Os08g05820	monocopper oxidase, putative, expressed
				LOC_Os08g05830	transaldolase, putative, expressed
				LOC_Os08g05840	DNA topoisomerase 1, putative, expressed
				LOC_Os08g05860	expressed protein
				LOC_Os08g05870	oxysterol-binding protein-related protein 6, putative, expressed
				LOC_Os08g05880	Brix domain containing protein, putative, expressed
				LOC_Os08g05890	MSP domain containing protein, expressed
				LOC_Os08g05900	expressed protein
				LOC_Os08g05910	peptide transporter PTR2, putative, expressed
				LOC_Os08g05950	expressed protein
				LOC_Os08g05960	expressed protein
				LOC_Os08g05970	expressed protein
				LOC_Os08g05980	expressed protein
				LOC_Os08g06000	hypothetical protein
				LOC_Os08g06010	transporter, major facilitator family, putative, expressed
				LOC_Os08g06020	MSP domain containing protein, expressed
				LOC_Os08g06040	60S ribosomal protein L34, putative, expressed
				LOC_Os08g06050	OsTOP6A2 - Topoisomerase 6 subunit A homolog 2, expressed
				LOC_Os08g06060	CGMC_MAPKCMGC_2_ERK.13 - CGMC includes CDA, MAPK, GSK3, and CLKC kinases, expressed
				LOC_Os08g06070	ELF7, putative, expressed
				LOC_Os08g06090	zinc finger, C3HC4 type domain containing protein, expressed
				LOC_Os08g06100	O-methyltransferase, putative, expressed
				LOC_Os08g06110	MYB family transcription factor, putative, expressed
				LOC_Os08g06120	B3 DNA binding domain containing protein, expressed
				LOC_Os08g06130	expressed protein
				LOC_Os08g06140	no apical meristem protein, putative, expressed
				LOC_Os08g06170	berberine and berberine like domain containing protein, expressed
				LOC_Os08g06180	reticuline oxidase precursor, putative
				LOC_Os08g06190	berberine and berberine like domain containing protein, expressed
				LOC_Os08g06200	stomatin-like protein 2, putative, expressed
				LOC_Os08g06210	expressed protein
				LOC_Os08g06220	transferase, putative, expressed
				LOC_Os08g06230	nucleolar GTP-binding protein 1, putative, expressed
				LOC_Os08g06240	MYB family transcription factor, putative, expressed
				LOC_Os08g06250	tetraspanin family protein, putative, expressed
				LOC_Os08g06260	hypothetical protein
				LOC_Os08g06270	expressed protein
				LOC_Os08g06280	LSD1 zinc finger domain containing protein, expressed
				LOC_Os08g06290	expressed protein
				LOC_Os08g06320	DNA binding protein, putative, expressed
				LOC_Os08g06330	zinc finger C-x8-C-x5-C-x3-H type family protein, expressed
				LOC_Os08g06344	transposon protein, putative, CACTA, En/Spm sub-class, expressed
				LOC_Os08g06360	THO complex subunit 7, putative, expressed
				LOC_Os08g06370	MYB family transcription factor, putative, expressed
				LOC_Os08g06380	CSLF6 - cellulose synthase-like family F; beta1,3;1,4 glucan synthase, expressed
				LOC_Os08g06390	expressed protein
				LOC_Os08g06400	hypothetical protein
				LOC_Os08g06410	expressed protein
				LOC_Os08g06415	expressed protein
				LOC_Os08g06420	abhydrolase domain-containing protein FAM108C1, putative, expressed
				LOC_Os08g06430	mitochondrial NADH-ubiquinone oxidoreductase, putative, expressed
				LOC_Os08g06440	secretory carrier-associated membrane protein 5, putative, expressed
				LOC_Os08g06450	cytidylyltransferase domain containing protein, expressed
				LOC_Os08g06460	dnaJ domain containing protein, expressed
				LOC_Os08g06470	transmembrane 9 superfamily member, putative, expressed
				LOC_Os08g06474	ribosomal protein L13, putative, expressed
				LOC_Os08g06478	expressed protein
				LOC_Os08g06480	lissencephaly type-1-like homology motif, putative, expressed
				LOC_Os08g06490	pentatricopeptide, putative, expressed
				LOC_Os08g06500	PPR repeat domain containing protein, putative, expressed
				LOC_Os08g06510	zinc finger, C3HC4 type domain containing protein, expressed
				LOC_Os08g06520	expressed protein
				LOC_Os08g06530	rubredoxin family protein, putative, expressed
				LOC_Os08g06540	expressed protein
				LOC_Os08g06550	acyl CoA binding protein, putative, expressed
				LOC_Os08g06560	ribosomal protein L13, putative, expressed
				LOC_Os08g06590	expressed protein
				LOC_Os08g06600	nuf2 family protein, expressed
				LOC_Os08g06610	mps one binder kinase activator-like 1A, putative, expressed
				LOC_Os08g06620	DNA polymerase delta subunit 4 family, putative, expressed
				LOC_Os08g06630	RNA polymerase sigma factor, putative, expressed
				LOC_Os08g06640	stress-induced protein, putative, expressed
				LOC_Os08g06659	expressed protein
				LOC_Os08g06680	hypothetical protein
qAKT8.27	8	27687657	28135748	LOC_Os08g43960	carrier, putative, expressed
				LOC_Os08g43970	carrier, putative, expressed
				LOC_Os08g43980	carrier, putative, expressed
				LOC_Os08g44000	uncharacterized protein ycf39, putative, expressed
				LOC_Os08g44010	WD domain, G-beta repeat domain containing protein, expressed
				LOC_Os08g44015	growth regulator related protein, putative, expressed
				LOC_Os08g44020	rhamnogalacturonate lyase, putative, expressed
				LOC_Os08g44030	hypothetical protein
				LOC_Os08g44040	rhamnogalacturonate lyase, putative, expressed
				LOC_Os08g44050	ZOS8-12 - C2H2 zinc finger protein, expressed
				LOC_Os08g44060	hypothetical protein
				LOC_Os08g44070	expressed protein
				LOC_Os08g44080	expressed protein
				LOC_Os08g44150	transmembrane 9 superfamily member, putative, expressed
				LOC_Os08g44160	expressed protein
				LOC_Os08g44180	expressed protein
				LOC_Os08g44190	ZOS8-13 - C2H2 zinc finger protein, expressed
				LOC_Os08g44200	ECT5, putative, expressed
				LOC_Os08g44210	dihydroneopterin aldolase, putative, expressed
				LOC_Os08g44220	GLTP domain containing protein, putative, expressed
				LOC_Os08g44230	zinc finger family protein, putative, expressed
				LOC_Os08g44240	AAA-type ATPase family protein, putative, expressed
				LOC_Os08g44250	fiber protein Fb14, putative, expressed
				LOC_Os08g44260	inositol or phosphatidylinositol phosphatase/ phosphoric monoester hydrolase, putative, expressed
				LOC_Os08g44270	vignain precursor, putative, expressed
				LOC_Os08g44280	protein-L-isoaspartate O-methyltransferase, putative, expressed
				LOC_Os08g44290	RNA recognition motif containing protein, putative, expressed
				LOC_Os08g44310	expressed protein
				LOC_Os08g44320	low molecular weight protein-tyrosine-phosphatase slr0328, putative, expressed
				LOC_Os08g44330	peptidylprolyl isomerase domain and WD repeat-containing protein 1, putative, expressed
				LOC_Os08g44340	monodehydroascorbate reductase, putative, expressed
				LOC_Os08g44350	histidine-containing phosphotransfer protein, putative, expressed
				LOC_Os08g44360	male sterility protein 2, putative, expressed
				LOC_Os08g44370	inosine-uridine preferring nucleoside hydrolase family protein, putative, expressed
				LOC_Os08g44380	L1P family of ribosomal proteins domain containing protein, expressed
				LOC_Os08g44390	EF hand family protein, putative, expressed
				LOC_Os08g44400	glutathione S-transferase, N-terminal domain containing protein, expressed
				LOC_Os08g44410	harpin-induced protein 1 domain containing protein, expressed
				LOC_Os08g44420	kinesin-related protein, putative, expressed
				LOC_Os08g44430	vesicle-associated membrane protein 727, putative, expressed
				LOC_Os08g44440	multiple myeloma tumor-associated protein 2, putative, expressed
				LOC_Os08g44450	L1P family of ribosomal proteins domain containing protein, expressed
				LOC_Os08g44460	expressed protein
				LOC_Os08g44470	expressed protein
				LOC_Os08g44480	40S ribosomal protein S25, putative, expressed
				LOC_Os08g44510	UDP-N-acetylglucosamine--peptide N-acetylglucosaminyltransferase SPINDLY, putative, expressed
				LOC_Os08g44520	peptidyl-prolyl cis-trans isomerase, putative, expressed
				LOC_Os08g44530	dihydroxy-acid dehydratase, putative, expressed
				LOC_Os08g44540	expressed protein
				LOC_Os08g44550	expressed protein
				LOC_Os08g44560	expressed protein
				LOC_Os08g44590	gibberellin 20 oxidase 2, putative, expressed
				LOC_Os08g44610	expressed protein
				LOC_Os08g44620	zinc-binding protein, putative, expressed
				LOC_Os08g44640	OsSCP41 - Putative Serine Carboxypeptidase homologue, expressed
				LOC_Os08g44650	expressed protein
				LOC_Os08g44660	EF hand family protein, putative, expressed
				LOC_Os08g44670	calreticulin precursor, putative, expressed
				LOC_Os08g44680	photosystem I reaction center subunit II, chloroplast precursor, putative, expressed
				LOC_Os08g44690	transposon protein, putative, Pong sub-class, expressed
				LOC_Os08g44730	hypothetical protein
				LOC_Os08g44740	expressed protein
				LOC_Os08g44750	auxin-induced protein 5NG4, putative, expressed
				LOC_Os08g44760	domain of unknown function DUF966 domain containing protein, expressed
				LOC_Os08g44770	copper/zinc superoxide dismutase, putative, expressed
qAKT12.27	12	27205921	27488377	LOC_Os12g43820	GCRP5 - Glycine and cysteine rich family protein precursor, expressed
				LOC_Os12g43830	NUC189 domain containing protein, expressed
				LOC_Os12g43840	ankyrin repeat domain-containing protein, putative, expressed
				LOC_Os12g43870	expressed protein
				LOC_Os12g43880	DNA binding protein, putative, expressed
				LOC_Os12g43890	GNS1/SUR4 membrane family protein, putative, expressed
				LOC_Os12g43900	retrotransposon protein, putative, LINE subclass, expressed
				LOC_Os12g43930	zinc finger, C3HC4 type domain containing protein, expressed
				LOC_Os12g43940	ankyrin repeat domain-containing protein, putative, expressed
				LOC_Os12g43950	homeobox domain containing protein, expressed
				LOC_Os12g43960	hypothetical protein
				LOC_Os12g43970	hydrolase, alpha/beta fold family domain containing protein, expressed
				LOC_Os12g43990	expressed protein
				LOC_Os12g44000	ubiquitin-conjugating enzyme E2 W, putative, expressed
				LOC_Os12g44010	purple acid phosphatase precursor, putative, expressed
				LOC_Os12g44020	Ser/Thr protein phosphatase family protein, putative, expressed
				LOC_Os12g44030	purple acid phosphatase precursor, putative, expressed
				LOC_Os12g44050	purple acid phosphatase precursor, putative, expressed
				LOC_Os12g44060	nodulin, putative, expressed
				LOC_Os12g44070	nodulin, putative, expressed
				LOC_Os12g44080	CHCH domain containing protein, expressed
				LOC_Os12g44090	leucine-rich repeat family protein, putative, expressed
				LOC_Os12g44100	peptide transporter PTR2, putative, expressed
				LOC_Os12g44110	ligA, putative, expressed
				LOC_Os12g44130	expressed protein
				LOC_Os12g44140	expressed protein
				LOC_Os12g44150	plasma membrane ATPase, putative, expressed
				LOC_Os12g44160	oxidoreductase, putative, expressed
				LOC_Os12g44170	pentatricopeptide, putative, expressed
				LOC_Os12g44180	nodulin, putative, expressed
				LOC_Os12g44190	ATPase 3, putative, expressed
				LOC_Os12g44210	ATPase, AAA family domain containing protein, expressed
				LOC_Os12g44220	ATPase 2, putative, expressed
				LOC_Os12g44230	expressed protein
				LOC_Os12g44240	N-acetylglucosaminyltransferase, putative, expressed
				LOC_Os12g44250	vesicle-associated membrane protein, putative, expressed
				LOC_Os12g44260	heat shock protein DnaJ, putative, expressed
				LOC_Os12g44270	glycine-rich protein, putative, expressed
				LOC_Os12g44280	subtilase, putative, expressed
				LOC_Os12g44290	cytochrome P450, putative, expressed
				LOC_Os12g44300	CHX28, putative, expressed
				LOC_Os12g44310	carotenoid cleavage dioxygenase, putative, expressed
				LOC_Os12g44320	carbohydrate binding protein, putative, expressed
				LOC_Os12g44330	serine/threonine-protein kinase PRP4, putative, expressed
qlogCHL8.17	8	1707207	1929247	LOC_Os08g03620	tetratricopeptide repeat domain containing protein, expressed
				LOC_Os08g03630	acyl-activating enzyme 14, putative, expressed
				LOC_Os08g03640	60S acidic ribosomal protein P0, putative, expressed
				LOC_Os08g03650	BTBN17 - Bric-a-Brac, Tramtrack, Broad Complex BTB domain with non-phototropic hypocotyl 3 NPH3 and coiled-coil domains, expressed
				LOC_Os08g03670	galactosyltransferase family protein, putative, expressed
				LOC_Os08g03676	pentatricopeptide, putative, expressed
				LOC_Os08g03682	cytochrome P450, putative, expressed
				LOC_Os08g03690	LTPL24 - Protease inhibitor/seed storage/LTP family protein precursor, expressed
				LOC_Os08g03700	glycerol-3-phosphate acyltransferase, putative, expressed
				LOC_Os08g03710	expressed protein
				LOC_Os08g03730	transposon protein, putative, CACTA, En/Spm sub-class, expressed
				LOC_Os08g03740	transposon protein, putative, CACTA, En/Spm sub-class
				LOC_Os08g03750	expressed protein
				LOC_Os08g03760	hypothetical protein
				LOC_Os08g03770	expressed protein
				LOC_Os08g03790	expressed protein
				LOC_Os08g03820	expressed protein
				LOC_Os08g03825	expressed protein
				LOC_Os08g03830	expressed protein
				LOC_Os08g03840	expressed protein
				LOC_Os08g03850	expressed protein
				LOC_Os08g03860	expressed protein
				LOC_Os08g03870	2-aminoethanethiol dioxygenase, putative, expressed
				LOC_Os08g03890	hypothetical protein
				LOC_Os08g03900	expressed protein
				LOC_Os08g03940	retrotransposon protein, putative, unclassified, expressed
				LOC_Os08g03990	expressed protein
				LOC_Os08g04000	expressed protein
				LOC_Os08g04010	2-aminoethanethiol dioxygenase, putative, expressed
qlogCHL1.38	1	38286772	39460409	LOC_Os01g65950	thioesterase family protein, putative, expressed
				LOC_Os01g65970	transcription factor HBP-1b, putative, expressed
				LOC_Os01g65986	DUF803 domain containing, putative, expressed
				LOC_Os01g65992	expressed protein
				LOC_Os01g66000	NADH dehydrogenase I subunit N, putative, expressed
				LOC_Os01g66010	amino acid transporter, putative, expressed
				LOC_Os01g66020	protein kinase family protein, putative, expressed
				LOC_Os01g66030	OsMADS2 - MADS-box family gene with MIKCc type-box, expressed
				LOC_Os01g66040	receptor kinase, putative, expressed
				LOC_Os01g66050	wound-responsive family protein, putative, expressed
				LOC_Os01g66060	expressed protein
				LOC_Os01g66070	PHD-finger domain containing protein, putative
				LOC_Os01g66100	gibberellin 20 oxidase 2, putative, expressed
				LOC_Os01g66110	methyltransferase, putative, expressed
				LOC_Os01g66120	No apical meristem protein, putative, expressed
				LOC_Os01g66130	armadillo/beta-catenin repeat family protein, putative, expressed
				LOC_Os01g66140	plus-3 domain containing protein, putative, expressed
				LOC_Os01g66150	expressed protein
				LOC_Os01g66160	pentatricopeptide, putative, expressed
				LOC_Os01g66170	SNARE associated Golgi protein, putative, expressed
				LOC_Os01g66180	cytochrome c, putative, expressed
				LOC_Os01g66190	expressed protein
				LOC_Os01g66200	expressed protein
				LOC_Os01g66230	csAtPR5, putative, expressed
				LOC_Os01g66240	mitochondrion protein, putative, expressed
				LOC_Os01g66250	S-locus-like receptor protein kinase, putative, expressed
				LOC_Os01g66260	expressed protein
				LOC_Os01g66270	AP2 domain containing protein, expressed
				LOC_Os01g66280	transcriptional regulator, putative, expressed
				LOC_Os01g66290	OsMADS21 - MADS-box family gene with MIKCc type-box, expressed
				LOC_Os01g66300	KH domain containing protein, putative, expressed
				LOC_Os01g66310	expressed protein
				LOC_Os01g66320	expressed protein
				LOC_Os01g66330	ATP-dependent Clp protease ATP-binding subunit clpX, putative, expressed
				LOC_Os01g66340	expressed protein
				LOC_Os01g66350	DUF647 domain containing protein, putative, expressed
				LOC_Os01g66360	2-C-methyl-D-erythritol 4-phosphate cytidylyltransferase, putative, expressed
				LOC_Os01g66379	expressed protein
				LOC_Os01g66400	expressed protein
				LOC_Os01g66410	expressed protein
				LOC_Os01g66420	PHD finger protein, putative, expressed
				LOC_Os01g66440	expressed protein
				LOC_Os01g66450	retrotransposon protein, putative, unclassified, expressed
				LOC_Os01g66480	expressed protein
				LOC_Os01g66490	no apical meristem protein, putative, expressed
				LOC_Os01g66500	phosphoribosylformylglycinamidine synthase, putative, expressed
				LOC_Os01g66510	MLO domain containing protein, putative, expressed
				LOC_Os01g66520	serine/threonine-protein kinase RIO-like, putative, expressed
				LOC_Os01g66530	ARGOS, putative, expressed
				LOC_Os01g66544	expressed protein
				LOC_Os01g66560	signal recognition particle 72 kDa protein, putative, expressed
				LOC_Os01g66570	ZOS1-19 - C2H2 zinc finger protein, expressed
				LOC_Os01g66580	RNA polymerase III RPC4 domain containing protein, expressed
				LOC_Os01g66590	DUF260 domain containing protein, putative, expressed
				LOC_Os01g66600	rhodanese-like, putative, expressed
				LOC_Os01g66610	serine/threonine-protein kinase receptor precursor, putative, expressed
				LOC_Os01g66620	glucosyltransferase, putative, expressed
				LOC_Os01g66630	S-domain receptor-like protein kinase, putative, expressed
				LOC_Os01g66640	S-domain receptor-like protein kinase, putative, expressed
				LOC_Os01g66650	expressed protein
				LOC_Os01g66660	expressed protein
				LOC_Os01g66670	expressed protein
				LOC_Os01g66680	S-domain receptor-like protein kinase, putative, expressed
				LOC_Os01g66690	ZIP4/SPO22, putative, expressed
				LOC_Os01g66700	beta-hexosaminidase precursor, putative, expressed
				LOC_Os01g66710	polygalacturonase, putative, expressed
				LOC_Os01g66720	NADP-dependent oxidoreductase, putative, expressed
				LOC_Os01g66730	exosome complex exonuclease RRP40, putative, expressed
				LOC_Os01g66740	inactive receptor kinase At1g27190 precursor, putative, expressed
				LOC_Os01g66760	inactive receptor kinase At2g26730 precursor, putative, expressed
				LOC_Os01g66800	expressed protein
				LOC_Os01g66810	expressed protein
				LOC_Os01g66820	inactive receptor kinase At1g27190 precursor, putative, expressed
				LOC_Os01g66830	pectinacetylesterase domain containing protein, expressed
				LOC_Os01g66840	pectinacetylesterase domain containing protein, expressed
				LOC_Os01g66850	pectinacetylesterase domain containing protein, expressed
				LOC_Os01g66860	serine/threonine protein kinase, putative, expressed
				LOC_Os01g66890	BTBZ1 - Bric-a-Brac, Tramtrack, and Broad Complex BTB domain with TAZ zinc finger and Calmodulin-binding domains, expressed
				LOC_Os01g66900	expressed protein
				LOC_Os01g66910	expressed protein
				LOC_Os01g66920	Ser/Thr protein phosphatase family protein, putative, expressed
				LOC_Os01g66940	kinase, pfkB family, putative, expressed
				LOC_Os01g66950	expressed protein
				LOC_Os01g66960	selenoprotein precursor, putative, expressed
				LOC_Os01g66970	zinc finger, C3HC4 type domain containing protein, expressed
				LOC_Os01g66980	expressed protein
				LOC_Os01g66990	expressed protein
				LOC_Os01g67000	membrane-associated 30 kDa protein, chloroplast precursor, putative, expressed
				LOC_Os01g67010	expressed protein
				LOC_Os01g67030	auxin-responsive protein, putative, expressed
				LOC_Os01g67040	OsRhmbd5 - Putative Rhomboid homologue, expressed
				LOC_Os01g67054	calreticulin precursor protein, putative, expressed
				LOC_Os01g67070	expressed protein
				LOC_Os01g67080	expressed protein
				LOC_Os01g67090	IQ calmodulin-binding motif domain containing protein, expressed
				LOC_Os01g67100	expressed protein
				LOC_Os01g67110	expressed protein
				LOC_Os01g67120	rhodanese-like domain containing protein, putative, expressed
				LOC_Os01g67134	ribosomal L18p/L5e family protein, putative, expressed
				LOC_Os01g67150	expressed protein
				LOC_Os01g67160	cyclin-dependent kinase B1-1, putative, expressed
				LOC_Os01g67170	expressed protein
				LOC_Os01g67180	ribonuclease T2 family domain containing protein, expressed
				LOC_Os01g67190	ribonuclease T2 family domain containing protein, expressed
				LOC_Os01g67200	ribosomal protein L13 family protein, putative, expressed
				LOC_Os01g67210	PPR repeat domain containing protein, putative, expressed
				LOC_Os01g67220	Os1bglu4 - beta-glucosidase-like protein without signal sequence, expressed
				LOC_Os01g67240	formin-like protein 1 precursor, putative, expressed
				LOC_Os01g67250	Rad21 / Rec8 like protein, putative, expressed
				LOC_Os01g67260	expressed protein
				LOC_Os01g67270	expressed protein
				LOC_Os01g67280	expressed protein
				LOC_Os01g67290	cyclin-related protein, putative, expressed
				LOC_Os01g67300	expressed protein
				LOC_Os01g67310	patatin, putative, expressed
				LOC_Os01g67314	expressed protein
				LOC_Os01g67320	expressed protein
				LOC_Os01g67330	nucleotide-sugar transporter family protein, putative, expressed
				LOC_Os01g67340	STRUBBELIG-RECEPTOR FAMILY 8 precursor, putative, expressed
				LOC_Os01g67350	cysteine protease, putative, expressed
				LOC_Os01g67360	methyltransferase, putative, expressed
				LOC_Os01g67370	expressed protein
				LOC_Os01g67380	expressed protein
				LOC_Os01g67390	POEI32 - Pollen Ole e I allergen and extensin family protein precursor, expressed
				LOC_Os01g67400	hypothetical protein
				LOC_Os01g67410	AP2/EREBP transcription factor BABY BOOM, putative, expressed
				LOC_Os01g67420	lipase, putative, expressed
				LOC_Os01g67430	lipase, putative, expressed
				LOC_Os01g67450	lipase, putative, expressed
				LOC_Os01g67480	helix-loop-helix DNA-binding domain containing protein, expressed
				LOC_Os01g67490	OTU-like cysteine protease family protein, putative, expressed
				LOC_Os01g67500	armadillo/beta-catenin repeat family protein, putative, expressed
				LOC_Os01g67510	recA protein, putative, expressed
				LOC_Os01g67520	VTC2, putative, expressed
				LOC_Os01g67530	AMP-binding enzyme, putative, expressed
				LOC_Os01g67540	AMP-binding domain containing protein, expressed
				LOC_Os01g67550	FAD binding domain containing protein, expressed
				LOC_Os01g67560	Divergent PAP2 family domain containing protein, expressed
				LOC_Os01g67570	PDE312/PTAC10, putative, expressed
				LOC_Os01g67580	multidrug resistance-associated protein, putative, expressed
				LOC_Os01g67590	oligopeptidase, putative, expressed
				LOC_Os01g67600	CXE carboxylesterase, putative, expressed
				LOC_Os01g67610	hypothetical protein
				LOC_Os01g67620	expressed protein
				LOC_Os01g67630	peptide transporter PTR2, putative, expressed
				LOC_Os01g67640	PTR-like peptide transporter, putatuve, expressed
				LOC_Os01g67650	gibberellin response modulator protein, putative, expressed
				LOC_Os01g67660	expressed protein
				LOC_Os01g67670	gibberellin response modulator protein, putative, expressed
				LOC_Os01g67680	expressed protein
				LOC_Os01g67700	expressed protein
				LOC_Os01g67710	hypothetical protein
				LOC_Os01g67720	ABC1 family domain containing protein, putative, expressed
				LOC_Os01g67730	1-5-phosphoribosyl-5-5-phosphoribosylaminomethylideneaminoimidazole-4-carboxamide isomerase, chloroplast precursor, putative, expressed
				LOC_Os01g67740	chromosome segregation protein, putative, expressed
				LOC_Os01g67750	expressed protein
				LOC_Os01g67760	expressed protein
				LOC_Os01g67770	two-component response regulator, putative, expressed
				LOC_Os01g67790	F-box protein interaction domain containing protein, expressed
				LOC_Os01g67810	transposon protein, putative, unclassified, expressed
				LOC_Os01g67820	exo70 exocyst complex subunit domain containing protein, expressed
				LOC_Os01g67830	B3 DNA binding domain containing protein, expressed
				LOC_Os01g67835	ompA/MotB, putative, expressed
				LOC_Os01g67850	zinc finger, RING-type, putative, expressed
				LOC_Os01g67860	fructose-bisphospate aldolase isozyme, putative, expressed
				LOC_Os01g67870	expressed protein
				LOC_Os01g67880	vacuolar protein sorting-associated protein 53, putative, expressed
qlogSHL2.31	2	31461037	31512244	LOC_Os02g51370	glutaredoxin, putative, expressed
				LOC_Os02g51380	expressed protein
				LOC_Os02g51390	expressed protein
				LOC_Os02g51400	AAA family ATPase, putative, expressed
				LOC_Os02g51404	expressed protein
				LOC_Os02g51410	shikimate kinase, putative, expressed
				LOC_Os02g51414	expressed protein
				LOC_Os02g51420	expressed protein
qlogSHL6.006	6	690909	1909168	LOC_Os06g02220	MTA/SAH nucleosidase, putative, expressed
				LOC_Os06g02230	B3 DNA binding domain containing protein, expressed
				LOC_Os06g02240	RNA recognition motif containing protein, putative, expressed
				LOC_Os06g02250	MYB family transcription factor, putative, expressed
				LOC_Os06g02260	callose synthase, putative, expressed
				LOC_Os06g02270	expressed protein
				LOC_Os06g02280	expressed protein
				LOC_Os06g02320	expressed protein
				LOC_Os06g02330	expressed protein
				LOC_Os06g02340	OsFBX183 - F-box domain containing protein, expressed
				LOC_Os06g02350	S-phase kinase-associated protein 1A, putative, expressed
				LOC_Os06g02360	Skp1 family, dimerisation domain containing protein, expressed
				LOC_Os06g02370	expressed protein
				LOC_Os06g02380	T-complex protein, putative, expressed
				LOC_Os06g02390	ADP-ribosylation factor 1, putative, expressed
				LOC_Os06g02400	OsFBO18 - F-box and other domain containing protein, expressed
				LOC_Os06g02410	expressed protein
				LOC_Os06g02420	ATOZI1, putative, expressed
				LOC_Os06g02430	expressed protein
				LOC_Os06g02440	expressed protein
				LOC_Os06g02450	expressed protein
				LOC_Os06g02460	expressed protein
				LOC_Os06g02470	ATOZI1, putative, expressed
				LOC_Os06g02480	expressed protein
				LOC_Os06g02490	acyl CoA binding protein, putative, expressed
				LOC_Os06g02500	superoxide dismutase, chloroplast, putative, expressed
				LOC_Os06g02510	ribosomal protein L13, putative, expressed
				LOC_Os06g02520	interacting protein of DMI3, putative, expressed
				LOC_Os06g02530	expressed protein
				LOC_Os06g02540	expressed protein
				LOC_Os06g02550	CPuORF21 - conserved peptide uORF-containing transcript, expressed
				LOC_Os06g02555	expressed protein
				LOC_Os06g02560	growth-regulating factor, putative, expressed
				LOC_Os06g02570	syntaxin, putative, expressed
				LOC_Os06g02580	high-affinity nickel-transport family protein, putative, expressed
				LOC_Os06g02590	DUF1336 domain containing protein, expressed
				LOC_Os06g02600	DAG protein, chloroplast precursor, putative, expressed
				LOC_Os06g02610	folic acid binding protein, putative, expressed
				LOC_Os06g02620	chaperone protein dnaJ, putative, expressed
				LOC_Os06g02640	ripening-related protein precursor, putative, expressed
				LOC_Os06g02650	retrotransposon protein, putative, unclassified, expressed
				LOC_Os06g02660	hypothetical protein
				LOC_Os06g02670	expressed protein
				LOC_Os06g02680	expressed protein
				LOC_Os06g02690	expressed protein
				LOC_Os06g02710	expressed protein
				LOC_Os06g02730	aspartic proteinase nepenthesin-2 precursor, putative, expressed
				LOC_Os06g02760	expressed protein
				LOC_Os06g02770	expressed protein
				LOC_Os06g02780	aspartic protease, putative, expressed
				LOC_Os06g02800	expressed protein
				LOC_Os06g02810	expressed protein
				LOC_Os06g02830	expressed protein
				LOC_Os06g02840	expressed protein
				LOC_Os06g02850	expressed protein
				LOC_Os06g02860	expressed protein
				LOC_Os06g02870	expressed protein
				LOC_Os06g02900	aspartic proteinase nepenthesin-2 precursor, putative, expressed
				LOC_Os06g02930	expressed protein
				LOC_Os06g02940	expressed protein
				LOC_Os06g02960	expressed protein
				LOC_Os06g02980	ATP synthase F1, epsilon subunit family protein, expressed
				LOC_Os06g03020	expressed protein
				LOC_Os06g03030	expressed protein
				LOC_Os06g03040	expressed protein
				LOC_Os06g03050	expressed protein
				LOC_Os06g03059	expressed protein
				LOC_Os06g03070	expressed protein
				LOC_Os06g03080	aspartic protease, putative, expressed
				LOC_Os06g03090	expressed protein
				LOC_Os06g03099	expressed protein
				LOC_Os06g03110	expressed protein
				LOC_Os06g03120	aspartic proteinase nepenthesin-2 precursor, putative, expressed
				LOC_Os06g03150	expressed protein
				LOC_Os06g03160	expressed protein
				LOC_Os06g03165	expressed protein
				LOC_Os06g03180	expressed protein
				LOC_Os06g03200	expressed protein
				LOC_Os06g03210	expressed protein
				LOC_Os06g03220	expressed protein
				LOC_Os06g03230	hypothetical protein
				LOC_Os06g03240	expressed protein
				LOC_Os06g03260	retrotransposon protein, putative, unclassified, expressed
				LOC_Os06g03290	conserved hypothetical protein
				LOC_Os06g03330	hypothetical protein
				LOC_Os06g03380	expressed protein
				LOC_Os06g03390	expressed protein
				LOC_Os06g03486	expressed protein
				LOC_Os06g03500	NBS-LRR disease resistance protein, putative, expressed
				LOC_Os06g03514	expressed protein
				LOC_Os06g03520	DUF581 domain containing protein, expressed
				LOC_Os06g03530	pentatricopeptide, putative, expressed
				LOC_Os06g03540	oligopeptide transporter, putative, expressed
				LOC_Os06g03550	hypothetical protein
				LOC_Os06g03560	oligopeptide transporter, putative, expressed
				LOC_Os06g03570	pentatricopeptide, putative, expressed
				LOC_Os06g03580	zinc RING finger protein, putative, expressed
				LOC_Os06g03600	transcriptional corepressor SEUSS, putative, expressed
				LOC_Os06g03610	TKL_IRAK_CrRLK1L-1.13 - The CrRLK1L-1 subfamily has homology to the CrRLK1L homolog, expressed
				LOC_Os06g03620	expressed protein
				LOC_Os06g03630	expressed protein
				LOC_Os06g03640	BAG domain containing protein, expressed
				LOC_Os06g03650	expressed protein
				LOC_Os06g03660	peroxisomal biogenesis factor 11, putative, expressed
				LOC_Os06g03670	dehydration-responsive element-binding protein, putative, expressed
				LOC_Os06g03676	CAMK_CAMK_like.6 - CAMK includes calcium/calmodulin depedent protein kinases, expressed
				LOC_Os06g03682	calcium-dependent protein kinase isoform AK1, putative, expressed
				LOC_Os06g03690	RNA recognition motif containing protein, putative, expressed
				LOC_Os06g03700	oligopeptide transporter, putative, expressed
				LOC_Os06g03710	DELLA protein SLR1, putative, expressed
				LOC_Os06g03720	ribonucleoside-diphosphate reductase small chain, putative, expressed
				LOC_Os06g03740	folic acid binding protein, putative, expressed
				LOC_Os06g03750	dehydration response related protein, putative, expressed
				LOC_Os06g03760	LMBR1 integral membrane protein, putative, expressed
				LOC_Os06g03770	ABC transporter, ATP-binding protein, putative, expressed
				LOC_Os06g03780	NUC153 domain containing protein, expressed
				LOC_Os06g03790	39S ribosomal protein L47, mitochondrial precursor, putative, expressed
				LOC_Os06g03800	pollen ankyrin, putative, expressed
				LOC_Os06g03810	expressed protein
				LOC_Os06g03820	expressed protein
				LOC_Os06g03830	retinol dehydrogenase, putative, expressed
				LOC_Os06g03840	H-BTB4 - Bric-a-Brac, Tramtrack, Broad Complex BTB domain with H family conserved sequence, expressed
				LOC_Os06g03850	impaired sucrose induction 1, putative, expressed
				LOC_Os06g03860	uncharacterized membrane protein, putative, expressed
				LOC_Os06g03880	expressed protein
				LOC_Os06g03890	alpha-L-fucosidase 3 precursor, putative, expressed
				LOC_Os06g03900	esterase precursor, putative, expressed
				LOC_Os06g03910	hydrolase, NUDIX family, domain containing protein, expressed
				LOC_Os06g03920	expressed protein
				LOC_Os06g03930	cytochrome P450 86A1, putative, expressed
				LOC_Os06g03940	spastin, putative, expressed
				LOC_Os06g03960	expressed protein
				LOC_Os06g03970	receptor-like protein kinase 5 precursor, putative, expressed
				LOC_Os06g03980	expressed protein
				LOC_Os06g03990	aminotransferase, classes I and II, domain containing protein, expressed
				LOC_Os06g04000	peptidyl-prolyl cis-trans isomerase, putative, expressed
				LOC_Os06g04010	GAGA-binding protein, putative, expressed
				LOC_Os06g04020	histone H1, putative, expressed
				LOC_Os06g04030	histone H3, putative, expressed
				LOC_Os06g04040	WD domain, G-beta repeat domain containing protein, expressed
				LOC_Os06g04060	expressed protein
				LOC_Os06g04070	pyridoxal-dependent decarboxylase protein, putative, expressed
				LOC_Os06g04080	glycosyl hydrolases family 17, putative, expressed
				LOC_Os06g04090	no apical meristem protein, putative, expressed
				LOC_Os06g04100	conserved hypothetical protein
				LOC_Os06g04120	hypothetical protein
				LOC_Os06g04130	lung seven transmembrane domain containing protein, putative, expressed
				LOC_Os06g04140	expressed protein
				LOC_Os06g04150	magnesium-protoporphyrin O-methyltransferase, putative, expressed
				LOC_Os06g04169	hydrolase, alpha/beta fold family domain containing protein, expressed
				LOC_Os06g04190	rad1, putative, expressed
				LOC_Os06g04195	expressed protein
				LOC_Os06g04200	starch synthase, putative, expressed
				LOC_Os06g04210	expressed protein
				LOC_Os06g04220	expressed protein
				LOC_Os06g04230	expressed protein
				LOC_Os06g04240	expressed protein
				LOC_Os06g04250	phosphate-induced protein 1 conserved region domain containing protein, expressed
				LOC_Os06g04270	transketolase, chloroplast precursor, putative, expressed
				LOC_Os06g04280	3-phosphoshikimate 1-carboxyvinyltransferase, chloroplast precursor, putative, expressed
				LOC_Os06g04290	S10/S20 domain containing ribosomal protein, putative, expressed
				LOC_Os06g04300	tRNA 2-phosphotransferase 1, putative, expressed
				LOC_Os06g04310	expressed protein
				LOC_Os06g04330	expressed protein
				LOC_Os06g04340	expressed protein
				LOC_Os06g04350	expressed protein
				LOC_Os06g04360	expressed protein
				LOC_Os06g04370	expressed protein
				LOC_Os06g04380	aminomethyltransferase, putative, expressed
				LOC_Os06g04390	expressed protein
				LOC_Os06g04399	hypersensitive-induced reaction protein 4, putative, expressed
				LOC_Os06g04410	expressed protein
				LOC_Os06g04420	lipoxygenase 4, putative
				LOC_Os06g04430	expressed protein
				LOC_Os06g04440	expressed protein
				LOC_Os06g04450	Sec1 family transport protein, putative, expressed
qlogSHL7.19	7	19188413	19412780	LOC_Os07g32290	expressed protein
				LOC_Os07g32340	retrotransposon protein, putative, unclassified, expressed
				LOC_Os07g32350	WD domain, G-beta repeat domain containing protein, expressed
				LOC_Os07g32360	expressed protein
				LOC_Os07g32380	protein phosphatase 2C, putative, expressed
				LOC_Os07g32390	targeting protein-related, putative, expressed
				LOC_Os07g32400	STE_PAK_Ste20_MST_like.1 - STE kinases include homologs to sterile 7, sterile 11 and sterile 20 from yeast, expressed
				LOC_Os07g32406	expressed protein
				LOC_Os07g32420	bromodomain domain containing protein, expressed
				LOC_Os07g32430	pre-mRNA-splicing factor ATP-dependent RNA helicase PRP16, putative, expressed
				LOC_Os07g32440	expressed protein
				LOC_Os07g32450	protein kinase PKN/PRK1, effector, putative, expressed
				LOC_Os07g32460	src homology-3 domain protein 3, putative, expressed
				LOC_Os07g32470	expressed protein
				LOC_Os07g32480	mitotic checkpoint serine/threonine-protein kinase BUB1, putative, expressed
				LOC_Os07g32510	dof zinc finger domain containing protein, putative, expressed
				LOC_Os07g32520	expressed protein
				LOC_Os07g32530	potassium transporter, putative, expressed
				LOC_Os07g32540	hypothetical protein
				LOC_Os07g32550	dimethyladenosine transferase, putative, expressed
				LOC_Os07g32560	ATP-dependent protease, putative, expressed
qlogSHL9.17	9	17841553	18034390	LOC_Os09g29390	plastocyanin-like domain containing protein, putative, expressed
				LOC_Os09g29404	glycogen operon protein glgX, putative, expressed
				LOC_Os09g29420	queuine tRNA-ribosyltransferase, putative, expressed
				LOC_Os09g29430	citrate transporter, putative, expressed
				LOC_Os09g29440	expressed protein
				LOC_Os09g29460	homeobox associated leucine zipper, putative, expressed
				LOC_Os09g29470	AGAP005770-PA, putative, expressed
				LOC_Os09g29480	2-aminoethanethiol dioxygenase, putative, expressed
				LOC_Os09g29490	peroxidase precursor, putative, expressed
				LOC_Os09g29510	OsWAK80 - OsWAK receptor-like protein kinase, expressed
				LOC_Os09g29520	OsWAK81 - OsWAK receptor-like cytoplasmic kinase OsWAK-RLCK, expressed
				LOC_Os09g29530	expressed protein
				LOC_Os09g29540	OsWAK82 - OsWAK receptor-like cytoplasmic kinase OsWAK-RLCK, expressed
				LOC_Os09g29550	dof zinc finger protein 2, putative
				LOC_Os09g29560	OsWAK83 - OsWAK pseudogene, expressed
				LOC_Os09g29570	expressed protein
				LOC_Os09g29584	OsWAK84 - OsWAK receptor-like protein OsWAK-RLP, expressed
				LOC_Os09g29600	OsWAK85 - OsWAK receptor-like cytoplasmic kinase OsWAK-RLCK, expressed
				LOC_Os09g29610	hypothetical protein
				LOC_Os09g29620	expressed protein
				LOC_Os09g29630	NOL1/NOP2/sun family protein, putative, expressed
				LOC_Os09g29640	hypothetical protein
				LOC_Os09g29650	expressed protein
qlogSHL9.20	9	20574991	20776623	LOC_Os09g35780	BAP2, putative, expressed
				LOC_Os09g35790	HSF-type DNA-binding domain containing protein, expressed
				LOC_Os09g35800	UDP-glucose 4-epimerase, putative, expressed
				LOC_Os09g35810	NC domain-containing protein, putative, expressed
				LOC_Os09g35830	RNA recognition motif containing protein, putative, expressed
				LOC_Os09g35850	RNA recognition motif containing protein, putative, expressed
				LOC_Os09g35860	ras-related protein, putative, expressed
				LOC_Os09g35870	OsIAA26 - Auxin-responsive Aux/IAA gene family member, expressed
				LOC_Os09g35880	B-box zinc finger family protein, putative, expressed
				LOC_Os09g35890	kinesin motor domain containing protein, expressed
				LOC_Os09g35900	expressed protein
				LOC_Os09g35910	homeobox associated leucine zipper, putative, expressed
				LOC_Os09g35920	mediator of RNA polymerase II transcription subunit 10, putative, expressed
				LOC_Os09g35940	cytochrome P450, putative, expressed
				LOC_Os09g35960	TBC domain containing protein, expressed
				LOC_Os09g35970	6-phosphogluconolactonase, putative, expressed
				LOC_Os09g35980	expressed protein
				LOC_Os09g35990	expressed protein
				LOC_Os09g36000	expressed protein
				LOC_Os09g36010	expressed protein
				LOC_Os09g36020	EAP30/Vps36 family domain containing protein, expressed
				LOC_Os09g36030	4-hydroxy-2-oxovalerate aldolase, putative, expressed
				LOC_Os09g36040	rhodanese-like domain containing protein, putative, expressed
				LOC_Os09g36050	expressed protein
				LOC_Os09g36060	endoglucanase, putative, expressed
				LOC_Os09g36070	cytochrome P450, putative, expressed
				LOC_Os09g36080	cytochrome P450, putative, expressed
qRTL2.08	2	8268535	8898321	LOC_Os02g14874	expressed protein
				LOC_Os02g14880	hypothetical protein
				LOC_Os02g14890	expressed protein
				LOC_Os02g14900	1,3-beta-glucan synthase component domain containing protein, expressed
				LOC_Os02g14910	bZIP transcription factor family protein, putative, expressed
				LOC_Os02g14929	T-complex protein, putative, expressed
				LOC_Os02g14970	expressed protein
				LOC_Os02g14980	calcium-binding EF hand family protein, putative, expressed
				LOC_Os02g14990	zinc finger, C3HC4 type domain containing protein, expressed
				LOC_Os02g15000	zinc finger, C3HC4 type domain containing protein, expressed
				LOC_Os02g15010	zinc finger, C3HC4 type domain containing protein, expressed
				LOC_Os02g15020	zinc finger, C3HC4 type domain containing protein, expressed
				LOC_Os02g15030	expressed protein
				LOC_Os02g15040	hypothetical protein
				LOC_Os02g15050	expressed protein
				LOC_Os02g15060	zinc finger, C3HC4 type domain containing protein, expressed
				LOC_Os02g15070	glutelin, putative, expressed
				LOC_Os02g15080	zinc finger, C3HC4 type domain containing protein, expressed
				LOC_Os02g15090	glutelin, putative, expressed
				LOC_Os02g15100	zinc finger, C3HC4 type domain containing protein, expressed
				LOC_Os02g15110	zinc finger, C3HC4 type domain containing protein, expressed
				LOC_Os02g15120	RING-H2 finger protein, putative, expressed
				LOC_Os02g15130	expressed protein
				LOC_Os02g15150	glutelin, putative, expressed
				LOC_Os02g15160	OsFBX40 - F-box domain containing protein, expressed
				LOC_Os02g15169	glutelin, putative, expressed
				LOC_Os02g15178	glutelin, putative, expressed
				LOC_Os02g15200	expressed protein
				LOC_Os02g15210	hypothetical protein
				LOC_Os02g15220	bromodomain containing protein, expressed
				LOC_Os02g15230	GDSL-like lipase/acylhydrolase, putative, expressed
				LOC_Os02g15250	late embryogenesis abundant domain-containing protein, putative, expressed
				LOC_Os02g15260	expressed protein
				LOC_Os02g15270	tyrosine-protein phosphatase YVH1, putative, expressed
				LOC_Os02g15280	VQ domain containing protein, putative, expressed
				LOC_Os02g15290	VQ domain containing protein, putative, expressed
				LOC_Os02g15300	expressed protein
				LOC_Os02g15310	RNA recognition motif containing protein, expressed
				LOC_Os02g15330	transposon protein, putative, CACTA, En/Spm sub-class, expressed
				LOC_Os02g15340	no apical meristem protein, putative, expressed
				LOC_Os02g15350	dof zinc finger domain containing protein, putative, expressed
				LOC_Os02g15360	expressed protein
				LOC_Os02g15370	hypothetical protein
				LOC_Os02g15390	BED zinc finger family protein, expressed
				LOC_Os02g15410	hypothetical protein
				LOC_Os02g15420	hypothetical protein
				LOC_Os02g15430	expressed protein
				LOC_Os02g15440	hypothetical protein
				LOC_Os02g15460	expressed protein
				LOC_Os02g15490	transposon protein, putative, CACTA, En/Spm sub-class, expressed
				LOC_Os02g15500	plant protein of unknown function domain containing protein, expressed
				LOC_Os02g15510	BED zinc finger family protein, expressed
				LOC_Os02g15530	hypothetical protein
				LOC_Os02g15540	expressed protein
				LOC_Os02g15550	spermidine synthase, putative, expressed
				LOC_Os02g15570	expressed protein
				LOC_Os02g15580	cyclic nucleotide-gated ion channel 1, putative, expressed
				LOC_Os02g15594	protein phosphatase 2C, putative, expressed
				LOC_Os02g15610	40S ribosomal protein S15a, putative, expressed
				LOC_Os02g15620	CAPIP1, putative, expressed
				LOC_Os02g15640	CAPIP1, putative, expressed
				LOC_Os02g15660	tetratricopeptide repeat, putative, expressed
				LOC_Os02g15670	expressed protein
				LOC_Os02g15680	hypothetical protein
				LOC_Os02g15690	polygalacturonase, putative, expressed
				LOC_Os02g15700	expressed protein
				LOC_Os02g15704	expressed protein
				LOC_Os02g15710	plastocyanin-like domain containing protein, putative, expressed
				LOC_Os02g15730	plastocyanin-like domain containing protein, putative, expressed
				LOC_Os02g15740	expressed protein
				LOC_Os02g15750	expressed protein
				LOC_Os02g15760	helix-loop-helix DNA-binding domain containing protein, expressed
				LOC_Os02g15770	expressed protein
qRTL5.01	5	1109689	1278582	LOC_Os05g02990	expressed protein
				LOC_Os05g03000	inner membrane protein alx, putative, expressed
				LOC_Os05g03010	expressed protein
				LOC_Os05g03020	ZOS5-03 - C2H2 zinc finger protein, expressed
				LOC_Os05g03030	50S ribosomal protein L10, chloroplast precursor, putative, expressed
				LOC_Os05g03040	AP2 domain containing protein, expressed
				LOC_Os05g03050	DNA repair protein Rad51, putative, expressed
				LOC_Os05g03060	expressed protein
				LOC_Os05g03070	transporter, putative, expressed
				LOC_Os05g03080	expressed protein
				LOC_Os05g03100	HECT-domain domain containing protein, expressed
				LOC_Os05g03110	PWWP domain containing protein, expressed
				LOC_Os05g03120	retrotransposon protein, putative, unclassified, expressed
				LOC_Os05g03130	OsRCI2-7 - Putative low temperature and salt responsive protein, expressed
				LOC_Os05g03140	tetraspanin family protein, putative, expressed
				LOC_Os05g03150	expressed protein
				LOC_Os05g03160	DUF260 domain containing protein, putative, expressed
qRTL5.06	5	6448396	6763151	LOC_Os05g11428	expressed protein
				LOC_Os05g11460	expressed protein
				LOC_Os05g11470	expressed protein
				LOC_Os05g11490	expressed protein
				LOC_Os05g11500	expressed protein
				LOC_Os05g11510	B-box zinc finger family protein, putative, expressed
				LOC_Os05g11520	zinc knuckle family protein, expressed
				LOC_Os05g11530	hypothetical protein
				LOC_Os05g11540	expressed protein
				LOC_Os05g11550	serine/threonine protein phosphatase 5, putative, expressed
				LOC_Os05g11560	aquaporin protein, putative, expressed
				LOC_Os05g11570	NLI interacting factor-like phosphatase, putative, expressed
				LOC_Os05g11580	expressed protein
				LOC_Os05g11590	expressed protein
				LOC_Os05g11600	expressed protein
				LOC_Os05g11610	expressed protein
				LOC_Os05g11620	expressed protein
				LOC_Os05g11630	expressed protein
				LOC_Os05g11640	hypothetical protein
				LOC_Os05g11650	GIL1, putative, expressed
				LOC_Os05g11660	expressed protein
				LOC_Os05g11680	retrotransposon protein, putative, unclassified
				LOC_Os05g11700	PPR repeat containing protein, expressed
				LOC_Os05g11710	ribosomal protein L5, putative, expressed
				LOC_Os05g11720	zinc finger, C3HC4 type domain containing protein, expressed
				LOC_Os05g11730	CGMC_GSK.7 - CGMC includes CDA, MAPK, GSK3, and CLKC kinases, expressed
				LOC_Os05g11740	hypothetical protein
				LOC_Os05g11750	protein kinase, putative, expressed
				LOC_Os05g11760	hypothetical protein
				LOC_Os05g11770	ulp1 protease family protein, putative, expressed
				LOC_Os05g11780	mitochondrial carrier protein, putative, expressed
				LOC_Os05g11790	CAMK_KIN1/SNF1/Nim1_like.19 - CAMK includes calcium/calmodulin depedent protein kinases, expressed
				LOC_Os05g11810	gibberellin 2-beta-dioxygenase 1, putative, expressed
				LOC_Os05g11840	expressed protein
				LOC_Os05g11850	glycosyl hydrolase family 47 domain contain protein, expressed
				LOC_Os05g11860	zinc finger, C3HC4 type domain containing protein, expressed
qRTL6.07	6	7182868	7971133	LOC_Os06g13090	armadillo/beta-catenin repeat family protein, putative, expressed
				LOC_Os06g13100	CREG1 precursor, putative, expressed
				LOC_Os06g13120	expressed protein
				LOC_Os06g13130	expressed protein
				LOC_Os06g13140	WD domain, G-beta repeat domain containing protein, expressed
				LOC_Os06g13150	hypothetical protein
				LOC_Os06g13160	viral-response family protein, expressed
				LOC_Os06g13170	expressed protein
				LOC_Os06g13180	metalloendoproteinase 1 precursor, putative, expressed
				LOC_Os06g13190	expressed protein
				LOC_Os06g13200	proton-dependent oligopeptide transport, putative, expressed
				LOC_Os06g13210	peptide transporter PTR2, putative, expressed
				LOC_Os06g13215	growth regulator related protein, putative, expressed
				LOC_Os06g13220	expressed protein
				LOC_Os06g13230	expressed protein
				LOC_Os06g13240	BURP domain containing protein, expressed
				LOC_Os06g13250	hypothetical protein
				LOC_Os06g13280	O-methyltransferase, putative, expressed
				LOC_Os06g13310	SAM dependent carboxyl methyltransferase, putative, expressed
				LOC_Os06g13320	protein kinase, putative, expressed
				LOC_Os06g13330	expressed protein
				LOC_Os06g13340	expressed protein
				LOC_Os06g13350	SAM dependent carboxyl methyltransferase, putative, expressed
				LOC_Os06g13370	transposon protein, putative, CACTA, En/Spm sub-class, expressed
				LOC_Os06g13380	expressed protein
				LOC_Os06g13390	SAM dependent carboxyl methyltransferase, putative, expressed
				LOC_Os06g13410	OsSCP33 - Putative Serine Carboxypeptidase homologue, expressed
				LOC_Os06g13420	OsSCP34 - Putative Serine Carboxypeptidase homologue, expressed
				LOC_Os06g13440	expressed protein
				LOC_Os06g13450	cystathionine beta-lyase, putative, expressed
				LOC_Os06g13460	SAM dependent carboxyl methyltransferase family protein, putative, expressed
				LOC_Os06g13470	SAM dependent carboxyl methyltransferase, putative, expressed
				LOC_Os06g13480	expressed protein
				LOC_Os06g13490	SAM dependent carboxyl methyltransferase domain containing protein, expressed
				LOC_Os06g13510	SAM dependent carboxyl methyltransferase family protein, putative
				LOC_Os06g13520	SAM dependent carboxyl methyltransferase domain containing protein, expressed
				LOC_Os06g13530	benzoate carboxyl methyltransferase, putative, expressed
				LOC_Os06g13550	SAM dependent carboxyl methyltransferase family protein, putative, expressed
				LOC_Os06g13560	SAM dependent carboxyl methyltransferase, putative, expressed
				LOC_Os06g13570	expressed protein
				LOC_Os06g13580	expressed protein
				LOC_Os06g13590	PE-PGRS family protein, putative, expressed
				LOC_Os06g13600	HEAT repeat family protein, putative, expressed
				LOC_Os06g13610	expressed protein
				LOC_Os06g13620	expressed protein
				LOC_Os06g13640	expressed protein
				LOC_Os06g13650	alpha-mannosidase 2, putative, expressed
				LOC_Os06g13660	alanyl-tRNA synthetase, putative, expressed
				LOC_Os06g13670	E2F family transcription factor protein, putative, expressed
				LOC_Os06g13680	B12D protein, putative, expressed
				LOC_Os06g13690	expressed protein
				LOC_Os06g13700	hypothetical protein
				LOC_Os06g13710	glycosyltransferase, putative, expressed
				LOC_Os06g13720	dehydrogenase E1 component domain containing protein, expressed
				LOC_Os06g13730	glutamate receptor precursor, putative, expressed
				LOC_Os06g13740	transposon protein, putative, unclassified, expressed
				LOC_Os06g13750	expressed protein
				LOC_Os06g13760	glycosyl transferase 8 domain containing protein, putative, expressed
				LOC_Os06g13780	expressed protein
				LOC_Os06g13800	expressed protein
				LOC_Os06g13810	pyrophosphate--fructose 6-phosphate 1-phosphotransferase subunit beta, putative, expressed
				LOC_Os06g13820	dynamin, putative, expressed
				LOC_Os06g13830	endoglucanase, putative, expressed
				LOC_Os06g13839	RNA recognition motif containing protein, putative, expressed
				LOC_Os06g13850	OsFBX193 - F-box domain containing protein, expressed
				LOC_Os06g13860	RCD1, putative, expressed
				LOC_Os06g13870	U-box protein CMPG1, putative, expressed
				LOC_Os06g13880	expressed protein
				LOC_Os06g13890	expressed protein
				LOC_Os06g13900	transposon protein, putative, unclassified, expressed
				LOC_Os06g13910	expressed protein
				LOC_Os06g13940	expressed protein
				LOC_Os06g13950	pentatricopeptide, putative, expressed
				LOC_Os06g13960	OsFBX194 - F-box domain containing protein, expressed
				LOC_Os06g13980	hypothetical protein
				LOC_Os06g13990	OsFBX195 - F-box domain containing protein, expressed
				LOC_Os06g13999	RNA recognition motif containing protein, putative, expressed
				LOC_Os06g14010	myb-like DNA-binding domain containing protein, expressed
				LOC_Os06g14020	expressed protein
				LOC_Os06g14030	potassium channel SKOR, putative, expressed
				LOC_Os06g14040	ThiF family domain containing protein, putative, expressed
				LOC_Os06g14050	membrane attack complex component/perforin/complement C9, putative, expressed
				LOC_Os06g14060	MBTB10 - Bric-a-Brac, Tramtrack, Broad Complex BTB domain with Meprin and TRAF Homology MATH domain, expressed
				LOC_Os06g14070	DUF581 domain containing protein, expressed
				LOC_Os06g14080	ATMAP70 protein, putative, expressed
				LOC_Os06g14090	expressed protein
				LOC_Os06g14100	transposon protein, putative, CACTA, En/Spm sub-class, expressed
				LOC_Os06g14130	retrotransposon protein, putative, Ty3-gypsy subclass, expressed
				LOC_Os06g14170	expressed protein
				LOC_Os06g14180	expressed protein
				LOC_Os06g14190	NF-X1-type zinc finger protein, putative, expressed
				LOC_Os06g14200	zinc finger, C3HC4 type domain containing protein, expressed
				LOC_Os06g14210	expressed protein
				LOC_Os06g14220	STF-1, putative, expressed
				LOC_Os06g14230	expressed protein
				LOC_Os06g14240	hsp20/alpha crystallin family protein, putative, expressed
				LOC_Os06g14260	lectin-like receptor kinase, putative, expressed
				LOC_Os06g14280	cysteine-rich repeat secretory protein precursor, putative, expressed
qRSR4.28	4	28487153	29482850	LOC_Os04g47912	expressed protein
				LOC_Os04g47920	expressed protein
				LOC_Os04g47930	aluminum-activated malate transporter, putative, expressed
				LOC_Os04g47950	expressed protein
				LOC_Os04g47960	expressed protein
				LOC_Os04g47970	ORM1, putative, expressed
				LOC_Os04g47990	dof zinc finger domain containing protein, putative, expressed
				LOC_Os04g48000	hypothetical protein
				LOC_Os04g48010	WD-40 repeat family protein, putative, expressed
				LOC_Os04g48020	3-hexulose-6-phosphate isomerase, putative, expressed
				LOC_Os04g48030	heat stress transcription factor B-1, putative, expressed
				LOC_Os04g48040	expressed protein
				LOC_Os04g48050	RING zinc finger protein, putative, expressed
				LOC_Os04g48060	RFC2 - Putative clamp loader of PCNA, replication factor C subunit 2, expressed
				LOC_Os04g48070	homeobox and START domains containing protein, putative, expressed
				LOC_Os04g48130	OsRhmbd11 - Putative Rhomboid homologue, expressed
				LOC_Os04g48140	methyltransferase, putative, expressed
				LOC_Os04g48160	IQ calmodulin-binding motif family protein, putative, expressed
				LOC_Os04g48170	cytochrome P450, putative, expressed
				LOC_Os04g48180	expressed protein
				LOC_Os04g48190	hypothetical protein
				LOC_Os04g48200	cytochrome P450, putative, expressed
				LOC_Os04g48210	cytochrome P450, putative, expressed
				LOC_Os04g48220	expressed protein
				LOC_Os04g48230	dehydration response related protein, putative, expressed
				LOC_Os04g48250	expressed protein
				LOC_Os04g48260	zinc RING finger protein, putative, expressed
				LOC_Os04g48270	OsFBX148 - F-box domain containing protein, expressed
				LOC_Os04g48280	expressed protein
				LOC_Os04g48290	MATE efflux family protein, putative, expressed
				LOC_Os04g48300	hypothetical protein
				LOC_Os04g48310	RING-H2 finger protein, putative, expressed
				LOC_Os04g48320	expressed protein
				LOC_Os04g48330	ethylene-responsive transcription factor ERF027, putative, expressed
				LOC_Os04g48350	dehydration-responsive element-binding protein, putative, expressed
				LOC_Os04g48360	expressed protein
				LOC_Os04g48370	RNA polymerase IV subunit, putative, expressed
				LOC_Os04g48375	WD domain, G-beta repeat domain containing protein, expressed
				LOC_Os04g48380	lysM domain containing protein, putative, expressed
				LOC_Os04g48390	uncharacterized membrane protein, putative, expressed
				LOC_Os04g48400	HOTHEAD precursor, putative, expressed
				LOC_Os04g48410	copper chaperone for superoxide dismutase, putative, expressed
				LOC_Os04g48416	OsSub45 - Putative Subtilisin homologue, expressed
				LOC_Os04g48440	expressed protein
				LOC_Os04g48450	expressed protein
				LOC_Os04g48460	cytochrome P450, putative, expressed
				LOC_Os04g48470	expressed protein
				LOC_Os04g48480	exostosin family domain containing protein, expressed
				LOC_Os04g48484	expressed protein
				LOC_Os04g48490	fasciclin-like arabinogalactan protein, putative, expressed
				LOC_Os04g48500	expressed protein
				LOC_Os04g48510	growth regulating factor protein, putative, expressed
				LOC_Os04g48520	ZOS4-12 - C2H2 zinc finger protein, expressed
				LOC_Os04g48530	C4-dicarboxylate transporter/malic acid transport protein domain containing protein, expressed
				LOC_Os04g48540	dihydrodipicolinate synthase, chloroplast precursor, putative, expressed
				LOC_Os04g48570	conserved hypothetical protein
				LOC_Os04g48600	expressed protein
				LOC_Os04g48630	expressed protein
				LOC_Os04g48690	expressed protein
				LOC_Os04g48700	TruB family pseudouridylate synthase, putative, expressed
				LOC_Os04g48710	expressed protein
				LOC_Os04g48720	expressed protein
				LOC_Os04g48730	expressed protein
				LOC_Os04g48740	hypothetical protein
				LOC_Os04g48750	3-oxo-5-alpha-steroid 4-dehydrogenase, putative, expressed
				LOC_Os04g48760	leucine-rich repeat family protein, putative, expressed
				LOC_Os04g48770	ubiquitin fusion degradation protein, putative, expressed
				LOC_Os04g48790	rhoGAP domain containing protein, expressed
				LOC_Os04g48800	GDSL-like lipase/acylhydrolase, putative, expressed
				LOC_Os04g48810	expressed protein
				LOC_Os04g48820	deoxyribonuclease tatD, putative, expressed
				LOC_Os04g48830	DUF623 domain containing protein, expressed
				LOC_Os04g48840	expressed protein
				LOC_Os04g48850	aminotransferase, classes I and II, domain containing protein, expressed
				LOC_Os04g48870	nitrilase-associated protein, putative, expressed
				LOC_Os04g48880	fatty acid hydroxylase, putative, expressed
				LOC_Os04g48890	hypothetical protein
				LOC_Os04g48920	retrotransposon protein, putative, unclassified, expressed
				LOC_Os04g48930	ferric-chelate reductase, putative, expressed
				LOC_Os04g48940	uncharacterized mscS family protein, putative, expressed
				LOC_Os04g48950	fringe-related protein, putative, expressed
				LOC_Os04g48960	expressed protein
				LOC_Os04g48980	hypothetical protein
				LOC_Os04g49000	zinc finger, C3HC4 type domain containing protein, expressed
				LOC_Os04g49040	retrotransposon protein, putative, unclassified, expressed
				LOC_Os04g49050	expressed protein
				LOC_Os04g49060	H-BTB3 - Bric-a-Brac, Tramtrack, Broad Complex BTB domain with H family conserved sequence, expressed
				LOC_Os04g49070	transposon protein, putative, CACTA, En/Spm sub-class, expressed
				LOC_Os04g49080	rRNA 2-O-methyltransferase fibrillarin, putative, expressed
				LOC_Os04g49110	GRAS family transcription factor domain containing protein, expressed
				LOC_Os04g49130	ubiquitin-conjugating enzyme, putative, expressed
				LOC_Os04g49140	expressed protein
				LOC_Os04g49150	OsMADS17 - MADS-box family gene with MIKCc type-box, expressed
				LOC_Os04g49160	zinc finger, C3HC4 type domain containing protein, expressed
				LOC_Os04g49170	zinc finger, C3HC4 type domain containing protein, expressed
				LOC_Os04g49180	expressed protein
				LOC_Os04g49194	naringenin,2-oxoglutarate 3-dioxygenase, putative, expressed
				LOC_Os04g49210	naringenin,2-oxoglutarate 3-dioxygenase, putative, expressed
				LOC_Os04g49220	mitochondrial import inner membrane translocase subunit Tim, putative, expressed
				LOC_Os04g49230	B3 DNA binding domain containing protein, expressed
				LOC_Os04g49240	expressed protein
				LOC_Os04g49250	UDP-glucose/GDP-mannose dehydrogenase family, central domain containing protein, expressed
				LOC_Os04g49260	heavy metal-associated domain containing protein, expressed
				LOC_Os04g49270	tRNA-splicing endonuclease positive effector-related, putative, expressed
				LOC_Os04g49280	retrotransposon protein, putative, unclassified, expressed
				LOC_Os04g49310	tRNA-splicing endonuclease positive effector-related, putative, expressed
				LOC_Os04g49320	tRNA-splicing endonuclease positive effector-related, putative, expressed
				LOC_Os04g49340	tRNA-splicing endonuclease positive effector-related, putative, expressed
				LOC_Os04g49350	PPR repeat domain containing protein, putative, expressed
				LOC_Os04g49360	OsFBX149 - F-box domain containing protein, expressed
				LOC_Os04g49370	expressed protein
				LOC_Os04g49394	ulp1 protease family, C-terminal catalytic domain containing protein, expressed
qRSR5.01	5	1065077	1109689	LOC_Os05g02920	expressed protein
				LOC_Os05g02940	calcium-transporting ATPase 2, endoplasmic reticulum-type, putative, expressed
				LOC_Os05g02970	expressed protein
qRSR6.07	6	7182868	7971133	LOC_Os06g13090	armadillo/beta-catenin repeat family protein, putative, expressed
				LOC_Os06g13100	CREG1 precursor, putative, expressed
				LOC_Os06g13120	expressed protein
				LOC_Os06g13130	expressed protein
				LOC_Os06g13140	WD domain, G-beta repeat domain containing protein, expressed
				LOC_Os06g13150	hypothetical protein
				LOC_Os06g13160	viral-response family protein, expressed
				LOC_Os06g13170	expressed protein
				LOC_Os06g13180	metalloendoproteinase 1 precursor, putative, expressed
				LOC_Os06g13190	expressed protein
				LOC_Os06g13200	proton-dependent oligopeptide transport, putative, expressed
				LOC_Os06g13210	peptide transporter PTR2, putative, expressed
				LOC_Os06g13215	growth regulator related protein, putative, expressed
				LOC_Os06g13220	expressed protein
				LOC_Os06g13230	expressed protein
				LOC_Os06g13240	BURP domain containing protein, expressed
				LOC_Os06g13250	hypothetical protein
				LOC_Os06g13280	O-methyltransferase, putative, expressed
				LOC_Os06g13310	SAM dependent carboxyl methyltransferase, putative, expressed
				LOC_Os06g13320	protein kinase, putative, expressed
				LOC_Os06g13330	expressed protein
				LOC_Os06g13340	expressed protein
				LOC_Os06g13350	SAM dependent carboxyl methyltransferase, putative, expressed
				LOC_Os06g13370	transposon protein, putative, CACTA, En/Spm sub-class, expressed
				LOC_Os06g13380	expressed protein
				LOC_Os06g13390	SAM dependent carboxyl methyltransferase, putative, expressed
				LOC_Os06g13410	OsSCP33 - Putative Serine Carboxypeptidase homologue, expressed
				LOC_Os06g13420	OsSCP34 - Putative Serine Carboxypeptidase homologue, expressed
				LOC_Os06g13440	expressed protein
				LOC_Os06g13450	cystathionine beta-lyase, putative, expressed
				LOC_Os06g13460	SAM dependent carboxyl methyltransferase family protein, putative, expressed
				LOC_Os06g13470	SAM dependent carboxyl methyltransferase, putative, expressed
				LOC_Os06g13480	expressed protein
				LOC_Os06g13490	SAM dependent carboxyl methyltransferase domain containing protein, expressed
				LOC_Os06g13510	SAM dependent carboxyl methyltransferase family protein, putative
				LOC_Os06g13520	SAM dependent carboxyl methyltransferase domain containing protein, expressed
				LOC_Os06g13530	benzoate carboxyl methyltransferase, putative, expressed
				LOC_Os06g13550	SAM dependent carboxyl methyltransferase family protein, putative, expressed
				LOC_Os06g13560	SAM dependent carboxyl methyltransferase, putative, expressed
				LOC_Os06g13570	expressed protein
				LOC_Os06g13580	expressed protein
				LOC_Os06g13590	PE-PGRS family protein, putative, expressed
				LOC_Os06g13600	HEAT repeat family protein, putative, expressed
				LOC_Os06g13610	expressed protein
				LOC_Os06g13620	expressed protein
				LOC_Os06g13640	expressed protein
				LOC_Os06g13650	alpha-mannosidase 2, putative, expressed
				LOC_Os06g13660	alanyl-tRNA synthetase, putative, expressed
				LOC_Os06g13670	E2F family transcription factor protein, putative, expressed
				LOC_Os06g13680	B12D protein, putative, expressed
				LOC_Os06g13690	expressed protein
				LOC_Os06g13700	hypothetical protein
				LOC_Os06g13710	glycosyltransferase, putative, expressed
				LOC_Os06g13720	dehydrogenase E1 component domain containing protein, expressed
				LOC_Os06g13730	glutamate receptor precursor, putative, expressed
				LOC_Os06g13740	transposon protein, putative, unclassified, expressed
				LOC_Os06g13750	expressed protein
				LOC_Os06g13760	glycosyl transferase 8 domain containing protein, putative, expressed
				LOC_Os06g13780	expressed protein
				LOC_Os06g13800	expressed protein
				LOC_Os06g13810	pyrophosphate--fructose 6-phosphate 1-phosphotransferase subunit beta, putative, expressed
				LOC_Os06g13820	dynamin, putative, expressed
				LOC_Os06g13830	endoglucanase, putative, expressed
				LOC_Os06g13839	RNA recognition motif containing protein, putative, expressed
				LOC_Os06g13850	OsFBX193 - F-box domain containing protein, expressed
				LOC_Os06g13860	RCD1, putative, expressed
				LOC_Os06g13870	U-box protein CMPG1, putative, expressed
				LOC_Os06g13880	expressed protein
				LOC_Os06g13890	expressed protein
				LOC_Os06g13900	transposon protein, putative, unclassified, expressed
				LOC_Os06g13910	expressed protein
				LOC_Os06g13940	expressed protein
				LOC_Os06g13950	pentatricopeptide, putative, expressed
				LOC_Os06g13960	OsFBX194 - F-box domain containing protein, expressed
				LOC_Os06g13980	hypothetical protein
				LOC_Os06g13990	OsFBX195 - F-box domain containing protein, expressed
				LOC_Os06g13999	RNA recognition motif containing protein, putative, expressed
				LOC_Os06g14010	myb-like DNA-binding domain containing protein, expressed
				LOC_Os06g14020	expressed protein
				LOC_Os06g14030	potassium channel SKOR, putative, expressed
				LOC_Os06g14040	ThiF family domain containing protein, putative, expressed
				LOC_Os06g14050	membrane attack complex component/perforin/complement C9, putative, expressed
				LOC_Os06g14060	MBTB10 - Bric-a-Brac, Tramtrack, Broad Complex BTB domain with Meprin and TRAF Homology MATH domain, expressed
				LOC_Os06g14070	DUF581 domain containing protein, expressed
				LOC_Os06g14080	ATMAP70 protein, putative, expressed
				LOC_Os06g14090	expressed protein
				LOC_Os06g14100	transposon protein, putative, CACTA, En/Spm sub-class, expressed
				LOC_Os06g14130	retrotransposon protein, putative, Ty3-gypsy subclass, expressed
				LOC_Os06g14170	expressed protein
				LOC_Os06g14180	expressed protein
				LOC_Os06g14190	NF-X1-type zinc finger protein, putative, expressed
				LOC_Os06g14200	zinc finger, C3HC4 type domain containing protein, expressed
				LOC_Os06g14210	expressed protein
				LOC_Os06g14220	STF-1, putative, expressed
				LOC_Os06g14230	expressed protein
				LOC_Os06g14240	hsp20/alpha crystallin family protein, putative, expressed
				LOC_Os06g14260	lectin-like receptor kinase, putative, expressed
				LOC_Os06g14280	cysteine-rich repeat secretory protein precursor, putative, expressed
qRSR6.28	6	28968690	30052494	LOC_Os06g47890	OsFBO9 - F-box and other domain containing protein, expressed
				LOC_Os06g47900	expressed protein
				LOC_Os06g47910	GDSL-like lipase/acylhydrolase, putative, expressed
				LOC_Os06g47920	pentatricopeptide repeat domain containing protein, putative, expressed
				LOC_Os06g47930	expressed protein
				LOC_Os06g47940	nifU, putative, expressed
				LOC_Os06g47950	tetratricopeptide-like helical, putative, expressed
				LOC_Os06g47960	nucleic acid binding protein, putative, expressed
				LOC_Os06g47970	expressed protein
				LOC_Os06g47980	expressed protein
				LOC_Os06g48000	peroxidase precursor, putative, expressed
				LOC_Os06g48010	peroxidase precursor, putative, expressed
				LOC_Os06g48020	peroxidase precursor, putative, expressed
				LOC_Os06g48030	peroxidase precursor, putative, expressed
				LOC_Os06g48040	zinc finger, C3HC4 type domain containing protein, expressed
				LOC_Os06g48050	expressed protein
				LOC_Os06g48060	ABC transporter, ATP-binding protein, putative, expressed
				LOC_Os06g48065	Zinc finger, C3HC4 type domain containing protein, expressed
				LOC_Os06g48150	expressed protein
				LOC_Os06g48160	glycosyl hydrolases family 16, putative, expressed
				LOC_Os06g48170	glycosyl hydrolases family 16, putative, expressed
				LOC_Os06g48180	glycosyl hydrolases family 16, putative, expressed
				LOC_Os06g48190	expressed protein
				LOC_Os06g48200	glycosyl hydrolases family 16, putative, expressed
				LOC_Os06g48210	DEAD-box ATP-dependent RNA helicase, putative, expressed
				LOC_Os06g48220	expressed protein
				LOC_Os06g48230	DNA-directed RNA polymerases I, II, and III subunit RPABC3, putative, expressed
				LOC_Os06g48235	expressed protein
				LOC_Os06g48240	AAA ATPase, putative, expressed
				LOC_Os06g48250	ATPase, putative, expressed
				LOC_Os06g48260	expressed protein
				LOC_Os06g48270	expressed protein
				LOC_Os06g48280	expressed protein
				LOC_Os06g48290	homeobox associated leucine zipper, putative, expressed
				LOC_Os06g48300	protein phosphatase 2C, putative, expressed
				LOC_Os06g48310	RNA recognition motif containing protein, expressed
				LOC_Os06g48320	EDR2, putative, expressed
				LOC_Os06g48330	ATEXO70G1, putative, expressed
				LOC_Os06g48340	hypothetical protein
				LOC_Os06g48350	CPuORF14 - conserved peptide uORF-containing transcript, expressed
				LOC_Os06g48355	expressed protein
				LOC_Os06g48450	retrotransposon protein, putative, Ty3-gypsy subclass
				LOC_Os06g48460	retrotransposon protein, putative, Ty3-gypsy subclass, expressed
				LOC_Os06g48500	expressed protein
				LOC_Os06g48510	choline monooxygenase, chloroplast precursor, putative, expressed
				LOC_Os06g48520	disease resistance protein RPM1, putative, expressed
				LOC_Os06g48530	ZOS6-09 - C2H2 zinc finger protein, expressed
				LOC_Os06g48534	GATA transcription factor 25, putative, expressed
				LOC_Os06g48550	expressed protein
				LOC_Os06g48560	transferase family protein, putative, expressed
				LOC_Os06g48570	Ser/Thr protein phosphatase family protein, putative, expressed
				LOC_Os06g48590	CGMC_MAPKCMGC_2_SLT2y_ERK.2 - CGMC includes CDA, MAPK, GSK3, and CLKC kinases, expressed
				LOC_Os06g48600	macrophage migration inhibitory factor, putative, expressed
				LOC_Os06g48610	CCT motif family protein, expressed
				LOC_Os06g48620	4-amino-4-deoxychorismate synthase, putative, expressed
				LOC_Os06g48630	ANTH/ENTH domain containing protein, putative, expressed
				LOC_Os06g48640	proteasome/cyclosome repeat containing protein, expressed
				LOC_Os06g48650	OsSub52 - Putative Subtilisin homologue, expressed
				LOC_Os06g48660	DEFL21 - Defensin and Defensin-like DEFL family, expressed
				LOC_Os06g48665	expressed protein
				LOC_Os06g48680	expressed protein
				LOC_Os06g48690	DEFL12 - Defensin and Defensin-like DEFL family, expressed
				LOC_Os06g48700	DNA binding protein, putative, expressed
				LOC_Os06g48720	cadmium/zinc-transporting ATPase 4, putative, expressed
				LOC_Os06g48740	expressed protein
				LOC_Os06g48750	DEAD-box ATP-dependent RNA helicase, putative, expressed
				LOC_Os06g48760	UTP--glucose-1-phosphate uridylyltransferase, putative, expressed
				LOC_Os06g48770	OsSBeL1 - Putative Serine Beta-Lactamase homologue, expressed
				LOC_Os06g48780	60S acidic ribosomal protein, putative, expressed
				LOC_Os06g48790	expressed protein
				LOC_Os06g48800	OsHKT2;4 - Na+ transporter, expressed
				LOC_Os06g48810	OsHKT2;1 - Na+ transporter, expressed
				LOC_Os06g48830	hypothetical protein
				LOC_Os06g48850	OsSAUR27 - Auxin-responsive SAUR gene family member, expressed
				LOC_Os06g48860	OsSAUR28 - Auxin-responsive SAUR gene family member, expressed
				LOC_Os06g48870	methyl-binding domain protein MBD, putative, expressed
				LOC_Os06g48880	expressed protein
				LOC_Os06g48920	expressed protein
				LOC_Os06g48930	expressed protein
				LOC_Os06g48940	GHMP kinases ATP-binding protein, putative, expressed
				LOC_Os06g48950	auxin response factor 19, putative, expressed
				LOC_Os06g48960	AIG2-like family domain containing protein, expressed
				LOC_Os06g48970	expressed protein
				LOC_Os06g48980	protein kinase APK1B, chloroplast precursor, putative, expressed
				LOC_Os06g48990	Leucine Rich Repeat family protein, expressed
				LOC_Os06g49000	expressed protein
				LOC_Os06g49010	OsSPL12 - SBP-box gene family member, expressed
				LOC_Os06g49020	26S proteasome non-ATPase regulatory subunit 14, putative, expressed
				LOC_Os06g49030	activator of 90 kDa heat shock protein ATPase homolog, putative, expressed
				LOC_Os06g49040	Myb-like DNA-binding domain containing protein, putative, expressed
				LOC_Os06g49050	hAT dimerisation domain containing protein, expressed
				LOC_Os06g49060	ternary complex factor MIP1, putative, expressed
				LOC_Os06g49070	expressed protein
				LOC_Os06g49080	zinc finger C-x8-C-x5-C-x3-H type family protein, expressed
				LOC_Os06g49100	retrotransposon protein, putative, unclassified, expressed
				LOC_Os06g49110	delta-aminolevulinic acid dehydratase, chloroplast precursor, putative, expressed
				LOC_Os06g49120	Complex I intermediate-associated protein 30 domain containing protein, putative, expressed
				LOC_Os06g49130	TAZ zinc finger family protein, expressed
				LOC_Os06g49140	ribosomal RNA large subunit methyltransferase J, putative, expressed
				LOC_Os06g49150	exostosin, putative, expressed
				LOC_Os06g49160	thylakoid lumenal 16.5 kDa protein, chloroplast precursor, putative, expressed
				LOC_Os06g49170	OsWAK64 - OsWAK receptor-like protein kinase, expressed
				LOC_Os06g49180	plant-specific domain TIGR01589 family protein, putative, expressed
				LOC_Os06g49185	expressed protein
				LOC_Os06g49190	LTPL154 - Protease inhibitor/seed storage/LTP family protein precursor, expressed
				LOC_Os06g49200	expressed protein
				LOC_Os06g49220	peptide transporter, putative, expressed
				LOC_Os06g49230	peptide transporter, putative, expressed
				LOC_Os06g49240	PTR-like peptide transporter, putatuve, expressed
				LOC_Os06g49250	peptide transporter PTR2, putative, expressed
				LOC_Os06g49260	OsWAK65 - OsWAK receptor-like protein kinase, expressed
				LOC_Os06g49290	acanthoscurrin-1 precursor, putative, expressed
				LOC_Os06g49300	glycosyltransferase protein, putative, expressed
				LOC_Os06g49310	MATE efflux family protein, putative, expressed
				LOC_Os06g49320	glycosyltransferase, putative, expressed
				LOC_Os06g49330	expressed protein
				LOC_Os06g49340	OsFBDUF35 - F-box and DUF domain containing protein, expressed
				LOC_Os06g49360	NBS-LRR disease resistance protein, putative, expressed
				LOC_Os06g49380	NBS-LRR disease resistance protein, putative, expressed
				LOC_Os06g49390	NBS-LRR disease resistance protein, putative, expressed
				LOC_Os06g49410	expressed protein
				LOC_Os06g49430	CGMC_MAPKCMGC_2.11 - CGMC includes CDA, MAPK, GSK3, and CLKC kinases, expressed
				LOC_Os06g49440	serine esterase, putative, expressed
				LOC_Os06g49450	expressed protein
				LOC_Os06g49460	Rer1 protein, putative, expressed
				LOC_Os06g49470	peptidyl-prolyl cis-trans isomerase, putative, expressed
				LOC_Os06g49480	peptidyl-prolyl cis-trans isomerase, putative, expressed
				LOC_Os06g49490	ZOS6-10 - C2H2 zinc finger protein, expressed
				LOC_Os06g49500	integral membrane protein, putative, expressed
				LOC_Os06g49505	arogenate dehydrogenase 1, chloroplast precursor, putative, expressed
				LOC_Os06g49510	zinc knuckle family protein, putative, expressed
				LOC_Os06g49520	arogenate dehydrogenase 1, chloroplast precursor, putative, expressed
				LOC_Os06g49530	OsFBX206 - F-box domain containing protein, expressed
				LOC_Os06g49560	transposon protein, putative, CACTA, En/Spm sub-class
				LOC_Os06g49570	expressed protein
				LOC_Os06g49590	hypothetical protein
				LOC_Os06g49600	hypothetical protein
				LOC_Os06g49610	hypothetical protein
				LOC_Os06g49620	expressed protein
				LOC_Os06g49640	uncharacterized UPF0114 domain containing protein, expressed
				LOC_Os06g49650	harpin-induced protein 1 domain containing protein, expressed
qRSR9.10	9	10802084	10898315	LOC_Os09g17670	expressed protein
				LOC_Os09g17680	NAD kinase, putative, expressed
				LOC_Os09g17690	expressed protein
				LOC_Os09g17700	hypothetical protein
				LOC_Os09g17730	proton pump interactor, putative, expressed
				LOC_Os09g17740	chlorophyll A-B binding protein, putative, expressed
				LOC_Os09g17750	oxidoreductase, short chain dehydrogenase/reductase family domain containing protein, expressed
				LOC_Os09g17760	expressed protein
				LOC_Os09g17770	retrotransposon protein, putative, unclassified, expressed
				LOC_Os09g17790	expressed protein
qRSR9.14	9	14050136	14359383	LOC_Os09g23650	FAM10 family protein, putative, expressed
				LOC_Os09g23660	ZIM motif family protein, expressed
				LOC_Os09g23680	expressed protein
				LOC_Os09g23690	UBX domain containing protein, expressed
				LOC_Os09g23700	hypothetical protein
				LOC_Os09g23710	expressed protein
				LOC_Os09g23720	expressed protein
				LOC_Os09g23725	expressed protein
				LOC_Os09g23730	HMG-Y-related protein A, putative, expressed
				LOC_Os09g23740	1-phosphatidylinositol-4-phosphate 5-kinase/ zinc ion binding protein, putative, expressed
				LOC_Os09g23750	expressed protein
				LOC_Os09g23760	hypothetical protein
				LOC_Os09g23770	expressed protein
				LOC_Os09g23780	expressed protein
				LOC_Os09g23820	cytochrome P450 72A1, putative, expressed
				LOC_Os09g23890	hypothetical protein
				LOC_Os09g23894	expressed protein
				LOC_Os09g23899	pollen allergen Cyn d 23, putative, expressed
				LOC_Os09g23908	pollen allergen Cyn d 23, putative, expressed
				LOC_Os09g23930	retrotransposon protein, putative, unclassified, expressed
				LOC_Os09g23939	pollen allergen Cyn d 23, putative
				LOC_Os09g23948	pollen allergen Cyn d 23, putative, expressed
				LOC_Os09g23957	pollen allergen Cyn d 23, putative, expressed
				LOC_Os09g23966	pollen allergen Cyn d 23, putative, expressed
				LOC_Os09g23980	retrotransposon protein, putative, unclassified, expressed
				LOC_Os09g23999	pollen allergen Cyn d 23, putative, expressed
				LOC_Os09g24008	pollen allergen Cyn d 23, putative, expressed
				LOC_Os09g24020	pollen allergen Cyn d 23, putative, expressed
				LOC_Os09g24029	pollen allergen Cyn d 23, putative
				LOC_Os09g24038	pollen allergen Cyn d 23, putative, expressed
				LOC_Os09g24100	pollen allergen Cyn d 23, putative, expressed
				LOC_Os09g24110	pollen allergen Cyn d 23, putative, expressed
				LOC_Os09g24120	pollen allergen Cyn d 23, putative, expressed
				LOC_Os09g24130	pollen allergen Cyn d 23, putative, expressed
				LOC_Os09g24140	pollen allergen Cyn d 23, putative, expressed
				LOC_Os09g24150	retrotransposon protein, putative, unclassified, expressed
				LOC_Os09g24159	pollen allergen Cyn d 23, putative, expressed
				LOC_Os09g24170	expressed protein
qRSR9.18	9	18402360	18643076	LOC_Os09g30240	phosphofructokinase, putative, expressed
				LOC_Os09g30250	OsSub58 - Putative Subtilisin homologue, expressed
				LOC_Os09g30260	expressed protein
				LOC_Os09g30280	glycosyl transferase 8 domain containing protein, putative, expressed
				LOC_Os09g30290	expressed protein
				LOC_Os09g30300	expressed protein
				LOC_Os09g30310	core histone H2A/H2B/H3/H4, putative, expressed
				LOC_Os09g30320	BURP domain containing protein, expressed
				LOC_Os09g30330	phosphatidylinositol transfer, putative, expressed
				LOC_Os09g30340	photosystem I reaction center subunit, chloroplast precursor, putative, expressed
				LOC_Os09g30350	expressed protein
				LOC_Os09g30360	caffeoyl-CoA O-methyltransferase, putative, expressed
				LOC_Os09g30380	AP005392-AK108636 - NBS/LRR genes that are S-rich,divergent TIR, divergent NBS, expressed
				LOC_Os09g30390	expressed protein
				LOC_Os09g30400	WRKY90, expressed
				LOC_Os09g30410	expressed protein
				LOC_Os09g30411	UBX domain-containing protein, putative, expressed
				LOC_Os09g30412	heat shock protein, putative, expressed
				LOC_Os09g30414	aspartic proteinase nepenthesin-2 precursor, putative, expressed
				LOC_Os09g30418	heat shock protein, putative, expressed
				LOC_Os09g30438	expressed protein
				LOC_Os09g30442	expressed protein
				LOC_Os09g30446	transporter, monovalent cation:proton antiporter-2 family, putative, expressed
				LOC_Os09g30454	OsWAK87 - OsWAK receptor-like protein kinase, expressed
				LOC_Os09g30458	subtilisin-like protease, putative, expressed
				LOC_Os09g30462	expressed protein
				LOC_Os09g30466	nuclear ribonuclease Z, putative, expressed
				LOC_Os09g30474	BPI/LBP family protein At3g20270 precursor, putative, expressed
				LOC_Os09g30478	expressed protein
				LOC_Os09g30486	fasciclin domain containing protein, expressed
				LOC_Os09g30490	EF hand family protein, expressed
				LOC_Os09g30498	expressed protein
				LOC_Os09g30506	EF hand family protein, expressed
qDW1.38	1	38286772	39460409	LOC_Os01g65950	thioesterase family protein, putative, expressed
				LOC_Os01g65970	transcription factor HBP-1b, putative, expressed
				LOC_Os01g65986	DUF803 domain containing, putative, expressed
				LOC_Os01g65992	expressed protein
				LOC_Os01g66000	NADH dehydrogenase I subunit N, putative, expressed
				LOC_Os01g66010	amino acid transporter, putative, expressed
				LOC_Os01g66020	protein kinase family protein, putative, expressed
				LOC_Os01g66030	OsMADS2 - MADS-box family gene with MIKCc type-box, expressed
				LOC_Os01g66040	receptor kinase, putative, expressed
				LOC_Os01g66050	wound-responsive family protein, putative, expressed
				LOC_Os01g66060	expressed protein
				LOC_Os01g66070	PHD-finger domain containing protein, putative
				LOC_Os01g66100	gibberellin 20 oxidase 2, putative, expressed
				LOC_Os01g66110	methyltransferase, putative, expressed
				LOC_Os01g66120	No apical meristem protein, putative, expressed
				LOC_Os01g66130	armadillo/beta-catenin repeat family protein, putative, expressed
				LOC_Os01g66140	plus-3 domain containing protein, putative, expressed
				LOC_Os01g66150	expressed protein
				LOC_Os01g66160	pentatricopeptide, putative, expressed
				LOC_Os01g66170	SNARE associated Golgi protein, putative, expressed
				LOC_Os01g66180	cytochrome c, putative, expressed
				LOC_Os01g66190	expressed protein
				LOC_Os01g66200	expressed protein
				LOC_Os01g66230	csAtPR5, putative, expressed
				LOC_Os01g66240	mitochondrion protein, putative, expressed
				LOC_Os01g66250	S-locus-like receptor protein kinase, putative, expressed
				LOC_Os01g66260	expressed protein
				LOC_Os01g66270	AP2 domain containing protein, expressed
				LOC_Os01g66280	transcriptional regulator, putative, expressed
				LOC_Os01g66290	OsMADS21 - MADS-box family gene with MIKCc type-box, expressed
				LOC_Os01g66300	KH domain containing protein, putative, expressed
				LOC_Os01g66310	expressed protein
				LOC_Os01g66320	expressed protein
				LOC_Os01g66330	ATP-dependent Clp protease ATP-binding subunit clpX, putative, expressed
				LOC_Os01g66340	expressed protein
				LOC_Os01g66350	DUF647 domain containing protein, putative, expressed
				LOC_Os01g66360	2-C-methyl-D-erythritol 4-phosphate cytidylyltransferase, putative, expressed
				LOC_Os01g66379	expressed protein
				LOC_Os01g66400	expressed protein
				LOC_Os01g66410	expressed protein
				LOC_Os01g66420	PHD finger protein, putative, expressed
				LOC_Os01g66440	expressed protein
				LOC_Os01g66450	retrotransposon protein, putative, unclassified, expressed
				LOC_Os01g66480	expressed protein
				LOC_Os01g66490	no apical meristem protein, putative, expressed
				LOC_Os01g66500	phosphoribosylformylglycinamidine synthase, putative, expressed
				LOC_Os01g66510	MLO domain containing protein, putative, expressed
				LOC_Os01g66520	serine/threonine-protein kinase RIO-like, putative, expressed
				LOC_Os01g66530	ARGOS, putative, expressed
				LOC_Os01g66544	expressed protein
				LOC_Os01g66560	signal recognition particle 72 kDa protein, putative, expressed
				LOC_Os01g66570	ZOS1-19 - C2H2 zinc finger protein, expressed
				LOC_Os01g66580	RNA polymerase III RPC4 domain containing protein, expressed
				LOC_Os01g66590	DUF260 domain containing protein, putative, expressed
				LOC_Os01g66600	rhodanese-like, putative, expressed
				LOC_Os01g66610	serine/threonine-protein kinase receptor precursor, putative, expressed
				LOC_Os01g66620	glucosyltransferase, putative, expressed
				LOC_Os01g66630	S-domain receptor-like protein kinase, putative, expressed
				LOC_Os01g66640	S-domain receptor-like protein kinase, putative, expressed
				LOC_Os01g66650	expressed protein
				LOC_Os01g66660	expressed protein
				LOC_Os01g66670	expressed protein
				LOC_Os01g66680	S-domain receptor-like protein kinase, putative, expressed
				LOC_Os01g66690	ZIP4/SPO22, putative, expressed
				LOC_Os01g66700	beta-hexosaminidase precursor, putative, expressed
				LOC_Os01g66710	polygalacturonase, putative, expressed
				LOC_Os01g66720	NADP-dependent oxidoreductase, putative, expressed
				LOC_Os01g66730	exosome complex exonuclease RRP40, putative, expressed
				LOC_Os01g66740	inactive receptor kinase At1g27190 precursor, putative, expressed
				LOC_Os01g66760	inactive receptor kinase At2g26730 precursor, putative, expressed
				LOC_Os01g66800	expressed protein
				LOC_Os01g66810	expressed protein
				LOC_Os01g66820	inactive receptor kinase At1g27190 precursor, putative, expressed
				LOC_Os01g66830	pectinacetylesterase domain containing protein, expressed
				LOC_Os01g66840	pectinacetylesterase domain containing protein, expressed
				LOC_Os01g66850	pectinacetylesterase domain containing protein, expressed
				LOC_Os01g66860	serine/threonine protein kinase, putative, expressed
				LOC_Os01g66890	BTBZ1 - Bric-a-Brac, Tramtrack, and Broad Complex BTB domain with TAZ zinc finger and Calmodulin-binding domains, expressed
				LOC_Os01g66900	expressed protein
				LOC_Os01g66910	expressed protein
				LOC_Os01g66920	Ser/Thr protein phosphatase family protein, putative, expressed
				LOC_Os01g66940	kinase, pfkB family, putative, expressed
				LOC_Os01g66950	expressed protein
				LOC_Os01g66960	selenoprotein precursor, putative, expressed
				LOC_Os01g66970	zinc finger, C3HC4 type domain containing protein, expressed
				LOC_Os01g66980	expressed protein
				LOC_Os01g66990	expressed protein
				LOC_Os01g67000	membrane-associated 30 kDa protein, chloroplast precursor, putative, expressed
				LOC_Os01g67010	expressed protein
				LOC_Os01g67030	auxin-responsive protein, putative, expressed
				LOC_Os01g67040	OsRhmbd5 - Putative Rhomboid homologue, expressed
				LOC_Os01g67054	calreticulin precursor protein, putative, expressed
				LOC_Os01g67070	expressed protein
				LOC_Os01g67080	expressed protein
				LOC_Os01g67090	IQ calmodulin-binding motif domain containing protein, expressed
				LOC_Os01g67100	expressed protein
				LOC_Os01g67110	expressed protein
				LOC_Os01g67120	rhodanese-like domain containing protein, putative, expressed
				LOC_Os01g67134	ribosomal L18p/L5e family protein, putative, expressed
				LOC_Os01g67150	expressed protein
				LOC_Os01g67160	cyclin-dependent kinase B1-1, putative, expressed
				LOC_Os01g67170	expressed protein
				LOC_Os01g67180	ribonuclease T2 family domain containing protein, expressed
				LOC_Os01g67190	ribonuclease T2 family domain containing protein, expressed
				LOC_Os01g67200	ribosomal protein L13 family protein, putative, expressed
				LOC_Os01g67210	PPR repeat domain containing protein, putative, expressed
				LOC_Os01g67220	Os1bglu4 - beta-glucosidase-like protein without signal sequence, expressed
				LOC_Os01g67240	formin-like protein 1 precursor, putative, expressed
				LOC_Os01g67250	Rad21 / Rec8 like protein, putative, expressed
				LOC_Os01g67260	expressed protein
				LOC_Os01g67270	expressed protein
				LOC_Os01g67280	expressed protein
				LOC_Os01g67290	cyclin-related protein, putative, expressed
				LOC_Os01g67300	expressed protein
				LOC_Os01g67310	patatin, putative, expressed
				LOC_Os01g67314	expressed protein
				LOC_Os01g67320	expressed protein
				LOC_Os01g67330	nucleotide-sugar transporter family protein, putative, expressed
				LOC_Os01g67340	STRUBBELIG-RECEPTOR FAMILY 8 precursor, putative, expressed
				LOC_Os01g67350	cysteine protease, putative, expressed
				LOC_Os01g67360	methyltransferase, putative, expressed
				LOC_Os01g67370	expressed protein
				LOC_Os01g67380	expressed protein
				LOC_Os01g67390	POEI32 - Pollen Ole e I allergen and extensin family protein precursor, expressed
				LOC_Os01g67400	hypothetical protein
				LOC_Os01g67410	AP2/EREBP transcription factor BABY BOOM, putative, expressed
				LOC_Os01g67420	lipase, putative, expressed
				LOC_Os01g67430	lipase, putative, expressed
				LOC_Os01g67450	lipase, putative, expressed
				LOC_Os01g67480	helix-loop-helix DNA-binding domain containing protein, expressed
				LOC_Os01g67490	OTU-like cysteine protease family protein, putative, expressed
				LOC_Os01g67500	armadillo/beta-catenin repeat family protein, putative, expressed
				LOC_Os01g67510	recA protein, putative, expressed
				LOC_Os01g67520	VTC2, putative, expressed
				LOC_Os01g67530	AMP-binding enzyme, putative, expressed
				LOC_Os01g67540	AMP-binding domain containing protein, expressed
				LOC_Os01g67550	FAD binding domain containing protein, expressed
				LOC_Os01g67560	Divergent PAP2 family domain containing protein, expressed
				LOC_Os01g67570	PDE312/PTAC10, putative, expressed
				LOC_Os01g67580	multidrug resistance-associated protein, putative, expressed
				LOC_Os01g67590	oligopeptidase, putative, expressed
				LOC_Os01g67600	CXE carboxylesterase, putative, expressed
				LOC_Os01g67610	hypothetical protein
				LOC_Os01g67620	expressed protein
				LOC_Os01g67630	peptide transporter PTR2, putative, expressed
				LOC_Os01g67640	PTR-like peptide transporter, putatuve, expressed
				LOC_Os01g67650	gibberellin response modulator protein, putative, expressed
				LOC_Os01g67660	expressed protein
				LOC_Os01g67670	gibberellin response modulator protein, putative, expressed
				LOC_Os01g67680	expressed protein
				LOC_Os01g67700	expressed protein
				LOC_Os01g67710	hypothetical protein
				LOC_Os01g67720	ABC1 family domain containing protein, putative, expressed
				LOC_Os01g67730	1-5-phosphoribosyl-5-5-phosphoribosylaminomethylideneaminoimidazole-4-carboxamide isomerase, chloroplast precursor, putative, expressed
				LOC_Os01g67740	chromosome segregation protein, putative, expressed
				LOC_Os01g67750	expressed protein
				LOC_Os01g67760	expressed protein
				LOC_Os01g67770	two-component response regulator, putative, expressed
				LOC_Os01g67790	F-box protein interaction domain containing protein, expressed
				LOC_Os01g67810	transposon protein, putative, unclassified, expressed
				LOC_Os01g67820	exo70 exocyst complex subunit domain containing protein, expressed
				LOC_Os01g67830	B3 DNA binding domain containing protein, expressed
				LOC_Os01g67835	ompA/MotB, putative, expressed
				LOC_Os01g67850	zinc finger, RING-type, putative, expressed
				LOC_Os01g67860	fructose-bisphospate aldolase isozyme, putative, expressed
				LOC_Os01g67870	expressed protein
				LOC_Os01g67880	vacuolar protein sorting-associated protein 53, putative, expressed
qDW8.007	8	799660	1710677	LOC_Os08g02270	hypothetical protein
				LOC_Os08g02280	hypothetical protein
				LOC_Os08g02290	expressed protein
				LOC_Os08g02300	no apical meristem protein, putative, expressed
				LOC_Os08g02320	expressed protein
				LOC_Os08g02330	RNA recognition motif containing protein, putative, expressed
				LOC_Os08g02340	60S acidic ribosomal protein, putative, expressed
				LOC_Os08g02350	expressed protein
				LOC_Os08g02354	expressed protein
				LOC_Os08g02360	exosome complex exonuclease, putative, expressed
				LOC_Os08g02370	galactosyltransferase family protein, putative, expressed
				LOC_Os08g02380	kinesin motor domain containing protein, putative, expressed
				LOC_Os08g02390	RNA recognition motif containing protein, putative, expressed
				LOC_Os08g02400	40S ribosomal protein S13, putative, expressed
				LOC_Os08g02410	40S ribosomal protein S13, putative, expressed
				LOC_Os08g02420	OsCML7 - Calmodulin-related calcium sensor protein, expressed
				LOC_Os08g02430	expressed protein
				LOC_Os08g02440	expressed protein
				LOC_Os08g02450	ATCHX, putative, expressed
				LOC_Os08g02460	expressed protein
				LOC_Os08g02490	AT hook motif domain containing protein, expressed
				LOC_Os08g02520	OsSAUR31 - Auxin-responsive SAUR gene family member, expressed
				LOC_Os08g02530	OsSAUR32 - Auxin-responsive SAUR gene family member, expressed
				LOC_Os08g02540	adenylate kinase, putative, expressed
				LOC_Os08g02550	proteasome subunit, putative, expressed
				LOC_Os08g02560	DUF1517 domain containing protein, putative, expressed
				LOC_Os08g02570	DUF1517 domain containing protein, putative, expressed
				LOC_Os08g02580	expressed protein
				LOC_Os08g02590	expressed protein
				LOC_Os08g02600	methyltransferase domain containing protein, expressed
				LOC_Os08g02610	expressed protein
				LOC_Os08g02630	photosystem II core complex proteins psbY, chloroplast precursor, putative, expressed
				LOC_Os08g02640	succinate dehydrogenase iron-sulfur subunit 2,mitochondrial precursor, putative, expressed
				LOC_Os08g02650	expressed protein
				LOC_Os08g02670	ATP binding protein, putative, expressed
				LOC_Os08g02680	expressed protein
				LOC_Os08g02690	MA3 domain containing protein, expressed
				LOC_Os08g02700	fructose-bisphospate aldolase isozyme, putative, expressed
				LOC_Os08g02710	plant protein of unknown function domain containing protein, expressed
				LOC_Os08g02720	expressed protein
				LOC_Os08g02730	plant protein of unknown function domain containing protein, expressed
				LOC_Os08g02740	expressed protein
				LOC_Os08g02750	expressed protein
				LOC_Os08g02800	ribosome, putative, expressed
				LOC_Os08g02810	hypothetical protein
				LOC_Os08g02820	plant protein of unknown function domain containing protein, expressed
				LOC_Os08g02840	ribosome, putative, expressed
				LOC_Os08g02850	zinc finger family protein, putative, expressed
				LOC_Os08g02860	transposon protein, putative, unclassified, expressed
				LOC_Os08g02870	expressed protein
				LOC_Os08g02880	CXXXC11 - Cysteine-rich protein with paired CXXXC motifs precursor, expressed
				LOC_Os08g02900	expressed protein
				LOC_Os08g02904	expressed protein
				LOC_Os08g02909	expressed protein
				LOC_Os08g02920	expressed protein
				LOC_Os08g02930	expressed protein
				LOC_Os08g02939	expressed protein
				LOC_Os08g02950	expressed protein
				LOC_Os08g02960	expressed protein
				LOC_Os08g02970	expressed protein
				LOC_Os08g02996	receptor-like kinase, putative, expressed
				LOC_Os08g03002	lectin-like receptor kinase 1, putative, expressed
				LOC_Os08g03020	lectin-like receptor kinase 1, putative, expressed
				LOC_Os08g03040	expressed protein
				LOC_Os08g03050	hypothetical protein
				LOC_Os08g03060	expressed protein
				LOC_Os08g03070	lectin-like receptor kinase 1, putative, expressed
				LOC_Os08g03090	lectin-like receptor kinase 1, putative, expressed
				LOC_Os08g03100	receptor like protein kinase, putative, expressed
				LOC_Os08g03150	receptor like protein kinase, putative, expressed
				LOC_Os08g03160	lectin-like receptor kinase 1, putative, expressed
				LOC_Os08g03170	lectin-like receptor kinase 1, putative, expressed
				LOC_Os08g03190	legume lectins beta domain containing protein, putative, expressed
				LOC_Os08g03210	retrotransposon protein, putative, unclassified, expressed
				LOC_Os08g03230	hypothetical protein
				LOC_Os08g03240	lectin-like receptor kinase 1, putative, expressed
				LOC_Os08g03260	zinc finger family protein, putative, expressed
				LOC_Os08g03270	zinc finger family protein, putative, expressed
				LOC_Os08g03280	expressed protein
				LOC_Os08g03290	glyceraldehyde-3-phosphate dehydrogenase, putative, expressed
				LOC_Os08g03300	OsFBDUF40 - F-box and DUF domain containing protein, expressed
				LOC_Os08g03310	zinc finger family protein, putative, expressed
				LOC_Os08g03320	OsFBDUF41 - F-box and DUF domain containing protein, expressed
				LOC_Os08g03330	expressed protein
				LOC_Os08g03350	amino acid transporter, putative, expressed
				LOC_Os08g03360	ATBET9, putative, expressed
				LOC_Os08g03370	Divergent PAP2 family domain containing protein, expressed
				LOC_Os08g03380	heat shock protein DnaJ, putative, expressed
				LOC_Os08g03390	pre-mRNA-splicing factor SLU7, putative, expressed
				LOC_Os08g03400	expressed protein
				LOC_Os08g03410	glutelin, putative, expressed
				LOC_Os08g03420	kelch repeat protein, putative, expressed
				LOC_Os08g03430	extracellular ligand-gated ion channel, putative, expressed
				LOC_Os08g03440	actin, putative, expressed
				LOC_Os08g03450	ribosomal protein L37, putative, expressed
				LOC_Os08g03470	MBTB15 - Bric-a-Brac, Tramtrack, Broad Complex BTB domain with Meprin and TRAF Homology MATH domain, expressed
				LOC_Os08g03480	MBTB16 - Bric-a-Brac, Tramtrack, Broad Complex BTB domain with Meprin and TRAF Homology MATH domain, expressed
				LOC_Os08g03490	ATBPM1, putative, expressed
				LOC_Os08g03500	MBTB17 - Bric-a-Brac, Tramtrack, Broad Complex BTB domain with Meprin and TRAF Homology MATH domain, expressed
				LOC_Os08g03510	MBTB18 - Bric-a-Brac, Tramtrack, Broad Complex BTB domain with Meprin and TRAF Homology MATH domain, expressed
				LOC_Os08g03520	retrotransposon protein, putative, Ty1-copia subclass, expressed
				LOC_Os08g03530	MBTB19 - Bric-a-Brac, Tramtrack, Broad Complex BTB domain with Meprin and TRAF Homology MATH domain, expressed
				LOC_Os08g03540	expressed protein
				LOC_Os08g03550	expressed protein
				LOC_Os08g03560	chloroplast unusual positioning protein, putative, expressed
				LOC_Os08g03570	NAD dependent epimerase/dehydratase family protein, putative, expressed
				LOC_Os08g03579	expressed protein
				LOC_Os08g03590	expressed protein
				LOC_Os08g03600	expressed protein
				LOC_Os08g03610	LSD1 zinc finger domain containing protein, expressed
qDW8.12	8	12384756	12458250	LOC_Os08g20630	expressed protein
				LOC_Os08g20636	expressed protein
				LOC_Os08g20644	expressed protein
				LOC_Os08g20660	sucrose-phosphate synthase, putative, expressed
				LOC_Os08g20680	expressed protein
				LOC_Os08g20690	retrotransposon protein, putative, unclassified, expressed
				LOC_Os08g20730	peroxidase precursor, putative, expressed
qDW8.27	8	27687657	28135748	LOC_Os08g43960	carrier, putative, expressed
				LOC_Os08g43970	carrier, putative, expressed
				LOC_Os08g43980	carrier, putative, expressed
				LOC_Os08g44000	uncharacterized protein ycf39, putative, expressed
				LOC_Os08g44010	WD domain, G-beta repeat domain containing protein, expressed
				LOC_Os08g44015	growth regulator related protein, putative, expressed
				LOC_Os08g44020	rhamnogalacturonate lyase, putative, expressed
				LOC_Os08g44030	hypothetical protein
				LOC_Os08g44040	rhamnogalacturonate lyase, putative, expressed
				LOC_Os08g44050	ZOS8-12 - C2H2 zinc finger protein, expressed
				LOC_Os08g44060	hypothetical protein
				LOC_Os08g44070	expressed protein
				LOC_Os08g44080	expressed protein
				LOC_Os08g44150	transmembrane 9 superfamily member, putative, expressed
				LOC_Os08g44160	expressed protein
				LOC_Os08g44180	expressed protein
				LOC_Os08g44190	ZOS8-13 - C2H2 zinc finger protein, expressed
				LOC_Os08g44200	ECT5, putative, expressed
				LOC_Os08g44210	dihydroneopterin aldolase, putative, expressed
				LOC_Os08g44220	GLTP domain containing protein, putative, expressed
				LOC_Os08g44230	zinc finger family protein, putative, expressed
				LOC_Os08g44240	AAA-type ATPase family protein, putative, expressed
				LOC_Os08g44250	fiber protein Fb14, putative, expressed
				LOC_Os08g44260	inositol or phosphatidylinositol phosphatase/ phosphoric monoester hydrolase, putative, expressed
				LOC_Os08g44270	vignain precursor, putative, expressed
				LOC_Os08g44280	protein-L-isoaspartate O-methyltransferase, putative, expressed
				LOC_Os08g44290	RNA recognition motif containing protein, putative, expressed
				LOC_Os08g44310	expressed protein
				LOC_Os08g44320	low molecular weight protein-tyrosine-phosphatase slr0328, putative, expressed
				LOC_Os08g44330	peptidylprolyl isomerase domain and WD repeat-containing protein 1, putative, expressed
				LOC_Os08g44340	monodehydroascorbate reductase, putative, expressed
				LOC_Os08g44350	histidine-containing phosphotransfer protein, putative, expressed
				LOC_Os08g44360	male sterility protein 2, putative, expressed
				LOC_Os08g44370	inosine-uridine preferring nucleoside hydrolase family protein, putative, expressed
				LOC_Os08g44380	L1P family of ribosomal proteins domain containing protein, expressed
				LOC_Os08g44390	EF hand family protein, putative, expressed
				LOC_Os08g44400	glutathione S-transferase, N-terminal domain containing protein, expressed
				LOC_Os08g44410	harpin-induced protein 1 domain containing protein, expressed
				LOC_Os08g44420	kinesin-related protein, putative, expressed
				LOC_Os08g44430	vesicle-associated membrane protein 727, putative, expressed
				LOC_Os08g44440	multiple myeloma tumor-associated protein 2, putative, expressed
				LOC_Os08g44450	L1P family of ribosomal proteins domain containing protein, expressed
				LOC_Os08g44460	expressed protein
				LOC_Os08g44470	expressed protein
				LOC_Os08g44480	40S ribosomal protein S25, putative, expressed
				LOC_Os08g44510	UDP-N-acetylglucosamine--peptide N-acetylglucosaminyltransferase SPINDLY, putative, expressed
				LOC_Os08g44520	peptidyl-prolyl cis-trans isomerase, putative, expressed
				LOC_Os08g44530	dihydroxy-acid dehydratase, putative, expressed
				LOC_Os08g44540	expressed protein
				LOC_Os08g44550	expressed protein
				LOC_Os08g44560	expressed protein
				LOC_Os08g44590	gibberellin 20 oxidase 2, putative, expressed
				LOC_Os08g44610	expressed protein
				LOC_Os08g44620	zinc-binding protein, putative, expressed
				LOC_Os08g44640	OsSCP41 - Putative Serine Carboxypeptidase homologue, expressed
				LOC_Os08g44650	expressed protein
				LOC_Os08g44660	EF hand family protein, putative, expressed
				LOC_Os08g44670	calreticulin precursor, putative, expressed
				LOC_Os08g44680	photosystem I reaction center subunit II, chloroplast precursor, putative, expressed
				LOC_Os08g44690	transposon protein, putative, Pong sub-class, expressed
				LOC_Os08g44730	hypothetical protein
				LOC_Os08g44740	expressed protein
				LOC_Os08g44750	auxin-induced protein 5NG4, putative, expressed
				LOC_Os08g44760	domain of unknown function DUF966 domain containing protein, expressed
				LOC_Os08g44770	copper/zinc superoxide dismutase, putative, expressed
qDW9.13	9	13908137	13983427	LOC_Os09g23410	expressed protein
				LOC_Os09g23420	expressed protein
				LOC_Os09g23430	hypothetical protein
				LOC_Os09g23440	hypothetical protein
				LOC_Os09g23450	expressed protein
				LOC_Os09g23460	expressed protein
				LOC_Os09g23480	transposon protein, putative, CACTA, En/Spm sub-class, expressed
				LOC_Os09g23500	hypothetical protein
				LOC_Os09g23510	hypothetical protein
				LOC_Os09g23520	expressed protein
qDW11.02	11	2360859	3182929	LOC_Os11g05350	expressed protein
				LOC_Os11g05360	RCLEA9 - Root cap and Late embryogenesis related family protein precursor, putative, expressed
				LOC_Os11g05370	60S ribosomal protein L26-1, putative, expressed
				LOC_Os11g05380	cytochrome P450, putative, expressed
				LOC_Os11g05390	transporter, major facilitator family, putative, expressed
				LOC_Os11g05394	nucampholin, putative, expressed
				LOC_Os11g05400	Ser/Thr protein phosphatase family protein, putative, expressed
				LOC_Os11g05410	Ser/Thr protein phosphatase family protein, putative, expressed
				LOC_Os11g05420	expressed protein
				LOC_Os11g05430	expressed protein
				LOC_Os11g05440	expressed protein
				LOC_Os11g05450	expressed protein
				LOC_Os11g05460	expressed protein
				LOC_Os11g05470	RCN1 Centroradialis-like1 homogous to TFL1 gene; contains Pfam profile PF01161: Phosphatidylethanolamine-binding protein, expressed
				LOC_Os11g05480	transcription factor, putative, expressed
				LOC_Os11g05490	expressed protein
				LOC_Os11g05494	expressed protein
				LOC_Os11g05500	conserved hypothetical protein
				LOC_Os11g05510	carbonic anhydrase family protein, putative, expressed
				LOC_Os11g05520	bifunctional monodehydroascorbate reductase and carbonic anhydrasenectarin-3 precursor, putative, expressed
				LOC_Os11g05530	expressed protein
				LOC_Os11g05540	rhoGAP domain containing protein, expressed
				LOC_Os11g05550	expressed protein
				LOC_Os11g05552	signal recognition particle 54 kDa protein, chloroplast precursor, putative, expressed
				LOC_Os11g05556	signal recognition particle 54 kDa protein, putative, expressed
				LOC_Os11g05562	40S ribosomal protein S25, putative, expressed
				LOC_Os11g05570	RNASEH2A - Putative ribonuclease H2 large subunit, expressed
				LOC_Os11g05580	expressed protein
				LOC_Os11g05590	expressed protein
				LOC_Os11g05600	DUF584 domain containing protein, putative, expressed
				LOC_Os11g05614	no apical meristem protein, putative, expressed
				LOC_Os11g05630	CBL-interacting protein kinase, putative, expressed
				LOC_Os11g05640	bZIP transcription factor domain containing protein, expressed
				LOC_Os11g05650	mRNA-decapping enzyme, putative, expressed
				LOC_Os11g05660	OsFBX396 - F-box domain containing protein, expressed
				LOC_Os11g05680	expressed protein
				LOC_Os11g05690	amino acid permease family protein, putative, expressed
				LOC_Os11g05700	ABC transporter family protein, putative, expressed
				LOC_Os11g05710	expressed protein
				LOC_Os11g05730	histone H3, putative, expressed
				LOC_Os11g05740	B3 DNA binding domain containing protein, expressed
				LOC_Os11g05750	expressed protein
				LOC_Os11g05760	OsProCP5 - Putative Lysosomal Pro-x Carboxypeptidase homologue, expressed
				LOC_Os11g05770	DUF623 domain containing protein, expressed
				LOC_Os11g05780	DUF623 domain containing protein, expressed
				LOC_Os11g05790	expressed protein
				LOC_Os11g05800	HVA22, putative, expressed
				LOC_Os11g05810	expressed protein
				LOC_Os11g05820	transposon protein, putative, Mutator sub-class, expressed
				LOC_Os11g05830	expressed protein
				LOC_Os11g05850	cyclin-T1-3, putative, expressed
				LOC_Os11g05860	harpin-induced protein 1 domain containing protein, expressed
				LOC_Os11g05870	harpin-induced protein 1 domain containing protein, expressed
				LOC_Os11g05880	exo70 exocyst complex subunit, putative, expressed
				LOC_Os11g05900	transposon protein, putative, CACTA, En/Spm sub-class, expressed
				LOC_Os11g05910	transposon protein, putative, CACTA, En/Spm sub-class
				LOC_Os11g05930	response regulator receiver domain containing protein, expressed
				LOC_Os11g05935	mucin, putative, expressed
				LOC_Os11g05940	expressed protein
				LOC_Os11g05950	expressed protein
				LOC_Os11g05960	expressed protein
				LOC_Os11g05970	pyridine nucleotide-disulphide oxidoreductase family protein, putative, expressed
				LOC_Os11g05980	tetratricopeptide-like helical, putative, expressed
				LOC_Os11g05990	digalactosyldiacylglycerol synthase, chloroplast precursor, putative, expressed
				LOC_Os11g06000	expressed protein
				LOC_Os11g06010	helix-loop-helix DNA-binding protein, putative, expressed
				LOC_Os11g06020	homeobox domain containing protein, expressed
				LOC_Os11g06030	expressed protein
				LOC_Os11g06040	PX domain containing protein, putative, expressed
				LOC_Os11g06050	expressed protein
				LOC_Os11g06070	expressed protein
				LOC_Os11g06090	expressed protein
				LOC_Os11g06100	carrier, putative, expressed
				LOC_Os11g06110	carrier, putative, expressed
				LOC_Os11g06130	PHD-finger family protein, expressed
				LOC_Os11g06140	serine/threonine-protein kinase WNK4, putative, expressed
				LOC_Os11g06150	basic proline-rich protein precursor, putative, expressed
				LOC_Os11g06170	bZIP transcriptional activator RSG, putative, expressed
				LOC_Os11g06180	nodulation-signaling pathway 2 protein, putative, expressed
				LOC_Os11g06190	expressed protein
				LOC_Os11g06200	expressed protein
				LOC_Os11g06210	expressed protein
				LOC_Os11g06220	expressed protein
				LOC_Os11g06230	expressed protein
				LOC_Os11g06234	expressed protein
				LOC_Os11g06240	ATOZI1, putative, expressed
				LOC_Os11g06250	hypothetical protein
				LOC_Os11g06290	expressed protein
				LOC_Os11g06300	expressed protein
				LOC_Os11g06310	integral membrane protein, putative, expressed
				LOC_Os11g06320	expressed protein
				LOC_Os11g06330	expressed protein
				LOC_Os11g06340	ubiquinol-cytochrome C reductase hinge protein, putative, expressed
				LOC_Os11g06350	expressed protein
				LOC_Os11g06360	hypothetical protein
				LOC_Os11g06370	expressed protein
				LOC_Os11g06390	actin, putative, expressed
				LOC_Os11g06410	homeodomain, putative, expressed
				LOC_Os11g06420	OsFBT13 - F-box and tubby domain containing protein, expressed
				LOC_Os11g06430	hypothetical protein
				LOC_Os11g06440	expressed protein
				LOC_Os11g06450	hypothetical protein
				LOC_Os11g06460	ribosome inactivating protein, expressed
				LOC_Os11g06480	expressed protein
				LOC_Os11g06490	ribosome inactivating protein, putative, expressed
				LOC_Os11g06520	thiamine pyrophosphate enzyme, N-terminal TPP binding domain containing protein, expressed
				LOC_Os11g06530	expressed protein
				LOC_Os11g06540	expressed protein
				LOC_Os11g06550	hypothetical protein
				LOC_Os11g06560	jasmonate-induced protein, putative
				LOC_Os11g06580	OsFBX397 - F-box domain containing protein, expressed
qDW12.27	12	27205921	27488377	LOC_Os12g43820	GCRP5 - Glycine and cysteine rich family protein precursor, expressed
				LOC_Os12g43830	NUC189 domain containing protein, expressed
				LOC_Os12g43840	ankyrin repeat domain-containing protein, putative, expressed
				LOC_Os12g43870	expressed protein
				LOC_Os12g43880	DNA binding protein, putative, expressed
				LOC_Os12g43890	GNS1/SUR4 membrane family protein, putative, expressed
				LOC_Os12g43900	retrotransposon protein, putative, LINE subclass, expressed
				LOC_Os12g43930	zinc finger, C3HC4 type domain containing protein, expressed
				LOC_Os12g43940	ankyrin repeat domain-containing protein, putative, expressed
				LOC_Os12g43950	homeobox domain containing protein, expressed
				LOC_Os12g43960	hypothetical protein
				LOC_Os12g43970	hydrolase, alpha/beta fold family domain containing protein, expressed
				LOC_Os12g43990	expressed protein
				LOC_Os12g44000	ubiquitin-conjugating enzyme E2 W, putative, expressed
				LOC_Os12g44010	purple acid phosphatase precursor, putative, expressed
				LOC_Os12g44020	Ser/Thr protein phosphatase family protein, putative, expressed
				LOC_Os12g44030	purple acid phosphatase precursor, putative, expressed
				LOC_Os12g44050	purple acid phosphatase precursor, putative, expressed
				LOC_Os12g44060	nodulin, putative, expressed
				LOC_Os12g44070	nodulin, putative, expressed
				LOC_Os12g44080	CHCH domain containing protein, expressed
				LOC_Os12g44090	leucine-rich repeat family protein, putative, expressed
				LOC_Os12g44100	peptide transporter PTR2, putative, expressed
				LOC_Os12g44110	ligA, putative, expressed
				LOC_Os12g44130	expressed protein
				LOC_Os12g44140	expressed protein
				LOC_Os12g44150	plasma membrane ATPase, putative, expressed
				LOC_Os12g44160	oxidoreductase, putative, expressed
				LOC_Os12g44170	pentatricopeptide, putative, expressed
				LOC_Os12g44180	nodulin, putative, expressed
				LOC_Os12g44190	ATPase 3, putative, expressed
				LOC_Os12g44210	ATPase, AAA family domain containing protein, expressed
				LOC_Os12g44220	ATPase 2, putative, expressed
				LOC_Os12g44230	expressed protein
				LOC_Os12g44240	N-acetylglucosaminyltransferase, putative, expressed
				LOC_Os12g44250	vesicle-associated membrane protein, putative, expressed
				LOC_Os12g44260	heat shock protein DnaJ, putative, expressed
				LOC_Os12g44270	glycine-rich protein, putative, expressed
				LOC_Os12g44280	subtilase, putative, expressed
				LOC_Os12g44290	cytochrome P450, putative, expressed
				LOC_Os12g44300	CHX28, putative, expressed
				LOC_Os12g44310	carotenoid cleavage dioxygenase, putative, expressed
				LOC_Os12g44320	carbohydrate binding protein, putative, expressed
				LOC_Os12g44330	serine/threonine-protein kinase PRP4, putative, expressed
qSNC1.21	1	21692903	21760129	LOC_Os01g38620	3-5 exonuclease/ nucleic acid binding protein, putative, expressed
				LOC_Os01g38640	expressed protein
				LOC_Os01g38650	expressed protein
				LOC_Os01g38660	expressed protein
				LOC_Os01g38670	transporter family protein, putative, expressed
				LOC_Os01g38680	transporter family protein, putative, expressed
				LOC_Os01g38690	nucleic acid binding protein, putative, expressed
				LOC_Os01g38700	nucleic acid binding protein, putative, expressed
				LOC_Os01g38710	nucleic acid binding protein, putative, expressed
				LOC_Os01g38720	nucleic acid binding protein, putative, expressed
				LOC_Os01g38750	expressed protein
				LOC_Os01g38760	nucleic acid binding protein, putative, expressed
qSNC2.22	2	22178643	22249726	LOC_Os02g36780	mTERF domain containing protein, expressed
				LOC_Os02g36810	cytokinin-O-glucosyltransferase 2, putative, expressed
				LOC_Os02g36820	expressed protein
				LOC_Os02g36830	cytokinin-O-glucosyltransferase 2, putative, expressed
				LOC_Os02g36840	cytokinin-O-glucosyltransferase 2, putative, expressed
				LOC_Os02g36845	membrane associated DUF588 domain containing protein, putative, expressed
				LOC_Os02g36850	oxygen evolving enhancer protein 3, identical, putative, expressed
				LOC_Os02g36860	expressed protein
				LOC_Os02g36870	YGL010w, putative, expressed
qSNC2.32	2	32743829	32915982	LOC_Os02g53530	ZOS2-17 - C2H2 zinc finger protein, expressed
				LOC_Os02g53570	DEFL74 - Defensin and Defensin-like DEFL family, expressed
				LOC_Os02g53580	expressed protein
				LOC_Os02g53590	DEFL71 - Defensin and Defensin-like DEFL family, expressed
				LOC_Os02g53600	DEFL75 - Defensin and Defensin-like DEFL family, expressed
				LOC_Os02g53620	nuclear transcription factor Y subunit, putative, expressed
				LOC_Os02g53660	expressed protein
				LOC_Os02g53670	MYB family transcription factor, putative, expressed
				LOC_Os02g53680	RPA1A - Putative single-stranded DNA binding complex subunit 1, expressed
				LOC_Os02g53690	growth regulating factor protein, putative, expressed
				LOC_Os02g53700	DENN domain containing protein, expressed
				LOC_Os02g53710	expressed protein
				LOC_Os02g53720	phytosulfokine receptor precursor, putative, expressed
				LOC_Os02g53730	expressed protein
				LOC_Os02g53740	XI-I, putative, expressed
qSNC3.15	3	15404332	15513823	LOC_Os03g26960	intron-binding protein aquarius, putative, expressed
				LOC_Os03g26970	peptidase, T1 family, putative, expressed
				LOC_Os03g26980	expressed protein
				LOC_Os03g26990	VQ domain containing protein, putative, expressed
				LOC_Os03g27003	expressed protein
				LOC_Os03g27010	expressed protein
				LOC_Os03g27019	expressed protein
				LOC_Os03g27030	RNA recognition motif containing protein, expressed
				LOC_Os03g27040	heavy metal-associated domain containing protein, expressed
				LOC_Os03g27050	expressed protein
				LOC_Os03g27054	expressed protein
				LOC_Os03g27060	expressed protein
				LOC_Os03g27070	expressed protein
				LOC_Os03g27080	calmodulin-binding transcription activator 2, putative, expressed
qSNC3.32	3	32028657	35497210	LOC_Os03g56234	myb/SANT domain protein, putative, expressed
				LOC_Os03g56241	40S ribosomal protein S29, putative, expressed
				LOC_Os03g56250	LRR receptor-like protein kinase, putative, expressed
				LOC_Os03g56260	kinesin motor domain containing protein, putative, expressed
				LOC_Os03g56270	receptor protein kinase CLAVATA1 precursor, putative, expressed
				LOC_Os03g56280	lactate/malate dehydrogenase, putative, expressed
				LOC_Os03g56290	expressed protein
				LOC_Os03g56300	4Fe-4S binding domain containing protein, expressed
				LOC_Os03g56310	5-nucleotidase domain-containing protein, putative, expressed
				LOC_Os03g56320	expressed protein
				LOC_Os03g56330	expressed protein
				LOC_Os03g56340	expressed protein
				LOC_Os03g56350	hypothetical protein
				LOC_Os03g56370	methyltransferase, putative, expressed
				LOC_Os03g56380	methyltransferase, putative, expressed
				LOC_Os03g56390	tRNA wybutosine-synthesizing protein 1, putative, expressed
				LOC_Os03g56400	pentatricopeptide, putative, expressed
				LOC_Os03g56410	expressed protein
				LOC_Os03g56420	expressed protein
				LOC_Os03g56430	expressed protein
				LOC_Os03g56440	OsFBX110 - F-box domain containing protein, expressed
				LOC_Os03g56450	OsFBX111 - F-box domain containing protein, expressed
				LOC_Os03g56460	glucose-6-phosphate isomerase, putative, expressed
				LOC_Os03g56470	protein kinase family protein, putative, expressed
				LOC_Os03g56480	expressed protein
				LOC_Os03g56490	DNA topoisomerase IV subunit A, putative, expressed
				LOC_Os03g56500	expressed protein
				LOC_Os03g56510	OsFBX112 - F-box domain containing protein, expressed
				LOC_Os03g56520	expressed protein
				LOC_Os03g56540	heat shock protein DnaJ, putative, expressed
				LOC_Os03g56560	retrotransposon protein, putative, unclassified, expressed
				LOC_Os03g56580	no apical meristem protein, putative, expressed
				LOC_Os03g56590	expressed protein
				LOC_Os03g56600	expressed protein
				LOC_Os03g56610	expressed protein
				LOC_Os03g56620	expressed protein
				LOC_Os03g56630	transposon protein, putative, unclassified, expressed
				LOC_Os03g56660	calmodulin binding protein, putative, expressed
				LOC_Os03g56670	photosystem I reaction center subunit III, chloroplast precursor, putative, expressed
				LOC_Os03g56682	DEFL40 - Defensin and Defensin-like DEFL family
				LOC_Os03g56690	expressed protein
				LOC_Os03g56700	expressed protein
				LOC_Os03g56710	expressed protein
				LOC_Os03g56714	expressed protein
				LOC_Os03g56720	hypothetical protein
				LOC_Os03g56724	expressed protein
				LOC_Os03g56730	expressed protein
				LOC_Os03g56740	expressed protein
				LOC_Os03g56750	expressed protein
				LOC_Os03g56760	expressed protein
				LOC_Os03g56770	expressed protein
				LOC_Os03g56780	expressed protein
				LOC_Os03g56781	expressed protein
				LOC_Os03g56782	expressed protein
				LOC_Os03g56784	expressed protein
				LOC_Os03g56790	actin-depolymerizing factor, putative, expressed
				LOC_Os03g56800	CBS domain containing membrane protein, putative, expressed
				LOC_Os03g56810	tubulin/FtsZ domain containing protein, putative, expressed
				LOC_Os03g56820	fatty acid hydroxylase, putative, expressed
				LOC_Os03g56830	ad-003, putative, expressed
				LOC_Os03g56840	GTP-binding protein, putative, expressed
				LOC_Os03g56850	pentatricopeptide, putative, expressed
				LOC_Os03g56860	expressed protein
				LOC_Os03g56869	ribose-5-phosphate isomerase A, putative, expressed
				LOC_Os03g56890	expressed protein
				LOC_Os03g56900	reticulon domain containing protein, putative, expressed
				LOC_Os03g56904	expressed protein
				LOC_Os03g56920	expressed protein
				LOC_Os03g56930	app1, putative, expressed
				LOC_Os03g56940	app1, putative, expressed
				LOC_Os03g56942	hypothetical protein
				LOC_Os03g56944	lysine-rich arabinogalactan protein 19 precursor, putative, expressed
				LOC_Os03g56950	phytochrome-interacting factor 4, putative, expressed
[truncated: 1,332 more rows]
