# Supplementary material for: Genetic Dissection of Alkalinity Tolerance at the Seedling Stage in Rice (Oryza sativa) Using a High-Resolution Linkage Map
Source: Plants (Basel). 2022 Dec 2;11(23):3347. doi: 10.3390/plants11233347 (PMC9738157; doi:10.3390/plants11233347)
Supplement: Supplementary file 1 [file plants-11-03347-s001.zip › Table S4.xlsx]

## Sheet: Table S5
Table S4: Polymorphic low, moderate, and high impact variants between Cocodrie and Dular for five selected alkalinity tolerance QTLs
QTL	Chromosome	Position	Cocodrie Allele	Dular Allele	Locus ID	Primary Variant Effect	Primary Variant Impact
qSNC3.32	Chr3	32028657	C	A	LOC_Os03g56220	missense_variant	MODERATE
qSNC3.32	Chr3	32035330	T	C	LOC_Os03g56234	missense_variant	MODERATE
qSNC3.32	Chr3	32035584	TGTCTAG	T	LOC_Os03g56234	splice_region_variant&intron_variant	LOW
qSNC3.32	Chr3	32035863	C	A	LOC_Os03g56234	missense_variant	MODERATE
qSNC3.32	Chr3	32035881	C	G	LOC_Os03g56234	missense_variant	MODERATE
qSNC3.32	Chr3	32036913	G	C	LOC_Os03g56234	missense_variant	MODERATE
qSNC3.32	Chr3	32044209	C	G	LOC_Os03g56250	missense_variant	MODERATE
qSNC3.32	Chr3	32044377	G	A	LOC_Os03g56250	missense_variant	MODERATE
qSNC3.32	Chr3	32047156	G	A	LOC_Os03g56250	missense_variant	MODERATE
qSNC3.32	Chr3	32047162	G	T	LOC_Os03g56250	missense_variant	MODERATE
qSNC3.32	Chr3	32047255	G	A	LOC_Os03g56250	missense_variant	MODERATE
qSNC3.32	Chr3	32047261	C	T	LOC_Os03g56250	missense_variant	MODERATE
qSNC3.32	Chr3	32047832	T	C	LOC_Os03g56250	missense_variant	MODERATE
qSNC3.32	Chr3	32070431	T	G	LOC_Os03g56260	missense_variant	MODERATE
qSNC3.32	Chr3	32080846	G	A	LOC_Os03g56270	missense_variant	MODERATE
qSNC3.32	Chr3	32081109	C	T	LOC_Os03g56270	splice_donor_variant&intron_variant	HIGH
qSNC3.32	Chr3	32091365	CGG	C	LOC_Os03g56290	frameshift_variant	HIGH
qSNC3.32	Chr3	32102826	G	A	LOC_Os03g56310	missense_variant	MODERATE
qSNC3.32	Chr3	32108708	A	C	LOC_Os03g56320	missense_variant	MODERATE
qSNC3.32	Chr3	32113512	A	G	LOC_Os03g56330	missense_variant	MODERATE
qSNC3.32	Chr3	32114109	A	C	LOC_Os03g56340	stop_lost&splice_region_variant	HIGH
qSNC3.32	Chr3	32114505	C	T	LOC_Os03g56340	missense_variant	MODERATE
qSNC3.32	Chr3	32114548	T	A	LOC_Os03g56340	missense_variant	MODERATE
qSNC3.32	Chr3	32114994	T	C	LOC_Os03g56340	missense_variant	MODERATE
qSNC3.32	Chr3	32115114	C	T	LOC_Os03g56340	missense_variant	MODERATE
qSNC3.32	Chr3	32118925	G	A	LOC_Os03g56350	missense_variant	MODERATE
qSNC3.32	Chr3	32118952	C	A	LOC_Os03g56350	missense_variant	MODERATE
qSNC3.32	Chr3	32118958	G	T	LOC_Os03g56350	missense_variant	MODERATE
qSNC3.32	Chr3	32137590	C	T	LOC_Os03g56370	splice_region_variant&synonymous_variant	LOW
qSNC3.32	Chr3	32142503	G	A	LOC_Os03g56380	missense_variant	MODERATE
qSNC3.32	Chr3	32151972	T	C	LOC_Os03g56400	missense_variant	MODERATE
qSNC3.32	Chr3	32152707	G	C	LOC_Os03g56400	missense_variant	MODERATE
qSNC3.32	Chr3	32152720	A	C	LOC_Os03g56400	missense_variant	MODERATE
qSNC3.32	Chr3	32154364	T	C	LOC_Os03g56410	missense_variant	MODERATE
qSNC3.32	Chr3	32155060	C	A	LOC_Os03g56410	missense_variant	MODERATE
qSNC3.32	Chr3	32165876	T	C	LOC_Os03g56430	missense_variant	MODERATE
qSNC3.32	Chr3	32166265	T	G	LOC_Os03g56430	missense_variant	MODERATE
qSNC3.32	Chr3	32167134	G	T	LOC_Os03g56430	missense_variant	MODERATE
qSNC3.32	Chr3	32168244	T	A	LOC_Os03g56430	missense_variant	MODERATE
qSNC3.32	Chr3	32169191	A	G	LOC_Os03g56440	stop_lost&splice_region_variant	HIGH
qSNC3.32	Chr3	32169661	A	G	LOC_Os03g56440	missense_variant	MODERATE
qSNC3.32	Chr3	32170049	T	C	LOC_Os03g56440	missense_variant	MODERATE
qSNC3.32	Chr3	32170567	A	C	LOC_Os03g56450	missense_variant	MODERATE
qSNC3.32	Chr3	32170647	G	A	LOC_Os03g56450	missense_variant	MODERATE
qSNC3.32	Chr3	32170885	C	T	LOC_Os03g56450	missense_variant	MODERATE
qSNC3.32	Chr3	32171446	A	G	LOC_Os03g56450	missense_variant	MODERATE
qSNC3.32	Chr3	32171924	GT	G	LOC_Os03g56450	frameshift_variant&stop_lost&splice_region_variant	HIGH
qSNC3.32	Chr3	32183062	T	C	LOC_Os03g56470	missense_variant	MODERATE
qSNC3.32	Chr3	32184988	A	C	LOC_Os03g56470	missense_variant	MODERATE
qSNC3.32	Chr3	32187533	T	A	LOC_Os03g56480	missense_variant	MODERATE
qSNC3.32	Chr3	32187760	CGCTGCTGCTGCTGCT	C	LOC_Os03g56480	disruptive_inframe_deletion	MODERATE
qSNC3.32	Chr3	32187884	G	T	LOC_Os03g56480	missense_variant	MODERATE
qSNC3.32	Chr3	32188214	C	T	LOC_Os03g56480	missense_variant	MODERATE
qSNC3.32	Chr3	32188338	C	T	LOC_Os03g56480	missense_variant	MODERATE
qSNC3.32	Chr3	32188358	G	A	LOC_Os03g56480	missense_variant	MODERATE
qSNC3.32	Chr3	32189016	C	G	LOC_Os03g56480	missense_variant	MODERATE
qSNC3.32	Chr3	32190425	C	G	LOC_Os03g56490	missense_variant	MODERATE
qSNC3.32	Chr3	32190574	T	A	LOC_Os03g56490	missense_variant	MODERATE
qSNC3.32	Chr3	32191179	T	G	LOC_Os03g56490	missense_variant	MODERATE
qSNC3.32	Chr3	32191206	A	G	LOC_Os03g56490	missense_variant	MODERATE
qSNC3.32	Chr3	32194805	C	T	LOC_Os03g56500	missense_variant	MODERATE
qSNC3.32	Chr3	32194922	A	C	LOC_Os03g56500	missense_variant	MODERATE
qSNC3.32	Chr3	32200763	C	A	LOC_Os03g56520	missense_variant	MODERATE
qSNC3.32	Chr3	32209135	GCCTCCT	G	LOC_Os03g56540	splice_region_variant&intron_variant	LOW
qSNC3.32	Chr3	32220387	G	A	LOC_Os03g56560	start_lost	HIGH
qSNC3.32	Chr3	32220979	A	G	LOC_Os03g56560	missense_variant	MODERATE
qSNC3.32	Chr3	32220988	G	A	LOC_Os03g56560	missense_variant	MODERATE
qSNC3.32	Chr3	32222952	T	C	LOC_Os03g56560	missense_variant	MODERATE
qSNC3.32	Chr3	32223011	G	A	LOC_Os03g56560	missense_variant	MODERATE
qSNC3.32	Chr3	32223028	G	C	LOC_Os03g56560	missense_variant	MODERATE
qSNC3.32	Chr3	32223038	A	G	LOC_Os03g56560	missense_variant	MODERATE
qSNC3.32	Chr3	32238423	C	G	LOC_Os03g56590	missense_variant	MODERATE
qSNC3.32	Chr3	32242556	T	C	LOC_Os03g56600	missense_variant	MODERATE
qSNC3.32	Chr3	32242771	G	T	LOC_Os03g56600	stop_gained	HIGH
qSNC3.32	Chr3	32243087	T	TC	LOC_Os03g56600	frameshift_variant	HIGH
qSNC3.32	Chr3	32248967	G	T	LOC_Os03g56620	missense_variant	MODERATE
qSNC3.32	Chr3	32249173	G	C	LOC_Os03g56620	missense_variant	MODERATE
qSNC3.32	Chr3	32251427	A	G	LOC_Os03g56620	missense_variant	MODERATE
qSNC3.32	Chr3	32252566	G	A	LOC_Os03g56630	missense_variant	MODERATE
qSNC3.32	Chr3	32253002	C	A	LOC_Os03g56630	missense_variant	MODERATE
qSNC3.32	Chr3	32253900	G	A	LOC_Os03g56630	missense_variant	MODERATE
qSNC3.32	Chr3	32254125	A	C	LOC_Os03g56630	missense_variant	MODERATE
qSNC3.32	Chr3	32254933	C	A	LOC_Os03g56630	missense_variant	MODERATE
qSNC3.32	Chr3	32267968	G	A	LOC_Os03g56660	missense_variant	MODERATE
qSNC3.32	Chr3	32267969	C	A	LOC_Os03g56660	missense_variant	MODERATE
qSNC3.32	Chr3	32267984	G	A	LOC_Os03g56660	missense_variant	MODERATE
qSNC3.32	Chr3	32268035	C	T	LOC_Os03g56660	missense_variant	MODERATE
qSNC3.32	Chr3	32288776	A	T	LOC_Os03g56682	missense_variant	MODERATE
qSNC3.32	Chr3	32288803	A	G	LOC_Os03g56682	missense_variant	MODERATE
qSNC3.32	Chr3	32292005	G	A	LOC_Os03g56690	missense_variant	MODERATE
qSNC3.32	Chr3	32292074	A	G	LOC_Os03g56690	missense_variant&splice_region_variant	MODERATE
qSNC3.32	Chr3	32292431	G	A	LOC_Os03g56690	missense_variant	MODERATE
qSNC3.32	Chr3	32292587	C	T	LOC_Os03g56690	missense_variant	MODERATE
qSNC3.32	Chr3	32292658	A	C	LOC_Os03g56690	missense_variant	MODERATE
qSNC3.32	Chr3	32313521	A	G	LOC_Os03g56710	missense_variant	MODERATE
qSNC3.32	Chr3	32313593	A	G	LOC_Os03g56710	missense_variant	MODERATE
qSNC3.32	Chr3	32313594	C	T	LOC_Os03g56710	missense_variant	MODERATE
qSNC3.32	Chr3	32338890	T	G	LOC_Os03g56760	missense_variant	MODERATE
qSNC3.32	Chr3	32339248	G	A	LOC_Os03g56760	missense_variant	MODERATE
qSNC3.32	Chr3	32339280	G	T	LOC_Os03g56760	missense_variant	MODERATE
qSNC3.32	Chr3	32339288	ACATGTGGAACT	A	LOC_Os03g56760	frameshift_variant	HIGH
qSNC3.32	Chr3	32339443	CG	C	LOC_Os03g56760	frameshift_variant	HIGH
qSNC3.32	Chr3	32342105	C	CT	LOC_Os03g56770	frameshift_variant&splice_region_variant	HIGH
qSNC3.32	Chr3	32342134	C	T	LOC_Os03g56770	missense_variant	MODERATE
qSNC3.32	Chr3	32342309	C	T	LOC_Os03g56770	missense_variant	MODERATE
qSNC3.32	Chr3	32342574	C	G	LOC_Os03g56770	missense_variant	MODERATE
qSNC3.32	Chr3	32343059	T	C	LOC_Os03g56770	start_lost	HIGH
qSNC3.32	Chr3	32344100	G	T	LOC_Os03g56780	missense_variant	MODERATE
qSNC3.32	Chr3	32347412	CCGCACTCGCCGGCGT	C	LOC_Os03g56781	disruptive_inframe_deletion	MODERATE
qSNC3.32	Chr3	32347508	G	C	LOC_Os03g56781	missense_variant	MODERATE
qSNC3.32	Chr3	32348072	T	G	LOC_Os03g56781	missense_variant	MODERATE
qSNC3.32	Chr3	32348102	G	T	LOC_Os03g56781	missense_variant	MODERATE
qSNC3.32	Chr3	32359748	A	C	LOC_Os03g56784	missense_variant	MODERATE
qSNC3.32	Chr3	32365867	G	A	LOC_Os03g56800	missense_variant	MODERATE
qSNC3.32	Chr3	32366443	A	G	LOC_Os03g56800	missense_variant	MODERATE
qSNC3.32	Chr3	32369886	A	G	LOC_Os03g56800	missense_variant	MODERATE
qSNC3.32	Chr3	32374389	G	GGAA	LOC_Os03g56810	disruptive_inframe_insertion	MODERATE
qSNC3.32	Chr3	32377840	T	C	LOC_Os03g56820	missense_variant	MODERATE
qSNC3.32	Chr3	32380753	ACCAAGGTCTC	A	LOC_Os03g56830	frameshift_variant	HIGH
qSNC3.32	Chr3	32380777	T	A	LOC_Os03g56830	missense_variant	MODERATE
qSNC3.32	Chr3	32382709	T	C	LOC_Os03g56830	missense_variant	MODERATE
qSNC3.32	Chr3	32383554	C	G	LOC_Os03g56830	missense_variant	MODERATE
qSNC3.32	Chr3	32389083	T	A	LOC_Os03g56850	missense_variant	MODERATE
qSNC3.32	Chr3	32389111	G	T	LOC_Os03g56850	missense_variant	MODERATE
qSNC3.32	Chr3	32389451	G	A	LOC_Os03g56850	missense_variant	MODERATE
qSNC3.32	Chr3	32390217	T	G	LOC_Os03g56850	missense_variant	MODERATE
qSNC3.32	Chr3	32391533	A	C	LOC_Os03g56850	missense_variant	MODERATE
qSNC3.32	Chr3	32395384	T	A	LOC_Os03g56869	missense_variant	MODERATE
qSNC3.32	Chr3	32395620	A	T	LOC_Os03g56869	splice_region_variant&synonymous_variant	LOW
qSNC3.32	Chr3	32396139	G	T	LOC_Os03g56869	splice_region_variant&intron_variant	LOW
qSNC3.32	Chr3	32396590	A	T	LOC_Os03g56869	missense_variant	MODERATE
qSNC3.32	Chr3	32396888	GAGGCC	G	LOC_Os03g56869	splice_region_variant&intron_variant	LOW
qSNC3.32	Chr3	32403139	AACACATCAGCAGCTACAAGCACAGACAGAGCATCACACATGGCT	A	LOC_Os03g56900	frameshift_variant&start_lost	HIGH
qSNC3.32	Chr3	32403437	A	G	LOC_Os03g56900	missense_variant	MODERATE
qSNC3.32	Chr3	32408015	C	T	LOC_Os03g56904	missense_variant	MODERATE
qSNC3.32	Chr3	32408029	A	G	LOC_Os03g56904	stop_lost&splice_region_variant	HIGH
qSNC3.32	Chr3	32418791	G	C	LOC_Os03g56920	missense_variant	MODERATE
qSNC3.32	Chr3	32418809	G	A	LOC_Os03g56920	missense_variant	MODERATE
qSNC3.32	Chr3	32418813	T	C	LOC_Os03g56920	missense_variant	MODERATE
qSNC3.32	Chr3	32418909	T	C	LOC_Os03g56920	missense_variant	MODERATE
qSNC3.32	Chr3	32418963	A	G	LOC_Os03g56920	splice_region_variant&intron_variant	LOW
qSNC3.32	Chr3	32419088	G	A	LOC_Os03g56920	missense_variant	MODERATE
qSNC3.32	Chr3	32419149	C	A	LOC_Os03g56920	missense_variant	MODERATE
qSNC3.32	Chr3	32419161	A	G	LOC_Os03g56920	missense_variant	MODERATE
qSNC3.32	Chr3	32419281	T	G	LOC_Os03g56920	missense_variant	MODERATE
qSNC3.32	Chr3	32419399	G	GTCT	LOC_Os03g56920	disruptive_inframe_insertion	MODERATE
qSNC3.32	Chr3	32419420	T	A	LOC_Os03g56920	missense_variant	MODERATE
qSNC3.32	Chr3	32419437	C	T	LOC_Os03g56920	missense_variant	MODERATE
qSNC3.32	Chr3	32419478	C	T	LOC_Os03g56920	missense_variant	MODERATE
qSNC3.32	Chr3	32419484	T	C	LOC_Os03g56920	missense_variant	MODERATE
qSNC3.32	Chr3	32419536	A	C	LOC_Os03g56920	missense_variant	MODERATE
qSNC3.32	Chr3	32419541	C	A	LOC_Os03g56920	missense_variant	MODERATE
qSNC3.32	Chr3	32419575	G	T	LOC_Os03g56920	missense_variant	MODERATE
qSNC3.32	Chr3	32419598	T	G	LOC_Os03g56920	missense_variant	MODERATE
qSNC3.32	Chr3	32419601	A	G	LOC_Os03g56920	missense_variant	MODERATE
qSNC3.32	Chr3	32419658	T	C	LOC_Os03g56920	missense_variant	MODERATE
qSNC3.32	Chr3	32419733	G	T	LOC_Os03g56920	missense_variant	MODERATE
qSNC3.32	Chr3	32419794	A	G	LOC_Os03g56920	missense_variant	MODERATE
qSNC3.32	Chr3	32419815	C	T	LOC_Os03g56920	missense_variant	MODERATE
qSNC3.32	Chr3	32419979	C	T	LOC_Os03g56920	missense_variant	MODERATE
qSNC3.32	Chr3	32419984	GT	G	LOC_Os03g56920	frameshift_variant	HIGH
qSNC3.32	Chr3	32420081	G	A	LOC_Os03g56920	missense_variant	MODERATE
qSNC3.32	Chr3	32423591	CCCACCATCCCGGCCATCCCGACGATCCCCGGCGTGCCGGCGGTCGGCCCCACCATCCCGACCATCCCGACCATCCCGACGATCCCCGGCGTGCCGGCGGTCGGTT	C	LOC_Os03g56930	disruptive_inframe_deletion	MODERATE
qSNC3.32	Chr3	32425743	C	T	LOC_Os03g56940	missense_variant	MODERATE
qSNC3.32	Chr3	32427040	C	T	LOC_Os03g56942	missense_variant	MODERATE
qSNC3.32	Chr3	32427043	A	ATC	LOC_Os03g56942	frameshift_variant	HIGH
qSNC3.32	Chr3	32427118	C	T	LOC_Os03g56942	missense_variant	MODERATE
qSNC3.32	Chr3	32427310	T	C	LOC_Os03g56942	missense_variant	MODERATE
qSNC3.32	Chr3	32427329	T	C	LOC_Os03g56942	missense_variant	MODERATE
qSNC3.32	Chr3	32427343	C	A	LOC_Os03g56942	missense_variant	MODERATE
qSNC3.32	Chr3	32427344	C	T	LOC_Os03g56942	missense_variant	MODERATE
qSNC3.32	Chr3	32427361	G	GC	LOC_Os03g56942	frameshift_variant	HIGH
qSNC3.32	Chr3	32433274	G	C	LOC_Os03g56950	5_prime_UTR_premature_start_codon_gain_variant	LOW
qSNC3.32	Chr3	32434744	G	T	LOC_Os03g56950	missense_variant	MODERATE
qSNC3.32	Chr3	32435017	T	C	LOC_Os03g56950	missense_variant	MODERATE
qSNC3.32	Chr3	32442098	C	T	LOC_Os03g56960	missense_variant	MODERATE
qSNC3.32	Chr3	32448641	G	A	LOC_Os03g56970	missense_variant	MODERATE
qSNC3.32	Chr3	32457604	A	G	LOC_Os03g56974	missense_variant	MODERATE
qSNC3.32	Chr3	32457638	G	A	LOC_Os03g56974	missense_variant	MODERATE
qSNC3.32	Chr3	32470548	A	G	LOC_Os03g57000	missense_variant	MODERATE
qSNC3.32	Chr3	32474033	A	G	LOC_Os03g57010	missense_variant	MODERATE
qSNC3.32	Chr3	32485176	C	T	LOC_Os03g57020	missense_variant	MODERATE
qSNC3.32	Chr3	32485203	T	C	LOC_Os03g57020	missense_variant	MODERATE
qSNC3.32	Chr3	32510494	T	C	LOC_Os03g57030	missense_variant	MODERATE
qSNC3.32	Chr3	32510516	T	C	LOC_Os03g57030	missense_variant	MODERATE
qSNC3.32	Chr3	32510551	G	A	LOC_Os03g57030	missense_variant	MODERATE
qSNC3.32	Chr3	32524077	C	CT	LOC_Os03g57050	frameshift_variant	HIGH
qSNC3.32	Chr3	32526488	G	T	LOC_Os03g57060	missense_variant	MODERATE
qSNC3.32	Chr3	32532358	C	T	LOC_Os03g57070	missense_variant	MODERATE
qSNC3.32	Chr3	32532680	T	G	LOC_Os03g57070	5_prime_UTR_premature_start_codon_gain_variant	LOW
qSNC3.32	Chr3	32540811	T	TA	LOC_Os03g57080	splice_region_variant	LOW
qSNC3.32	Chr3	32556715	G	T	LOC_Os03g57100	splice_region_variant&intron_variant	LOW
qSNC3.32	Chr3	32561154	T	C	LOC_Os03g57110	missense_variant	MODERATE
qSNC3.32	Chr3	32562818	T	C	LOC_Os03g57110	missense_variant	MODERATE
qSNC3.32	Chr3	32563348	A	G	LOC_Os03g57110	missense_variant	MODERATE
qSNC3.32	Chr3	32563931	C	T	LOC_Os03g57110	missense_variant	MODERATE
qSNC3.32	Chr3	32563940	C	A	LOC_Os03g57110	missense_variant	MODERATE
qSNC3.32	Chr3	32565031	G	A	LOC_Os03g57110	5_prime_UTR_premature_start_codon_gain_variant	LOW
qSNC3.32	Chr3	32566980	A	G	LOC_Os03g57120	splice_region_variant&intron_variant	LOW
qSNC3.32	Chr3	32567909	G	A	LOC_Os03g57120	missense_variant	MODERATE
qSNC3.32	Chr3	32568658	T	C	LOC_Os03g57120	missense_variant	MODERATE
qSNC3.32	Chr3	32587607	C	T	LOC_Os03g57145	missense_variant	MODERATE
qSNC3.32	Chr3	32587869	C	A	LOC_Os03g57145	missense_variant	MODERATE
qSNC3.32	Chr3	32593832	C	T	LOC_Os03g57160	missense_variant	MODERATE
qSNC3.32	Chr3	32600174	G	A	LOC_Os03g57170	missense_variant	MODERATE
qSNC3.32	Chr3	32601011	A	G	LOC_Os03g57170	missense_variant	MODERATE
qSNC3.32	Chr3	32603741	CA	C	LOC_Os03g57180	frameshift_variant	HIGH
qSNC3.32	Chr3	32614762	A	ACGC	LOC_Os03g57190	disruptive_inframe_insertion	MODERATE
qSNC3.32	Chr3	32615145	T	C	LOC_Os03g57190	missense_variant	MODERATE
qSNC3.32	Chr3	32619533	A	G	LOC_Os03g57200	missense_variant	MODERATE
qSNC3.32	Chr3	32620288	C	T	LOC_Os03g57200	5_prime_UTR_premature_start_codon_gain_variant	LOW
qSNC3.32	Chr3	32630854	A	T	LOC_Os03g57220	splice_region_variant&intron_variant	LOW
qSNC3.32	Chr3	32631431	A	C	LOC_Os03g57220	splice_region_variant&intron_variant	LOW
qSNC3.32	Chr3	32633669	A	G	LOC_Os03g57230	splice_region_variant&intron_variant	LOW
qSNC3.32	Chr3	32656699	A	G	LOC_Os03g57260	missense_variant	MODERATE
qSNC3.32	Chr3	32657973	C	T	LOC_Os03g57260	missense_variant	MODERATE
qSNC3.32	Chr3	32657975	C	G	LOC_Os03g57260	missense_variant	MODERATE
qSNC3.32	Chr3	32660215	A	T	LOC_Os03g57260	missense_variant	MODERATE
qSNC3.32	Chr3	32662853	A	C	LOC_Os03g57270	missense_variant	MODERATE
qSNC3.32	Chr3	32663073	ATCC	A	LOC_Os03g57270	disruptive_inframe_deletion	MODERATE
qSNC3.32	Chr3	32663440	A	C	LOC_Os03g57270	missense_variant	MODERATE
qSNC3.32	Chr3	32668133	A	G	LOC_Os03g57280	splice_region_variant&intron_variant	LOW
qSNC3.32	Chr3	32674721	G	A	LOC_Os03g57290	missense_variant	MODERATE
qSNC3.32	Chr3	32674916	T	G	LOC_Os03g57290	splice_region_variant&intron_variant	LOW
qSNC3.32	Chr3	32681425	C	T	LOC_Os03g57300	missense_variant	MODERATE
qSNC3.32	Chr3	32682950	C	A	LOC_Os03g57300	missense_variant	MODERATE
qSNC3.32	Chr3	32686215	T	C	LOC_Os03g57300	missense_variant	MODERATE
qSNC3.32	Chr3	32690035	A	T	LOC_Os03g57300	missense_variant	MODERATE
qSNC3.32	Chr3	32695826	T	C	LOC_Os03g57310	missense_variant	MODERATE
qSNC3.32	Chr3	32696797	G	T	LOC_Os03g57320	missense_variant	MODERATE
qSNC3.32	Chr3	32696984	T	C	LOC_Os03g57320	missense_variant	MODERATE
qSNC3.32	Chr3	32698471	A	G	LOC_Os03g57320	missense_variant	MODERATE
qSNC3.32	Chr3	32701410	T	A	LOC_Os03g57330	missense_variant	MODERATE
qSNC3.32	Chr3	32701533	C	T	LOC_Os03g57330	missense_variant	MODERATE
qSNC3.32	Chr3	32704043	G	A	LOC_Os03g57330	splice_region_variant&intron_variant	LOW
qSNC3.32	Chr3	32711115	T	TA	LOC_Os03g57340	stop_retained_variant	MODIFIER
qSNC3.32	Chr3	32718175	C	T	LOC_Os03g57360	missense_variant	MODERATE
qSNC3.32	Chr3	32718346	C	A	LOC_Os03g57360	missense_variant	MODERATE
qSNC3.32	Chr3	32718806	T	C	LOC_Os03g57360	splice_region_variant&synonymous_variant	LOW
qSNC3.32	Chr3	32718861	A	C	LOC_Os03g57360	start_lost	HIGH
qSNC3.32	Chr3	32726803	C	.	LOC_Os03g57380	missense_variant	MODERATE
qSNC3.32	Chr3	32727324	C	T	LOC_Os03g57380	missense_variant	MODERATE
qSNC3.32	Chr3	32727633	G	A	LOC_Os03g57380	stop_gained	HIGH
qSNC3.32	Chr3	32727672	CA	C	LOC_Os03g57380	frameshift_variant	HIGH
qSNC3.32	Chr3	32728593	GA	G	LOC_Os03g57380	frameshift_variant	HIGH
qSNC3.32	Chr3	32731452	T	G	LOC_Os03g57390	missense_variant	MODERATE
qSNC3.32	Chr3	32731631	G	GC	LOC_Os03g57390	frameshift_variant	HIGH
qSNC3.32	Chr3	32731632	ATG	A	LOC_Os03g57390	frameshift_variant	HIGH
qSNC3.32	Chr3	32731643	G	A	LOC_Os03g57390	missense_variant	MODERATE
qSNC3.32	Chr3	32731665	T	C	LOC_Os03g57390	missense_variant	MODERATE
qSNC3.32	Chr3	32731671	T	C	LOC_Os03g57390	missense_variant	MODERATE
qSNC3.32	Chr3	32731680	C	T	LOC_Os03g57390	missense_variant	MODERATE
qSNC3.32	Chr3	32731684	G	C	LOC_Os03g57390	missense_variant	MODERATE
qSNC3.32	Chr3	32731685	C	G	LOC_Os03g57390	missense_variant	MODERATE
qSNC3.32	Chr3	32732242	C	T	LOC_Os03g57400	missense_variant	MODERATE
qSNC3.32	Chr3	32736888	C	A	LOC_Os03g57410	missense_variant	MODERATE
qSNC3.32	Chr3	32747691	C	A	LOC_Os03g57430	missense_variant	MODERATE
qSNC3.32	Chr3	32748008	T	G	LOC_Os03g57430	missense_variant	MODERATE
qSNC3.32	Chr3	32749008	C	T	LOC_Os03g57430	missense_variant	MODERATE
qSNC3.32	Chr3	32749746	C	T	LOC_Os03g57430	missense_variant	MODERATE
qSNC3.32	Chr3	32750114	G	T	LOC_Os03g57430	missense_variant	MODERATE
qSNC3.32	Chr3	32750327	G	GCAGCAC	LOC_Os03g57430	disruptive_inframe_insertion	MODERATE
qSNC3.32	Chr3	32755177	T	TAA	LOC_Os03g57450	splice_region_variant&intron_variant	LOW
qSNC3.32	Chr3	32759867	C	T	LOC_Os03g57460	missense_variant	MODERATE
qSNC3.32	Chr3	32760339	C	CAAG	LOC_Os03g57460	disruptive_inframe_insertion	MODERATE
qSNC3.32	Chr3	32781335	G	A	LOC_Os03g57490	missense_variant	MODERATE
qSNC3.32	Chr3	32781717	A	G	LOC_Os03g57490	missense_variant	MODERATE
qSNC3.32	Chr3	32782120	A	C	LOC_Os03g57490	missense_variant	MODERATE
qSNC3.32	Chr3	32782121	T	A	LOC_Os03g57490	missense_variant	MODERATE
qSNC3.32	Chr3	32782329	C	G	LOC_Os03g57490	missense_variant	MODERATE
qSNC3.32	Chr3	32782338	C	T	LOC_Os03g57490	missense_variant	MODERATE
qSNC3.32	Chr3	32782451	G	A	LOC_Os03g57490	missense_variant	MODERATE
qSNC3.32	Chr3	32782493	TCG	T	LOC_Os03g57490	frameshift_variant	HIGH
qSNC3.32	Chr3	32782496	A	AAT	LOC_Os03g57490	frameshift_variant	HIGH
qSNC3.32	Chr3	32782515	G	A	LOC_Os03g57490	missense_variant	MODERATE
qSNC3.32	Chr3	32782532	A	T	LOC_Os03g57490	missense_variant	MODERATE
qSNC3.32	Chr3	32782557	G	A	LOC_Os03g57490	missense_variant	MODERATE
qSNC3.32	Chr3	32782704	T	A	LOC_Os03g57490	5_prime_UTR_premature_start_codon_gain_variant	LOW
qSNC3.32	Chr3	32783943	CAT	C	LOC_Os03g57500	splice_region_variant&intron_variant	LOW
qSNC3.32	Chr3	32784466	G	T	LOC_Os03g57500	missense_variant	MODERATE
qSNC3.32	Chr3	32784679	C	T	LOC_Os03g57500	missense_variant	MODERATE
qSNC3.32	Chr3	32784717	T	C	LOC_Os03g57500	missense_variant	MODERATE
qSNC3.32	Chr3	32785104	A	G	LOC_Os03g57500	missense_variant	MODERATE
qSNC3.32	Chr3	32793096	T	A	LOC_Os03g57510	missense_variant	MODERATE
qSNC3.32	Chr3	32802167	C	T	LOC_Os03g57530	missense_variant	MODERATE
qSNC3.32	Chr3	32810272	T	C	LOC_Os03g57540	missense_variant	MODERATE
qSNC3.32	Chr3	32810327	T	C	LOC_Os03g57540	missense_variant	MODERATE
qSNC3.32	Chr3	32810368	T	C	LOC_Os03g57540	missense_variant	MODERATE
qSNC3.32	Chr3	32810578	A	G	LOC_Os03g57540	missense_variant	MODERATE
qSNC3.32	Chr3	32810599	A	G	LOC_Os03g57540	missense_variant	MODERATE
qSNC3.32	Chr3	32814866	AAGTC	A	LOC_Os03g57560	frameshift_variant&splice_donor_variant&splice_region_variant&intron_variant	HIGH
qSNC3.32	Chr3	32815124	T	G	LOC_Os03g57560	missense_variant	MODERATE
qSNC3.32	Chr3	32815129	C	A	LOC_Os03g57560	missense_variant	MODERATE
qSNC3.32	Chr3	32817257	A	G	LOC_Os03g57560	missense_variant	MODERATE
qSNC3.32	Chr3	32818823	A	G	LOC_Os03g57560	missense_variant	MODERATE
qSNC3.32	Chr3	32820037	T	C	LOC_Os03g57560	missense_variant	MODERATE
qSNC3.32	Chr3	32820899	G	A	LOC_Os03g57560	missense_variant	MODERATE
qSNC3.32	Chr3	32827389	C	A	LOC_Os03g57569	stop_gained	HIGH
qSNC3.32	Chr3	32827676	A	T	LOC_Os03g57569	missense_variant	MODERATE
qSNC3.32	Chr3	32827718	T	C	LOC_Os03g57569	missense_variant	MODERATE
qSNC3.32	Chr3	32827956	G	A	LOC_Os03g57569	5_prime_UTR_premature_start_codon_gain_variant	LOW
qSNC3.32	Chr3	32829893	C	T	LOC_Os03g57580	missense_variant	MODERATE
qSNC3.32	Chr3	32834046	G	GGC	LOC_Os03g57600	frameshift_variant	HIGH
qSNC3.32	Chr3	32846854	G	A	LOC_Os03g57620	missense_variant	MODERATE
qSNC3.32	Chr3	32849464	A	G	LOC_Os03g57630	missense_variant	MODERATE
qSNC3.32	Chr3	32851790	T	G	LOC_Os03g57640	missense_variant	MODERATE
qSNC3.32	Chr3	32851860	T	C	LOC_Os03g57640	missense_variant	MODERATE
qSNC3.32	Chr3	32852520	A	ACGC	LOC_Os03g57640	disruptive_inframe_insertion	MODERATE
qSNC3.32	Chr3	32852549	A	G	LOC_Os03g57640	missense_variant	MODERATE
qSNC3.32	Chr3	32866468	C	G	LOC_Os03g57660	missense_variant	MODERATE
qSNC3.32	Chr3	32869511	C	A	LOC_Os03g57680	missense_variant	MODERATE
qSNC3.32	Chr3	32873847	C	G	LOC_Os03g57680	missense_variant	MODERATE
qSNC3.32	Chr3	32880847	G	A	LOC_Os03g57690	missense_variant	MODERATE
qSNC3.32	Chr3	32883072	G	C	LOC_Os03g57690	missense_variant	MODERATE
qSNC3.32	Chr3	32884283	C	T	LOC_Os03g57690	missense_variant	MODERATE
qSNC3.32	Chr3	32885134	GA	G	LOC_Os03g57690	splice_region_variant&intron_variant	LOW
qSNC3.32	Chr3	32897422	A	G	LOC_Os03g57720	missense_variant	MODERATE
qSNC3.32	Chr3	32913047	T	G	LOC_Os03g57760	missense_variant	MODERATE
qSNC3.32	Chr3	32913783	A	G	LOC_Os03g57760	missense_variant	MODERATE
qSNC3.32	Chr3	32919982	C	T	LOC_Os03g57770	missense_variant	MODERATE
qSNC3.32	Chr3	32926244	T	G	LOC_Os03g57780	5_prime_UTR_premature_start_codon_gain_variant	LOW
qSNC3.32	Chr3	32927566	G	A	LOC_Os03g57780	missense_variant	MODERATE
qSNC3.32	Chr3	32929221	A	T	LOC_Os03g57780	splice_region_variant&intron_variant	LOW
qSNC3.32	Chr3	32931454	C	CTA	LOC_Os03g57790	splice_acceptor_variant&intron_variant	HIGH
qSNC3.32	Chr3	32948326	T	G	LOC_Os03g57830	missense_variant	MODERATE
qSNC3.32	Chr3	32949240	T	C	LOC_Os03g57830	missense_variant	MODERATE
qSNC3.32	Chr3	32949389	C	T	LOC_Os03g57830	missense_variant	MODERATE
qSNC3.32	Chr3	32950761	G	A	LOC_Os03g57830	splice_region_variant&synonymous_variant	LOW
qSNC3.32	Chr3	32950775	T	A	LOC_Os03g57830	missense_variant	MODERATE
qSNC3.32	Chr3	32951716	G	T	LOC_Os03g57840	missense_variant	MODERATE
qSNC3.32	Chr3	32964002	C	T	LOC_Os03g57854	missense_variant	MODERATE
qSNC3.32	Chr3	32967487	CA	C	LOC_Os03g57870	splice_region_variant&intron_variant	LOW
qSNC3.32	Chr3	32974832	A	G	LOC_Os03g57890	missense_variant	MODERATE
qSNC3.32	Chr3	32975037	T	C	LOC_Os03g57890	missense_variant	MODERATE
qSNC3.32	Chr3	32976704	C	T	LOC_Os03g57890	splice_region_variant	LOW
qSNC3.32	Chr3	32982746	C	T	LOC_Os03g57900	missense_variant	MODERATE
qSNC3.32	Chr3	32984812	CT	C	LOC_Os03g57910	frameshift_variant	HIGH
qSNC3.32	Chr3	32984814	T	C	LOC_Os03g57910	missense_variant	MODERATE
qSNC3.32	Chr3	32987640	C	A	LOC_Os03g57920	missense_variant	MODERATE
qSNC3.32	Chr3	32987681	A	AGAG	LOC_Os03g57920	disruptive_inframe_insertion	MODERATE
qSNC3.32	Chr3	32987697	C	T	LOC_Os03g57920	missense_variant	MODERATE
qSNC3.32	Chr3	32987751	G	A	LOC_Os03g57920	missense_variant	MODERATE
qSNC3.32	Chr3	32987934	G	C	LOC_Os03g57920	missense_variant	MODERATE
qSNC3.32	Chr3	32989323	T	C	LOC_Os03g57930	missense_variant	MODERATE
qSNC3.32	Chr3	32989434	T	A	LOC_Os03g57930	missense_variant	MODERATE
qSNC3.32	Chr3	32989554	ACGGCGGCGG	A	LOC_Os03g57930	disruptive_inframe_deletion	MODERATE
qSNC3.32	Chr3	32989760	GA	G	LOC_Os03g57930	frameshift_variant	HIGH
qSNC3.32	Chr3	33000376	G	T	LOC_Os03g57940	splice_region_variant&intron_variant	LOW
qSNC3.32	Chr3	33000663	A	G	LOC_Os03g57940	missense_variant	MODERATE
qSNC3.32	Chr3	33000694	T	G	LOC_Os03g57940	missense_variant	MODERATE
qSNC3.32	Chr3	33001955	C	A	LOC_Os03g57940	splice_region_variant&intron_variant	LOW
qSNC3.32	Chr3	33004313	C	G	LOC_Os03g57940	splice_region_variant&intron_variant	LOW
qSNC3.32	Chr3	33013006	A	C	LOC_Os03g57950	missense_variant	MODERATE
qSNC3.32	Chr3	33020245	A	C	LOC_Os03g57960	missense_variant	MODERATE
qSNC3.32	Chr3	33022323	G	C	LOC_Os03g57960	missense_variant	MODERATE
qSNC3.32	Chr3	33028842	T	C	LOC_Os03g57990	missense_variant	MODERATE
qSNC3.32	Chr3	33028932	C	T	LOC_Os03g57990	missense_variant	MODERATE
qSNC3.32	Chr3	33031611	T	C	LOC_Os03g58000	missense_variant	MODERATE
qSNC3.32	Chr3	33031951	C	T	LOC_Os03g58000	missense_variant	MODERATE
qSNC3.32	Chr3	33032548	T	TGCTCTTG	LOC_Os03g58000	frameshift_variant	HIGH
qSNC3.32	Chr3	33032566	T	TG	LOC_Os03g58000	frameshift_variant	HIGH
qSNC3.32	Chr3	33034708	C	G	LOC_Os03g58010	missense_variant	MODERATE
qSNC3.32	Chr3	33049472	T	G	LOC_Os03g58060	5_prime_UTR_premature_start_codon_gain_variant	LOW
qSNC3.32	Chr3	33058233	T	C	LOC_Os03g58060	missense_variant	MODERATE
qSNC3.32	Chr3	33058469	AC	A	LOC_Os03g58060	frameshift_variant	HIGH
qSNC3.32	Chr3	33064465	A	G	LOC_Os03g58070	missense_variant	MODERATE
qSNC3.32	Chr3	33068094	A	G	LOC_Os03g58080	missense_variant	MODERATE
qSNC3.32	Chr3	33073989	ATCC	A	LOC_Os03g58090	disruptive_inframe_deletion	MODERATE
qSNC3.32	Chr3	33074101	A	G	LOC_Os03g58090	missense_variant	MODERATE
qSNC3.32	Chr3	33074353	C	A	LOC_Os03g58090	5_prime_UTR_premature_start_codon_gain_variant	LOW
qSNC3.32	Chr3	33079300	G	A	LOC_Os03g58100	missense_variant	MODERATE
qSNC3.32	Chr3	33084356	T	C	LOC_Os03g58110	missense_variant	MODERATE
qSNC3.32	Chr3	33085337	G	A	LOC_Os03g58110	missense_variant	MODERATE
qSNC3.32	Chr3	33091566	G	C	LOC_Os03g58120	missense_variant	MODERATE
qSNC3.32	Chr3	33091908	C	T	LOC_Os03g58120	missense_variant	MODERATE
qSNC3.32	Chr3	33092258	A	G	LOC_Os03g58120	missense_variant	MODERATE
qSNC3.32	Chr3	33095097	G	A	LOC_Os03g58120	missense_variant	MODERATE
qSNC3.32	Chr3	33101203	C	T	LOC_Os03g58140	missense_variant	MODERATE
qSNC3.32	Chr3	33101251	C	G	LOC_Os03g58140	missense_variant	MODERATE
qSNC3.32	Chr3	33103619	T	C	LOC_Os03g58150	missense_variant	MODERATE
qSNC3.32	Chr3	33106446	G	T	LOC_Os03g58160	5_prime_UTR_premature_start_codon_gain_variant	LOW
qSNC3.32	Chr3	33108275	T	G	LOC_Os03g58160	missense_variant	MODERATE
qSNC3.32	Chr3	33139792	G	A	LOC_Os03g58190	missense_variant	MODERATE
qSNC3.32	Chr3	33139985	T	C	LOC_Os03g58190	missense_variant	MODERATE
qSNC3.32	Chr3	33145433	T	C	LOC_Os03g58204	missense_variant	MODERATE
qSNC3.32	Chr3	33170657	C	CT	LOC_Os03g58230	splice_region_variant&intron_variant	LOW
qSNC3.32	Chr3	33171316	T	A	LOC_Os03g58230	missense_variant	MODERATE
qSNC3.32	Chr3	33184264	C	T	LOC_Os03g58240	splice_region_variant&intron_variant	LOW
qSNC3.32	Chr3	33187776	T	G	LOC_Os03g58250	missense_variant	MODERATE
qSNC3.32	Chr3	33191647	G	A	LOC_Os03g58250	5_prime_UTR_premature_start_codon_gain_variant	LOW
qSNC3.32	Chr3	33194768	G	A	LOC_Os03g58260	splice_region_variant&intron_variant	LOW
qSNC3.32	Chr3	33197065	T	C	LOC_Os03g58260	missense_variant	MODERATE
qSNC3.32	Chr3	33204644	CA	C	LOC_Os03g58280	splice_region_variant&intron_variant	LOW
qSNC3.32	Chr3	33204991	TGA	T	LOC_Os03g58280	splice_region_variant&intron_variant	LOW
qSNC3.32	Chr3	33207164	T	C	LOC_Os03g58280	stop_lost&splice_region_variant	HIGH
qSNC3.32	Chr3	33208143	A	G	LOC_Os03g58290	missense_variant	MODERATE
qSNC3.32	Chr3	33210225	ACGGCGGCGG	A	LOC_Os03g58290	disruptive_inframe_deletion	MODERATE
qSNC3.32	Chr3	33210321	T	G	LOC_Os03g58290	missense_variant	MODERATE
qSNC3.32	Chr3	33215113	C	A	LOC_Os03g58300	missense_variant	MODERATE
qSNC3.32	Chr3	33216892	A	C	LOC_Os03g58300	missense_variant	MODERATE
qSNC3.32	Chr3	33227077	A	C	LOC_Os03g58320	missense_variant	MODERATE
qSNC3.32	Chr3	33227078	T	G	LOC_Os03g58320	missense_variant	MODERATE
qSNC3.32	Chr3	33243352	T	A	LOC_Os03g58340	splice_region_variant&intron_variant	LOW
qSNC3.32	Chr3	33247087	C	T	LOC_Os03g58350	missense_variant	MODERATE
qSNC3.32	Chr3	33252518	C	T	LOC_Os03g58364	missense_variant	MODERATE
qSNC3.32	Chr3	33252571	G	A	LOC_Os03g58364	missense_variant	MODERATE
qSNC3.32	Chr3	33253268	A	G	LOC_Os03g58364	missense_variant	MODERATE
qSNC3.32	Chr3	33255914	A	C	LOC_Os03g58372	missense_variant	MODERATE
qSNC3.32	Chr3	33256028	G	A	LOC_Os03g58372	missense_variant	MODERATE
qSNC3.32	Chr3	33256163	G	C	LOC_Os03g58372	missense_variant	MODERATE
qSNC3.32	Chr3	33259721	C	A	LOC_Os03g58380	missense_variant	MODERATE
qSNC3.32	Chr3	33267385	A	G	LOC_Os03g58390	missense_variant	MODERATE
qSNC3.32	Chr3	33267505	A	G	LOC_Os03g58390	missense_variant	MODERATE
qSNC3.32	Chr3	33270702	A	C	LOC_Os03g58390	missense_variant	MODERATE
qSNC3.32	Chr3	33286670	T	G	LOC_Os03g58420	5_prime_UTR_premature_start_codon_gain_variant	LOW
qSNC3.32	Chr3	33287194	C	T	LOC_Os03g58420	missense_variant	MODERATE
qSNC3.32	Chr3	33300598	G	A	LOC_Os03g58450	missense_variant	MODERATE
qSNC3.32	Chr3	33300664	C	T	LOC_Os03g58450	missense_variant	MODERATE
qSNC3.32	Chr3	33300688	T	C	LOC_Os03g58450	missense_variant	MODERATE
qSNC3.32	Chr3	33311808	T	G	LOC_Os03g58480	5_prime_UTR_premature_start_codon_gain_variant	LOW
qSNC3.32	Chr3	33311907	C	T	LOC_Os03g58480	missense_variant	MODERATE
qSNC3.32	Chr3	33312267	C	T	LOC_Os03g58480	missense_variant	MODERATE
qSNC3.32	Chr3	33316107	T	A	LOC_Os03g58490	5_prime_UTR_premature_start_codon_gain_variant	LOW
qSNC3.32	Chr3	33316882	T	C	LOC_Os03g58490	missense_variant	MODERATE
qSNC3.32	Chr3	33317082	G	A	LOC_Os03g58490	missense_variant	MODERATE
qSNC3.32	Chr3	33317161	T	C	LOC_Os03g58490	missense_variant	MODERATE
qSNC3.32	Chr3	33317283	A	G	LOC_Os03g58490	missense_variant	MODERATE
qSNC3.32	Chr3	33317560	T	C	LOC_Os03g58490	missense_variant	MODERATE
qSNC3.32	Chr3	33317580	G	A	LOC_Os03g58490	missense_variant	MODERATE
qSNC3.32	Chr3	33317815	C	T	LOC_Os03g58490	missense_variant	MODERATE
qSNC3.32	Chr3	33317830	C	A	LOC_Os03g58490	missense_variant	MODERATE
qSNC3.32	Chr3	33318506	T	G	LOC_Os03g58490	missense_variant	MODERATE
qSNC3.32	Chr3	33318829	A	C	LOC_Os03g58490	missense_variant	MODERATE
qSNC3.32	Chr3	33318835	G	A	LOC_Os03g58490	missense_variant	MODERATE
qSNC3.32	Chr3	33324484	G	T	LOC_Os03g58510	missense_variant	MODERATE
qSNC3.32	Chr3	33330950	A	T	LOC_Os03g58530	missense_variant	MODERATE
qSNC3.32	Chr3	33332548	T	C	LOC_Os03g58530	missense_variant	MODERATE
qSNC3.32	Chr3	33334521	G	A	LOC_Os03g58540	missense_variant	MODERATE
qSNC3.32	Chr3	33335942	T	C	LOC_Os03g58540	missense_variant	MODERATE
qSNC3.32	Chr3	33346192	C	G	LOC_Os03g58570	5_prime_UTR_premature_start_codon_gain_variant	LOW
qSNC3.32	Chr3	33346597	T	G	LOC_Os03g58570	missense_variant	MODERATE
qSNC3.32	Chr3	33346651	TCCGCCGTCG	T	LOC_Os03g58570	disruptive_inframe_deletion	MODERATE
qSNC3.32	Chr3	33347217	G	A	LOC_Os03g58570	splice_region_variant&intron_variant	LOW
qSNC3.32	Chr3	33347738	G	T	LOC_Os03g58570	missense_variant	MODERATE
qSNC3.32	Chr3	33364068	A	G	LOC_Os03g58590	missense_variant	MODERATE
qSNC3.32	Chr3	33364070	C	G	LOC_Os03g58590	missense_variant	MODERATE
qSNC3.32	Chr3	33367024	C	T	LOC_Os03g58590	missense_variant	MODERATE
qSNC3.32	Chr3	33367582	G	T	LOC_Os03g58590	missense_variant	MODERATE
qSNC3.32	Chr3	33368240	CGAT	C	LOC_Os03g58590	disruptive_inframe_deletion&splice_region_variant	MODERATE
qSNC3.32	Chr3	33368507	G	A	LOC_Os03g58590	splice_region_variant&intron_variant	LOW
qSNC3.32	Chr3	33377257	G	T	LOC_Os03g58600	splice_region_variant&intron_variant	LOW
qSNC3.32	Chr3	33385835	T	G	LOC_Os03g58610	missense_variant	MODERATE
qSNC3.32	Chr3	33386000	C	T	LOC_Os03g58610	missense_variant	MODERATE
qSNC3.32	Chr3	33386776	C	A	LOC_Os03g58610	missense_variant	MODERATE
qSNC3.32	Chr3	33387027	A	G	LOC_Os03g58610	missense_variant	MODERATE
qSNC3.32	Chr3	33388255	G	C	LOC_Os03g58620	missense_variant	MODERATE
qSNC3.32	Chr3	33390752	T	C	LOC_Os03g58620	missense_variant	MODERATE
qSNC3.32	Chr3	33390855	A	AGGCGGC	LOC_Os03g58620	disruptive_inframe_insertion	MODERATE
qSNC3.32	Chr3	33390910	G	A	LOC_Os03g58620	missense_variant	MODERATE
qSNC3.32	Chr3	33390941	C	T	LOC_Os03g58620	missense_variant	MODERATE
qSNC3.32	Chr3	33399512	A	G	LOC_Os03g58640	missense_variant	MODERATE
qSNC3.32	Chr3	33403966	G	T	LOC_Os03g58650	missense_variant	MODERATE
qSNC3.32	Chr3	33404261	C	T	LOC_Os03g58650	missense_variant&splice_region_variant	MODERATE
qSNC3.32	Chr3	33404291	C	T	LOC_Os03g58650	missense_variant	MODERATE
qSNC3.32	Chr3	33404755	A	G	LOC_Os03g58650	missense_variant	MODERATE
qSNC3.32	Chr3	33417799	T	C	LOC_Os03g58670	missense_variant	MODERATE
qSNC3.32	Chr3	33417914	G	A	LOC_Os03g58670	missense_variant	MODERATE
qSNC3.32	Chr3	33418081	G	A	LOC_Os03g58670	missense_variant	MODERATE
qSNC3.32	Chr3	33427136	T	A	LOC_Os03g58700	missense_variant	MODERATE
qSNC3.32	Chr3	33428649	T	C	LOC_Os03g58700	splice_region_variant&intron_variant	LOW
qSNC3.32	Chr3	33433986	A	T	LOC_Os03g58710	missense_variant	MODERATE
qSNC3.32	Chr3	33434041	G	C	LOC_Os03g58710	missense_variant	MODERATE
qSNC3.32	Chr3	33435279	G	A	LOC_Os03g58710	missense_variant	MODERATE
qSNC3.32	Chr3	33437819	G	A	LOC_Os03g58720	missense_variant	MODERATE
qSNC3.32	Chr3	33438953	T	G	LOC_Os03g58720	missense_variant	MODERATE
qSNC3.32	Chr3	33441009	G	T	LOC_Os03g58720	missense_variant	MODERATE
qSNC3.32	Chr3	33442041	A	G	LOC_Os03g58720	missense_variant	MODERATE
qSNC3.32	Chr3	33443320	G	A	LOC_Os03g58720	splice_region_variant&intron_variant	LOW
qSNC3.32	Chr3	33443538	C	T	LOC_Os03g58720	splice_region_variant&intron_variant	LOW
qSNC3.32	Chr3	33466106	A	C	LOC_Os03g58764	missense_variant	MODERATE
qSNC3.32	Chr3	33467534	A	G	LOC_Os03g58764	missense_variant	MODERATE
qSNC3.32	Chr3	33467802	T	A	LOC_Os03g58764	missense_variant	MODERATE
qSNC3.32	Chr3	33467822	G	T	LOC_Os03g58764	missense_variant	MODERATE
qSNC3.32	Chr3	33479628	G	C	LOC_Os03g58780	5_prime_UTR_premature_start_codon_gain_variant	LOW
qSNC3.32	Chr3	33479773	G	C	LOC_Os03g58780	missense_variant	MODERATE
qSNC3.32	Chr3	33479775	G	C	LOC_Os03g58780	missense_variant	MODERATE
qSNC3.32	Chr3	33483158	C	A	LOC_Os03g58790	missense_variant	MODERATE
qSNC3.32	Chr3	33483934	G	A	LOC_Os03g58790	missense_variant	MODERATE
qSNC3.32	Chr3	33498007	T	A	LOC_Os03g58820	missense_variant	MODERATE
qSNC3.32	Chr3	33528082	C	T	LOC_Os03g58900	missense_variant	MODERATE
qSNC3.32	Chr3	33528474	C	CGAGGAG	LOC_Os03g58900	disruptive_inframe_insertion	MODERATE
qSNC3.32	Chr3	33531489	G	A	LOC_Os03g58910	missense_variant	MODERATE
qSNC3.32	Chr3	33533311	T	C	LOC_Os03g58910	missense_variant	MODERATE
qSNC3.32	Chr3	33533780	A	G	LOC_Os03g58910	missense_variant	MODERATE
qSNC3.32	Chr3	33533781	A	C	LOC_Os03g58910	missense_variant	MODERATE
qSNC3.32	Chr3	33535269	G	A	LOC_Os03g58910	missense_variant	MODERATE
qSNC3.32	Chr3	33535273	T	A	LOC_Os03g58910	missense_variant	MODERATE
qSNC3.32	Chr3	33535419	G	A	LOC_Os03g58910	missense_variant	MODERATE
qSNC3.32	Chr3	33536231	A	G	LOC_Os03g58910	missense_variant	MODERATE
qSNC3.32	Chr3	33536879	C	T	LOC_Os03g58910	missense_variant	MODERATE
qSNC3.32	Chr3	33537511	G	A	LOC_Os03g58910	missense_variant	MODERATE
qSNC3.32	Chr3	33537740	G	A	LOC_Os03g58910	missense_variant	MODERATE
qSNC3.32	Chr3	33538298	G	A	LOC_Os03g58910	splice_region_variant&intron_variant	LOW
qSNC3.32	Chr3	33542007	G	A	LOC_Os03g58910	missense_variant	MODERATE
qSNC3.32	Chr3	33542571	T	C	LOC_Os03g58910	missense_variant	MODERATE
qSNC3.32	Chr3	33544019	GGCT	G	LOC_Os03g58910	disruptive_inframe_deletion	MODERATE
qSNC3.32	Chr3	33549176	T	C	LOC_Os03g58920	missense_variant	MODERATE
qSNC3.32	Chr3	33549760	A	G	LOC_Os03g58920	missense_variant	MODERATE
qSNC3.32	Chr3	33550345	T	A	LOC_Os03g58920	missense_variant	MODERATE
qSNC3.32	Chr3	33553658	C	T	LOC_Os03g58930	missense_variant	MODERATE
qSNC3.32	Chr3	33553670	C	T	LOC_Os03g58930	missense_variant	MODERATE
qSNC3.32	Chr3	33579697	A	T	LOC_Os03g58970	missense_variant	MODERATE
qSNC3.32	Chr3	33581426	T	G	LOC_Os03g58970	missense_variant	MODERATE
qSNC3.32	Chr3	33582007	T	C	LOC_Os03g58970	missense_variant	MODERATE
qSNC3.32	Chr3	33582049	T	C	LOC_Os03g58970	missense_variant	MODERATE
qSNC3.32	Chr3	33582346	G	A	LOC_Os03g58970	missense_variant	MODERATE
qSNC3.32	Chr3	33582588	G	A	LOC_Os03g58970	missense_variant	MODERATE
qSNC3.32	Chr3	33582592	A	T	LOC_Os03g58970	missense_variant	MODERATE
qSNC3.32	Chr3	33582728	T	G	LOC_Os03g58970	missense_variant	MODERATE
qSNC3.32	Chr3	33584064	T	C	LOC_Os03g58970	splice_region_variant&intron_variant	LOW
qSNC3.32	Chr3	33588993	C	T	LOC_Os03g58990	splice_region_variant&intron_variant	LOW
qSNC3.32	Chr3	33588994	T	A	LOC_Os03g58990	splice_region_variant&intron_variant	LOW
qSNC3.32	Chr3	33589058	C	A	LOC_Os03g58990	missense_variant	MODERATE
qSNC3.32	Chr3	33589384	G	A	LOC_Os03g58990	missense_variant	MODERATE
qSNC3.32	Chr3	33591771	T	C	LOC_Os03g59010	missense_variant	MODERATE
qSNC3.32	Chr3	33594017	T	G	LOC_Os03g59020	missense_variant	MODERATE
qSNC3.32	Chr3	33597298	G	C	LOC_Os03g59020	missense_variant	MODERATE
qSNC3.32	Chr3	33599968	T	G	LOC_Os03g59030	missense_variant	MODERATE
qSNC3.32	Chr3	33600040	A	G	LOC_Os03g59030	missense_variant	MODERATE
qSNC3.32	Chr3	33608284	T	A	LOC_Os03g59040	splice_region_variant&intron_variant	LOW
qSNC3.32	Chr3	33608371	A	G	LOC_Os03g59040	missense_variant	MODERATE
qSNC3.32	Chr3	33612896	CCCTCCATAACCGCCG	C	LOC_Os03g59050	disruptive_inframe_deletion	MODERATE
qSNC3.32	Chr3	33625089	T	C	LOC_Os03g59060	splice_region_variant&synonymous_variant	LOW
qSNC3.32	Chr3	33625353	C	T	LOC_Os03g59060	splice_region_variant&intron_variant	LOW
qSNC3.32	Chr3	33627848	A	T	LOC_Os03g59070	missense_variant	MODERATE
qSNC3.32	Chr3	33629964	T	C	LOC_Os03g59070	missense_variant	MODERATE
qSNC3.32	Chr3	33633514	C	A	LOC_Os03g59080	splice_region_variant&intron_variant	LOW
qSNC3.32	Chr3	33635220	G	A	LOC_Os03g59080	splice_region_variant&intron_variant	LOW
qSNC3.32	Chr3	33635556	C	A	LOC_Os03g59080	splice_region_variant&intron_variant	LOW
qSNC3.32	Chr3	33635671	T	C	LOC_Os03g59080	missense_variant	MODERATE
qSNC3.32	Chr3	33649514	CGTG	C	LOC_Os03g59110	disruptive_inframe_deletion	MODERATE
qSNC3.32	Chr3	33649518	G	A	LOC_Os03g59110	missense_variant	MODERATE
qSNC3.32	Chr3	33659700	G	A	LOC_Os03g59120	missense_variant	MODERATE
qSNC3.32	Chr3	33660288	G	A	LOC_Os03g59120	missense_variant	MODERATE
qSNC3.32	Chr3	33660396	A	G	LOC_Os03g59120	missense_variant	MODERATE
qSNC3.32	Chr3	33660406	A	G	LOC_Os03g59120	splice_region_variant&synonymous_variant	LOW
qSNC3.32	Chr3	33661040	A	G	LOC_Os03g59120	missense_variant	MODERATE
qSNC3.32	Chr3	33680893	C	T	LOC_Os03g59146	missense_variant	MODERATE
qSNC3.32	Chr3	33681013	T	C	LOC_Os03g59146	missense_variant	MODERATE
qSNC3.32	Chr3	33683179	T	C	LOC_Os03g59146	splice_region_variant&intron_variant	LOW
qSNC3.32	Chr3	33683184	G	C	LOC_Os03g59146	splice_acceptor_variant&intron_variant	HIGH
qSNC3.32	Chr3	33684489	T	C	LOC_Os03g59146	splice_region_variant&intron_variant	LOW
qSNC3.32	Chr3	33685890	C	T	LOC_Os03g59152	missense_variant	MODERATE
qSNC3.32	Chr3	33686602	G	T	LOC_Os03g59152	missense_variant	MODERATE
qSNC3.32	Chr3	33687298	C	T	LOC_Os03g59152	missense_variant	MODERATE
qSNC3.32	Chr3	33694488	C	A	LOC_Os03g59170	missense_variant	MODERATE
qSNC3.32	Chr3	33694509	A	G	LOC_Os03g59170	missense_variant	MODERATE
qSNC3.32	Chr3	33694832	T	C	LOC_Os03g59170	missense_variant	MODERATE
qSNC3.32	Chr3	33694886	A	G	LOC_Os03g59170	splice_region_variant&intron_variant	LOW
qSNC3.32	Chr3	33695482	A	G	LOC_Os03g59170	missense_variant	MODERATE
qSNC3.32	Chr3	33695502	C	T	LOC_Os03g59170	missense_variant	MODERATE
qSNC3.32	Chr3	33695614	G	A	LOC_Os03g59170	missense_variant	MODERATE
qSNC3.32	Chr3	33697299	T	G	LOC_Os03g59180	missense_variant	MODERATE
qSNC3.32	Chr3	33697436	C	G	LOC_Os03g59180	missense_variant	MODERATE
qSNC3.32	Chr3	33697610	G	A	LOC_Os03g59180	missense_variant	MODERATE
qSNC3.32	Chr3	33712929	A	G	LOC_Os03g59200	missense_variant	MODERATE
qSNC3.32	Chr3	33713083	T	C	LOC_Os03g59200	missense_variant	MODERATE
qSNC3.32	Chr3	33719592	A	T	LOC_Os03g59220	splice_region_variant&intron_variant	LOW
qSNC3.32	Chr3	33738428	G	C	LOC_Os03g59250	splice_region_variant&intron_variant	LOW
qSNC3.32	Chr3	33738989	C	T	LOC_Os03g59250	missense_variant	MODERATE
qSNC3.32	Chr3	33744626	C	T	LOC_Os03g59264	missense_variant	MODERATE
qSNC3.32	Chr3	33744646	C	G	LOC_Os03g59264	missense_variant	MODERATE
qSNC3.32	Chr3	33744655	GTT	G	LOC_Os03g59264	frameshift_variant	HIGH
qSNC3.32	Chr3	33744664	C	CA	LOC_Os03g59264	frameshift_variant	HIGH
qSNC3.32	Chr3	33744981	C	T	LOC_Os03g59264	splice_donor_variant&intron_variant	HIGH
qSNC3.32	Chr3	33745053	C	T	LOC_Os03g59264	missense_variant	MODERATE
qSNC3.32	Chr3	33745257	T	A	LOC_Os03g59264	missense_variant	MODERATE
qSNC3.32	Chr3	33745843	G	C	LOC_Os03g59264	missense_variant	MODERATE
qSNC3.32	Chr3	33747325	G	C	LOC_Os03g59264	missense_variant	MODERATE
qSNC3.32	Chr3	33748263	A	C	LOC_Os03g59264	missense_variant	MODERATE
qSNC3.32	Chr3	33748372	G	A	LOC_Os03g59264	missense_variant	MODERATE
qSNC3.32	Chr3	33755603	T	C	LOC_Os03g59280	missense_variant	MODERATE
qSNC3.32	Chr3	33759296	T	C	LOC_Os03g59290	start_lost	HIGH
qSNC3.32	Chr3	33767407	T	C	LOC_Os03g59300	missense_variant	MODERATE
qSNC3.32	Chr3	33770702	G	C	LOC_Os03g59310	missense_variant	MODERATE
qSNC3.32	Chr3	33772082	G	A	LOC_Os03g59320	missense_variant	MODERATE
qSNC3.32	Chr3	33778840	A	G	LOC_Os03g59330	missense_variant	MODERATE
qSNC3.32	Chr3	33778886	T	A	LOC_Os03g59330	splice_region_variant&intron_variant	LOW
qSNC3.32	Chr3	33779605	G	A	LOC_Os03g59330	missense_variant	MODERATE
qSNC3.32	Chr3	33782604	C	T	LOC_Os03g59340	missense_variant	MODERATE
qSNC3.32	Chr3	33783597	A	G	LOC_Os03g59340	splice_region_variant&intron_variant	LOW
qSNC3.32	Chr3	33784976	G	A	LOC_Os03g59340	splice_region_variant&intron_variant	LOW
qSNC3.32	Chr3	33785102	T	C	LOC_Os03g59340	missense_variant	MODERATE
qSNC3.32	Chr3	33786178	G	A	LOC_Os03g59340	5_prime_UTR_premature_start_codon_gain_variant	LOW
qSNC3.32	Chr3	33788684	GCGC	G	LOC_Os03g59350	disruptive_inframe_deletion	MODERATE
qSNC3.32	Chr3	33788909	A	C	LOC_Os03g59350	missense_variant	MODERATE
qSNC3.32	Chr3	33810099	C	T	LOC_Os03g59390	splice_region_variant	LOW
qSNC3.32	Chr3	33812367	AG	A	LOC_Os03g59400	frameshift_variant	HIGH
qSNC3.32	Chr3	33812422	A	C	LOC_Os03g59400	stop_lost&splice_region_variant	HIGH
qSNC3.32	Chr3	33839490	C	T	LOC_Os03g59450	splice_region_variant&intron_variant	LOW
qSNC3.32	Chr3	33842931	T	G	LOC_Os03g59460	missense_variant	MODERATE
qSNC3.32	Chr3	33844875	T	G	LOC_Os03g59460	missense_variant	MODERATE
qSNC3.32	Chr3	33845129	G	A	LOC_Os03g59460	missense_variant	MODERATE
qSNC3.32	Chr3	33847340	C	T	LOC_Os03g59470	missense_variant	MODERATE
qSNC3.32	Chr3	33848973	C	T	LOC_Os03g59470	missense_variant	MODERATE
qSNC3.32	Chr3	33850626	A	C	LOC_Os03g59480	missense_variant&splice_region_variant	MODERATE
qSNC3.32	Chr3	33850632	A	G	LOC_Os03g59480	splice_region_variant&intron_variant	LOW
qSNC3.32	Chr3	33852760	C	T	LOC_Os03g59480	missense_variant	MODERATE
qSNC3.32	Chr3	33852817	T	A	LOC_Os03g59480	missense_variant	MODERATE
qSNC3.32	Chr3	33854374	ATCC	A	LOC_Os03g59480	disruptive_inframe_deletion	MODERATE
qSNC3.32	Chr3	33854510	G	C	LOC_Os03g59480	missense_variant	MODERATE
qSNC3.32	Chr3	33888193	G	C	LOC_Os03g59530	missense_variant	MODERATE
qSNC3.32	Chr3	33888383	C	T	LOC_Os03g59530	missense_variant	MODERATE
qSNC3.32	Chr3	33888632	G	T	LOC_Os03g59530	missense_variant	MODERATE
qSNC3.32	Chr3	33891166	T	A	LOC_Os03g59530	stop_gained	HIGH
qSNC3.32	Chr3	33892232	C	T	LOC_Os03g59540	stop_gained	HIGH
qSNC3.32	Chr3	33893194	T	G	LOC_Os03g59540	splice_region_variant&intron_variant	LOW
qSNC3.32	Chr3	33900871	A	G	LOC_Os03g59560	missense_variant	MODERATE
qSNC3.32	Chr3	33900936	T	C	LOC_Os03g59560	splice_region_variant&intron_variant	LOW
qSNC3.32	Chr3	33900938	C	T	LOC_Os03g59560	splice_region_variant&intron_variant	LOW
qSNC3.32	Chr3	33901685	ATCTCCATCTCCG	A	LOC_Os03g59560	disruptive_inframe_deletion	MODERATE
qSNC3.32	Chr3	33906284	A	G	LOC_Os03g59570	missense_variant	MODERATE
qSNC3.32	Chr3	33906714	T	C	LOC_Os03g59570	missense_variant	MODERATE
qSNC3.32	Chr3	33930430	A	G	LOC_Os03g59590	splice_region_variant&intron_variant	LOW
qSNC3.32	Chr3	33936157	A	G	LOC_Os03g59600	stop_lost&splice_region_variant	HIGH
qSNC3.32	Chr3	33936195	C	A	LOC_Os03g59600	missense_variant	MODERATE
qSNC3.32	Chr3	33936229	A	C	LOC_Os03g59600	missense_variant	MODERATE
qSNC3.32	Chr3	33936311	T	A	LOC_Os03g59600	splice_region_variant&intron_variant	LOW
qSNC3.32	Chr3	33936724	C	T	LOC_Os03g59600	missense_variant	MODERATE
qSNC3.32	Chr3	33937246	A	G	LOC_Os03g59600	missense_variant	MODERATE
qSNC3.32	Chr3	33937360	G	A	LOC_Os03g59600	missense_variant&splice_region_variant	MODERATE
qSNC3.32	Chr3	33937870	C	T	LOC_Os03g59600	missense_variant	MODERATE
qSNC3.32	Chr3	33937935	A	C	LOC_Os03g59600	missense_variant	MODERATE
qSNC3.32	Chr3	33942091	T	A	LOC_Os03g59620	missense_variant	MODERATE
qSNC3.32	Chr3	33942833	A	T	LOC_Os03g59620	splice_region_variant&intron_variant	LOW
qSNC3.32	Chr3	33959989	ATCTCTC	A	LOC_Os03g59640	splice_region_variant&intron_variant	LOW
qSNC3.32	Chr3	33963719	A	C	LOC_Os03g59650	missense_variant	MODERATE
qSNC3.32	Chr3	33964019	A	G	LOC_Os03g59650	missense_variant	MODERATE
qSNC3.32	Chr3	33965532	C	T	LOC_Os03g59650	missense_variant	MODERATE
qSNC3.32	Chr3	33966534	T	G	LOC_Os03g59650	missense_variant	MODERATE
qSNC3.32	Chr3	33966883	G	A	LOC_Os03g59650	missense_variant	MODERATE
qSNC3.32	Chr3	33966948	C	A	LOC_Os03g59650	missense_variant	MODERATE
qSNC3.32	Chr3	33994570	C	T	LOC_Os03g59690	missense_variant	MODERATE
qSNC3.32	Chr3	33994636	C	T	LOC_Os03g59690	missense_variant	MODERATE
qSNC3.32	Chr3	34002387	C	A	LOC_Os03g59720	5_prime_UTR_premature_start_codon_gain_variant	LOW
qSNC3.32	Chr3	34004909	C	T	LOC_Os03g59730	missense_variant	MODERATE
qSNC3.32	Chr3	34004938	T	G	LOC_Os03g59730	missense_variant	MODERATE
qSNC3.32	Chr3	34005054	CT	C	LOC_Os03g59730	frameshift_variant	HIGH
qSNC3.32	Chr3	34005056	GCT	G	LOC_Os03g59730	frameshift_variant	HIGH
qSNC3.32	Chr3	34005122	G	A	LOC_Os03g59730	missense_variant	MODERATE
qSNC3.32	Chr3	34005286	T	G	LOC_Os03g59730	missense_variant	MODERATE
qSNC3.32	Chr3	34005556	G	A	LOC_Os03g59730	missense_variant	MODERATE
qSNC3.32	Chr3	34009274	TGAG	T	LOC_Os03g59740	splice_region_variant&intron_variant	LOW
qSNC3.32	Chr3	34026153	A	G	LOC_Os03g59754	missense_variant	MODERATE
qSNC3.32	Chr3	34026156	A	G	LOC_Os03g59754	missense_variant	MODERATE
qSNC3.32	Chr3	34026482	T	C	LOC_Os03g59754	missense_variant	MODERATE
qSNC3.32	Chr3	34026510	T	C	LOC_Os03g59754	missense_variant	MODERATE
qSNC3.32	Chr3	34032509	G	A	LOC_Os03g59760	missense_variant	MODERATE
qSNC3.32	Chr3	34032565	G	A	LOC_Os03g59760	missense_variant	MODERATE
qSNC3.32	Chr3	34032965	A	G	LOC_Os03g59760	missense_variant	MODERATE
qSNC3.32	Chr3	34033211	C	T	LOC_Os03g59760	missense_variant	MODERATE
qSNC3.32	Chr3	34036339	T	A	LOC_Os03g59770	missense_variant	MODERATE
qSNC3.32	Chr3	34036420	A	G	LOC_Os03g59770	missense_variant	MODERATE
qSNC3.32	Chr3	34036514	A	ATCG	LOC_Os03g59770	disruptive_inframe_insertion	MODERATE
qSNC3.32	Chr3	34036524	CGGCGCCGTA	C	LOC_Os03g59770	disruptive_inframe_deletion	MODERATE
qSNC3.32	Chr3	34036613	A	G	LOC_Os03g59770	missense_variant	MODERATE
qSNC3.32	Chr3	34036670	A	ACGACGACGACGG	LOC_Os03g59770	disruptive_inframe_insertion	MODERATE
qSNC3.32	Chr3	34036690	G	C	LOC_Os03g59770	missense_variant	MODERATE
qSNC3.32	Chr3	34036694	T	C	LOC_Os03g59770	missense_variant	MODERATE
qSNC3.32	Chr3	34036726	G	A	LOC_Os03g59770	missense_variant	MODERATE
qSNC3.32	Chr3	34036749	G	T	LOC_Os03g59770	missense_variant	MODERATE
qSNC3.32	Chr3	34036750	G	A	LOC_Os03g59770	missense_variant	MODERATE
qSNC3.32	Chr3	34036828	A	C	LOC_Os03g59770	missense_variant	MODERATE
qSNC3.32	Chr3	34036845	T	G	LOC_Os03g59770	missense_variant	MODERATE
qSNC3.32	Chr3	34036951	G	A	LOC_Os03g59770	missense_variant	MODERATE
qSNC3.32	Chr3	34050488	T	G	LOC_Os03g59790	missense_variant	MODERATE
qSNC3.32	Chr3	34050630	G	C	LOC_Os03g59790	missense_variant	MODERATE
qSNC3.32	Chr3	34050651	T	C	LOC_Os03g59790	missense_variant	MODERATE
qSNC3.32	Chr3	34050717	C	A	LOC_Os03g59790	missense_variant	MODERATE
qSNC3.32	Chr3	34050732	T	TCGCCGCCGC	LOC_Os03g59790	disruptive_inframe_insertion	MODERATE
qSNC3.32	Chr3	34050755	GAAGGCGATCATCAGGCGC	G	LOC_Os03g59790	disruptive_inframe_deletion	MODERATE
qSNC3.32	Chr3	34050809	A	G	LOC_Os03g59790	missense_variant	MODERATE
qSNC3.32	Chr3	34069131	GATC	G	LOC_Os03g59830	disruptive_inframe_deletion	MODERATE
qSNC3.32	Chr3	34069139	CGT	C	LOC_Os03g59830	frameshift_variant	HIGH
qSNC3.32	Chr3	34069254	G	GTT	LOC_Os03g59830	frameshift_variant	HIGH
qSNC3.32	Chr3	34069314	A	T	LOC_Os03g59830	missense_variant	MODERATE
qSNC3.32	Chr3	34069316	T	G	LOC_Os03g59830	missense_variant	MODERATE
qSNC3.32	Chr3	34069328	G	A	LOC_Os03g59830	missense_variant	MODERATE
qSNC3.32	Chr3	34069348	GC	G	LOC_Os03g59830	frameshift_variant	HIGH
qSNC3.32	Chr3	34069361	A	ATCCACGGCGC	LOC_Os03g59830	frameshift_variant	HIGH
qSNC3.32	Chr3	34069397	G	C	LOC_Os03g59830	missense_variant	MODERATE
qSNC3.32	Chr3	34069414	TGCGC	T	LOC_Os03g59830	frameshift_variant	HIGH
qSNC3.32	Chr3	34069422	C	A	LOC_Os03g59830	missense_variant	MODERATE
qSNC3.32	Chr3	34069456	G	GGGCGGCGAT	LOC_Os03g59830	disruptive_inframe_insertion	MODERATE
qSNC3.32	Chr3	34069481	TGGCGCA	T	LOC_Os03g59830	disruptive_inframe_deletion	MODERATE
qSNC3.32	Chr3	34070451	T	C	LOC_Os03g59840	missense_variant	MODERATE
qSNC3.32	Chr3	34070551	A	G	LOC_Os03g59840	splice_region_variant&synonymous_variant	LOW
qSNC3.32	Chr3	34071733	G	A	LOC_Os03g59840	missense_variant	MODERATE
qSNC3.32	Chr3	34071759	A	C	LOC_Os03g59840	splice_region_variant&intron_variant	LOW
qSNC3.32	Chr3	34071889	T	TA	LOC_Os03g59840	frameshift_variant	HIGH
qSNC3.32	Chr3	34072208	C	T	LOC_Os03g59840	splice_region_variant&intron_variant	LOW
qSNC3.32	Chr3	34072494	C	A	LOC_Os03g59840	splice_region_variant&intron_variant	LOW
qSNC3.32	Chr3	34073186	C	A	LOC_Os03g59840	missense_variant	MODERATE
qSNC3.32	Chr3	34073502	ACCACCGCCGCCGCCGCCGCCACCACCGCCGCCGCTGCCGCCGCCGCCGCCGCCGCCG	A	LOC_Os03g59840	disruptive_inframe_deletion	MODERATE
qSNC3.32	Chr3	34074711	G	A	LOC_Os03g59850	missense_variant	MODERATE
qSNC3.32	Chr3	34075962	C	T	LOC_Os03g59850	missense_variant	MODERATE
qSNC3.32	Chr3	34077327	C	T	LOC_Os03g59860	missense_variant	MODERATE
qSNC3.32	Chr3	34077558	G	C	LOC_Os03g59860	missense_variant	MODERATE
qSNC3.32	Chr3	34077591	C	T	LOC_Os03g59860	missense_variant	MODERATE
qSNC3.32	Chr3	34077652	C	T	LOC_Os03g59860	splice_acceptor_variant&intron_variant	HIGH
qSNC3.32	Chr3	34077905	C	T	LOC_Os03g59860	missense_variant	MODERATE
qSNC3.32	Chr3	34077918	C	CATCT	LOC_Os03g59860	frameshift_variant&splice_region_variant	HIGH
qSNC3.32	Chr3	34079085	C	T	LOC_Os03g59860	missense_variant	MODERATE
qSNC3.32	Chr3	34079147	A	G	LOC_Os03g59860	missense_variant	MODERATE
qSNC3.32	Chr3	34123933	CA	C	LOC_Os03g59990	frameshift_variant	HIGH
qSNC3.32	Chr3	34201184	C	A	LOC_Os03g60140	missense_variant	MODERATE
qSNC3.32	Chr3	34201328	C	T	LOC_Os03g60140	missense_variant	MODERATE
qSNC3.32	Chr3	34201749	A	C	LOC_Os03g60140	missense_variant	MODERATE
qSNC3.32	Chr3	34201810	CGGA	C	LOC_Os03g60140	disruptive_inframe_deletion	MODERATE
qSNC3.32	Chr3	34202845	G	A	LOC_Os03g60150	missense_variant	MODERATE
qSNC3.32	Chr3	34202851	A	G	LOC_Os03g60150	missense_variant	MODERATE
qSNC3.32	Chr3	34205027	T	G	LOC_Os03g60150	missense_variant	MODERATE
qSNC3.32	Chr3	34220088	C	T	LOC_Os03g60170	missense_variant	MODERATE
qSNC3.32	Chr3	34220818	C	A	LOC_Os03g60170	missense_variant	MODERATE
qSNC3.32	Chr3	34221628	C	G	LOC_Os03g60170	missense_variant	MODERATE
qSNC3.32	Chr3	34221822	A	G	LOC_Os03g60170	splice_region_variant&intron_variant	LOW
qSNC3.32	Chr3	34222196	G	A	LOC_Os03g60170	missense_variant	MODERATE
qSNC3.32	Chr3	34229846	G	A	LOC_Os03g60180	missense_variant	MODERATE
qSNC3.32	Chr3	34230785	G	C	LOC_Os03g60180	missense_variant	MODERATE
qSNC3.32	Chr3	34230851	A	T	LOC_Os03g60180	missense_variant	MODERATE
qSNC3.32	Chr3	34230874	C	T	LOC_Os03g60180	missense_variant	MODERATE
qSNC3.32	Chr3	34231090	C	T	LOC_Os03g60180	missense_variant	MODERATE
qSNC3.32	Chr3	34234688	C	T	LOC_Os03g60190	5_prime_UTR_premature_start_codon_gain_variant	LOW
qSNC3.32	Chr3	34235332	G	T	LOC_Os03g60190	5_prime_UTR_premature_start_codon_gain_variant	LOW
qSNC3.32	Chr3	34236445	T	C	LOC_Os03g60190	missense_variant&splice_region_variant	MODERATE
qSNC3.32	Chr3	34236606	T	G	LOC_Os03g60190	missense_variant	MODERATE
qSNC3.32	Chr3	34237265	G	A	LOC_Os03g60190	missense_variant	MODERATE
qSNC3.32	Chr3	34237527	G	C	LOC_Os03g60190	missense_variant	MODERATE
qSNC3.32	Chr3	34237536	A	G	LOC_Os03g60190	missense_variant&splice_region_variant	MODERATE
qSNC3.32	Chr3	34239139	C	A	LOC_Os03g60200	missense_variant	MODERATE
qSNC3.32	Chr3	34239198	T	C	LOC_Os03g60200	missense_variant	MODERATE
qSNC3.32	Chr3	34239880	G	A	LOC_Os03g60200	missense_variant	MODERATE
qSNC3.32	Chr3	34243197	A	C	LOC_Os03g60210	missense_variant	MODERATE
qSNC3.32	Chr3	34243418	T	C	LOC_Os03g60210	missense_variant	MODERATE
qSNC3.32	Chr3	34246174	G	A	LOC_Os03g60220	5_prime_UTR_premature_start_codon_gain_variant	LOW
qSNC3.32	Chr3	34259476	G	A	LOC_Os03g60240	missense_variant	MODERATE
qSNC3.32	Chr3	34261895	T	G	LOC_Os03g60240	missense_variant	MODERATE
qSNC3.32	Chr3	34263683	A	G	LOC_Os03g60240	missense_variant	MODERATE
qSNC3.32	Chr3	34264444	A	T	LOC_Os03g60240	missense_variant	MODERATE
qSNC3.32	Chr3	34264543	G	A	LOC_Os03g60240	missense_variant	MODERATE
qSNC3.32	Chr3	34264924	A	C	LOC_Os03g60240	missense_variant	MODERATE
qSNC3.32	Chr3	34265096	G	A	LOC_Os03g60240	missense_variant	MODERATE
qSNC3.32	Chr3	34266422	A	G	LOC_Os03g60240	splice_region_variant&intron_variant	LOW
qSNC3.32	Chr3	34268502	C	T	LOC_Os03g60250	stop_gained	HIGH
qSNC3.32	Chr3	34271741	A	AGAG	LOC_Os03g60260	disruptive_inframe_insertion	MODERATE
qSNC3.32	Chr3	34272565	C	T	LOC_Os03g60260	missense_variant	MODERATE
qSNC3.32	Chr3	34272603	A	T	LOC_Os03g60260	missense_variant	MODERATE
qSNC3.32	Chr3	34284359	G	GGACGAC	LOC_Os03g60279	disruptive_inframe_insertion	MODERATE
qSNC3.32	Chr3	34285506	G	A	LOC_Os03g60279	missense_variant	MODERATE
qSNC3.32	Chr3	34285518	T	G	LOC_Os03g60279	missense_variant	MODERATE
qSNC3.32	Chr3	34290090	C	T	LOC_Os03g60300	missense_variant	MODERATE
qSNC3.32	Chr3	34290180	T	C	LOC_Os03g60300	missense_variant	MODERATE
qSNC3.32	Chr3	34291083	G	T	LOC_Os03g60300	missense_variant	MODERATE
qSNC3.32	Chr3	34292448	G	A	LOC_Os03g60300	missense_variant	MODERATE
qSNC3.32	Chr3	34298759	C	G	LOC_Os03g60310	missense_variant	MODERATE
qSNC3.32	Chr3	34299224	C	T	LOC_Os03g60310	missense_variant	MODERATE
qSNC3.32	Chr3	34299307	T	C	LOC_Os03g60310	missense_variant	MODERATE
qSNC3.32	Chr3	34299607	C	T	LOC_Os03g60310	missense_variant	MODERATE
qSNC3.32	Chr3	34299887	G	A	LOC_Os03g60310	missense_variant&splice_region_variant	MODERATE
qSNC3.32	Chr3	34299937	G	A	LOC_Os03g60310	missense_variant	MODERATE
qSNC3.32	Chr3	34299941	A	G	LOC_Os03g60310	missense_variant	MODERATE
qSNC3.32	Chr3	34299992	G	A	LOC_Os03g60310	missense_variant	MODERATE
qSNC3.32	Chr3	34300123	TGGGG	T	LOC_Os03g60310	frameshift_variant	HIGH
qSNC3.32	Chr3	34311816	A	G	LOC_Os03g60340	missense_variant	MODERATE
qSNC3.32	Chr3	34314482	G	T	LOC_Os03g60340	missense_variant	MODERATE
qSNC3.32	Chr3	34314644	C	T	LOC_Os03g60340	splice_region_variant&intron_variant	LOW
qSNC3.32	Chr3	34321479	C	T	LOC_Os03g60350	missense_variant	MODERATE
qSNC3.32	Chr3	34327589	T	C	LOC_Os03g60360	missense_variant	MODERATE
qSNC3.32	Chr3	34327835	G	A	LOC_Os03g60360	missense_variant	MODERATE
qSNC3.32	Chr3	34335138	T	G	LOC_Os03g60370	splice_region_variant&intron_variant	LOW
qSNC3.32	Chr3	34338729	G	A	LOC_Os03g60370	missense_variant	MODERATE
qSNC3.32	Chr3	34339634	T	C	LOC_Os03g60370	missense_variant	MODERATE
qSNC3.32	Chr3	34342610	A	G	LOC_Os03g60380	missense_variant	MODERATE
qSNC3.32	Chr3	34350488	G	C	LOC_Os03g60410	missense_variant	MODERATE
qSNC3.32	Chr3	34350556	T	C	LOC_Os03g60410	missense_variant	MODERATE
qSNC3.32	Chr3	34350740	C	T	LOC_Os03g60410	missense_variant	MODERATE
qSNC3.32	Chr3	34354525	T	C	LOC_Os03g60419	splice_region_variant	LOW
qSNC3.32	Chr3	34361891	C	T	LOC_Os03g60430	missense_variant	MODERATE
qSNC3.32	Chr3	34366857	C	T	LOC_Os03g60440	missense_variant	MODERATE
qSNC3.32	Chr3	34366992	C	T	LOC_Os03g60440	missense_variant	MODERATE
qSNC3.32	Chr3	34367092	A	T	LOC_Os03g60440	missense_variant	MODERATE
qSNC3.32	Chr3	34367097	G	A	LOC_Os03g60440	missense_variant	MODERATE
qSNC3.32	Chr3	34367107	C	T	LOC_Os03g60440	missense_variant	MODERATE
qSNC3.32	Chr3	34367187	G	GTGGCACCGGCAC	LOC_Os03g60440	disruptive_inframe_insertion	MODERATE
qSNC3.32	Chr3	34371709	A	G	LOC_Os03g60449	missense_variant	MODERATE
qSNC3.32	Chr3	34372195	T	G	LOC_Os03g60449	splice_region_variant&intron_variant	LOW
qSNC3.32	Chr3	34372243	T	C	LOC_Os03g60449	missense_variant	MODERATE
qSNC3.32	Chr3	34378483	G	A	LOC_Os03g60460	missense_variant	MODERATE
qSNC3.32	Chr3	34379879	A	T	LOC_Os03g60460	missense_variant	MODERATE
qSNC3.32	Chr3	34381879	T	C	LOC_Os03g60460	missense_variant	MODERATE
qSNC3.32	Chr3	34382985	A	G	LOC_Os03g60470	missense_variant	MODERATE
qSNC3.32	Chr3	34382991	G	A	LOC_Os03g60470	missense_variant	MODERATE
qSNC3.32	Chr3	34383183	A	G	LOC_Os03g60470	missense_variant	MODERATE
qSNC3.32	Chr3	34391531	GGGA	G	LOC_Os03g60500	disruptive_inframe_deletion	MODERATE
qSNC3.32	Chr3	34398032	TCAACAGATGGACATCTAA	T	LOC_Os03g60520	disruptive_inframe_deletion	MODERATE
qSNC3.32	Chr3	34399169	C	A	LOC_Os03g60520	missense_variant	MODERATE
qSNC3.32	Chr3	34400264	C	G	LOC_Os03g60520	missense_variant	MODERATE
qSNC3.32	Chr3	34411014	T	C	LOC_Os03g60540	missense_variant	MODERATE
qSNC3.32	Chr3	34415165	T	C	LOC_Os03g60550	missense_variant	MODERATE
qSNC3.32	Chr3	34415828	C	A	LOC_Os03g60550	splice_region_variant&intron_variant	LOW
qSNC3.32	Chr3	34417920	T	A	LOC_Os03g60550	missense_variant	MODERATE
qSNC3.32	Chr3	34431183	A	G	LOC_Os03g60580	missense_variant	MODERATE
qSNC3.32	Chr3	34435619	T	C	LOC_Os03g60600	missense_variant	MODERATE
qSNC3.32	Chr3	34437673	C	T	LOC_Os03g60600	missense_variant	MODERATE
qSNC3.32	Chr3	34437744	CTTG	C	LOC_Os03g60600	disruptive_inframe_deletion	MODERATE
qSNC3.32	Chr3	34440771	G	T	LOC_Os03g60610	missense_variant	MODERATE
qSNC3.32	Chr3	34456206	C	G	LOC_Os03g60630	missense_variant	MODERATE
qSNC3.32	Chr3	34476900	T	C	LOC_Os03g60650	missense_variant	MODERATE
qSNC3.32	Chr3	34477606	C	T	LOC_Os03g60650	missense_variant	MODERATE
qSNC3.32	Chr3	34477705	T	C	LOC_Os03g60650	missense_variant	MODERATE
qSNC3.32	Chr3	34488115	G	T	LOC_Os03g60660	missense_variant	MODERATE
qSNC3.32	Chr3	34488147	A	AATCTTTGCTTCAT	LOC_Os03g60660	frameshift_variant	HIGH
qSNC3.32	Chr3	34488181	A	G	LOC_Os03g60660	missense_variant	MODERATE
qSNC3.32	Chr3	34488209	T	C	LOC_Os03g60660	missense_variant	MODERATE
qSNC3.32	Chr3	34488228	CA	C	LOC_Os03g60660	frameshift_variant	HIGH
qSNC3.32	Chr3	34488341	A	T	LOC_Os03g60660	missense_variant	MODERATE
qSNC3.32	Chr3	34488343	A	G	LOC_Os03g60660	missense_variant	MODERATE
qSNC3.32	Chr3	34488380	A	C	LOC_Os03g60660	missense_variant	MODERATE
qSNC3.32	Chr3	34488469	G	T	LOC_Os03g60660	missense_variant	MODERATE
qSNC3.32	Chr3	34488496	G	A	LOC_Os03g60660	missense_variant	MODERATE
qSNC3.32	Chr3	34488499	G	A	LOC_Os03g60660	missense_variant	MODERATE
qSNC3.32	Chr3	34488553	A	G	LOC_Os03g60660	missense_variant	MODERATE
qSNC3.32	Chr3	34488584	T	C	LOC_Os03g60660	missense_variant	MODERATE
qSNC3.32	Chr3	34488611	G	T	LOC_Os03g60660	missense_variant	MODERATE
qSNC3.32	Chr3	34488632	G	T	LOC_Os03g60660	missense_variant	MODERATE
qSNC3.32	Chr3	34488670	A	G	LOC_Os03g60660	missense_variant	MODERATE
qSNC3.32	Chr3	34488694	A	G	LOC_Os03g60660	missense_variant	MODERATE
qSNC3.32	Chr3	34488701	G	GTTTCAAGT	LOC_Os03g60660	frameshift_variant	HIGH
qSNC3.32	Chr3	34488736	T	A	LOC_Os03g60660	stop_lost&splice_region_variant	HIGH
qSNC3.32	Chr3	34496198	A	C	LOC_Os03g60690	missense_variant	MODERATE
qSNC3.32	Chr3	34496617	T	C	LOC_Os03g60690	missense_variant	MODERATE
qSNC3.32	Chr3	34496835	G	A	LOC_Os03g60690	missense_variant	MODERATE
qSNC3.32	Chr3	34499157	C	T	LOC_Os03g60700	missense_variant	MODERATE
qSNC3.32	Chr3	34500764	C	CT	LOC_Os03g60700	splice_region_variant&intron_variant	LOW
qSNC3.32	Chr3	34500989	G	C	LOC_Os03g60700	missense_variant	MODERATE
qSNC3.32	Chr3	34505957	T	TAAAACAAG	LOC_Os03g60710	splice_region_variant&intron_variant	LOW
qSNC3.32	Chr3	34529404	C	T	LOC_Os03g60750	stop_gained	HIGH
qSNC3.32	Chr3	34529678	G	A	LOC_Os03g60750	splice_region_variant&intron_variant	LOW
qSNC3.32	Chr3	34536580	T	G	LOC_Os03g60780	missense_variant	MODERATE
qSNC3.32	Chr3	34538755	T	C	LOC_Os03g60780	missense_variant	MODERATE
qSNC3.32	Chr3	34539642	C	T	LOC_Os03g60790	missense_variant	MODERATE
qSNC3.32	Chr3	34540657	C	T	LOC_Os03g60790	splice_region_variant&intron_variant	LOW
qSNC3.32	Chr3	34545918	G	A	LOC_Os03g60810	missense_variant	MODERATE
qSNC3.32	Chr3	34546446	T	G	LOC_Os03g60810	missense_variant	MODERATE
qSNC3.32	Chr3	34547715	G	C	LOC_Os03g60810	missense_variant	MODERATE
qSNC3.32	Chr3	34556441	C	CA	LOC_Os03g60820	splice_region_variant&intron_variant	LOW
qSNC3.32	Chr3	34560208	C	G	LOC_Os03g60820	missense_variant	MODERATE
qSNC3.32	Chr3	34560694	A	G	LOC_Os03g60820	5_prime_UTR_premature_start_codon_gain_variant	LOW
qSNC3.32	Chr3	34574764	G	C	LOC_Os03g60850	missense_variant	MODERATE
qSNC3.32	Chr3	34575004	T	C	LOC_Os03g60850	missense_variant	MODERATE
qSNC3.32	Chr3	34576230	C	G	LOC_Os03g60850	splice_region_variant&synonymous_variant	LOW
qSNC3.32	Chr3	34576313	A	AGG	LOC_Os03g60850	splice_region_variant&intron_variant	LOW
qSNC3.32	Chr3	34594042	G	T	LOC_Os03g60870	missense_variant	MODERATE
qSNC3.32	Chr3	34598002	G	A	LOC_Os03g60880	missense_variant	MODERATE
qSNC3.32	Chr3	34603692	A	C	LOC_Os03g60890	splice_region_variant&intron_variant	LOW
qSNC3.32	Chr3	34603952	A	C	LOC_Os03g60890	missense_variant	MODERATE
qSNC3.32	Chr3	34605459	G	T	LOC_Os03g60890	missense_variant	MODERATE
qSNC3.32	Chr3	34605460	C	T	LOC_Os03g60890	missense_variant	MODERATE
qSNC3.32	Chr3	34605696	T	C	LOC_Os03g60890	missense_variant	MODERATE
qSNC3.32	Chr3	34605713	A	G	LOC_Os03g60890	missense_variant	MODERATE
qSNC3.32	Chr3	34607536	C	T	LOC_Os03g60900	splice_region_variant	LOW
qSNC3.32	Chr3	34613378	A	C	LOC_Os03g60910	missense_variant	MODERATE
qSNC3.32	Chr3	34613439	A	C	LOC_Os03g60910	missense_variant	MODERATE
qSNC3.32	Chr3	34619501	T	G	LOC_Os03g60930	missense_variant	MODERATE
qSNC3.32	Chr3	34622162	G	T	LOC_Os03g60930	missense_variant	MODERATE
qSNC3.32	Chr3	34622889	T	A	LOC_Os03g60930	missense_variant	MODERATE
qSNC3.32	Chr3	34624846	A	G	LOC_Os03g60930	missense_variant	MODERATE
qSNC3.32	Chr3	34625010	G	A	LOC_Os03g60930	missense_variant	MODERATE
qSNC3.32	Chr3	34625106	A	G	LOC_Os03g60930	missense_variant	MODERATE
qSNC3.32	Chr3	34625107	C	T	LOC_Os03g60930	missense_variant	MODERATE
qSNC3.32	Chr3	34625163	A	G	LOC_Os03g60930	splice_region_variant&intron_variant	LOW
qSNC3.32	Chr3	34625416	A	G	LOC_Os03g60930	missense_variant	MODERATE
qSNC3.32	Chr3	34631061	G	C	LOC_Os03g60939	splice_region_variant&synonymous_variant	LOW
qSNC3.32	Chr3	34631069	TC	T	LOC_Os03g60939	splice_region_variant&intron_variant	LOW
qSNC3.32	Chr3	34631646	T	C	LOC_Os03g60939	splice_region_variant&intron_variant	LOW
qSNC3.32	Chr3	34631675	G	A	LOC_Os03g60939	missense_variant	MODERATE
qSNC3.32	Chr3	34631732	A	G	LOC_Os03g60939	missense_variant	MODERATE
qSNC3.32	Chr3	34631853	G	T	LOC_Os03g60939	splice_region_variant&intron_variant	LOW
qSNC3.32	Chr3	34631875	C	T	LOC_Os03g60939	missense_variant	MODERATE
qSNC3.32	Chr3	34631965	TG	T	LOC_Os03g60939	splice_region_variant&intron_variant	LOW
qSNC3.32	Chr3	34632053	T	C	LOC_Os03g60939	splice_region_variant&intron_variant	LOW
qSNC3.32	Chr3	34633920	A	C	LOC_Os03g60950	splice_region_variant&intron_variant	LOW
qSNC3.32	Chr3	34634749	C	A	LOC_Os03g60950	missense_variant	MODERATE
qSNC3.32	Chr3	34634825	T	TG	LOC_Os03g60950	frameshift_variant	HIGH
qSNC3.32	Chr3	34634844	CAA	C	LOC_Os03g60950	frameshift_variant	HIGH
qSNC3.32	Chr3	34634851	A	T	LOC_Os03g60950	missense_variant	MODERATE
qSNC3.32	Chr3	34634911	A	G	LOC_Os03g60950	missense_variant	MODERATE
qSNC3.32	Chr3	34634912	G	A	LOC_Os03g60950	missense_variant	MODERATE
qSNC3.32	Chr3	34636976	G	GCGCGGC	LOC_Os03g60960	disruptive_inframe_insertion	MODERATE
qSNC3.32	Chr3	34637005	C	G	LOC_Os03g60960	missense_variant	MODERATE
qSNC3.32	Chr3	34637006	G	A	LOC_Os03g60960	missense_variant	MODERATE
qSNC3.32	Chr3	34637447	G	A	LOC_Os03g60960	missense_variant	MODERATE
qSNC3.32	Chr3	34637544	A	AGTC	LOC_Os03g60960	splice_acceptor_variant&intron_variant	HIGH
qSNC3.32	Chr3	34637715	A	C	LOC_Os03g60960	missense_variant	MODERATE
qSNC3.32	Chr3	34637849	A	G	LOC_Os03g60960	missense_variant	MODERATE
qSNC3.32	Chr3	34637984	GGCC	G	LOC_Os03g60960	disruptive_inframe_deletion	MODERATE
qSNC3.32	Chr3	34638015	G	GGCT	LOC_Os03g60960	disruptive_inframe_insertion	MODERATE
qSNC3.32	Chr3	34638249	AGGT	A	LOC_Os03g60960	disruptive_inframe_deletion	MODERATE
qSNC3.32	Chr3	34638288	A	C	LOC_Os03g60960	missense_variant	MODERATE
qSNC3.32	Chr3	34638383	G	C	LOC_Os03g60960	missense_variant	MODERATE
qSNC3.32	Chr3	34638399	C	T	LOC_Os03g60960	missense_variant	MODERATE
qSNC3.32	Chr3	34639107	C	T	LOC_Os03g60976	missense_variant	MODERATE
qSNC3.32	Chr3	34639117	C	T	LOC_Os03g60976	missense_variant	MODERATE
qSNC3.32	Chr3	34639179	C	T	LOC_Os03g60976	missense_variant	MODERATE
qSNC3.32	Chr3	34639184	T	G	LOC_Os03g60976	missense_variant	MODERATE
qSNC3.32	Chr3	34639270	T	C	LOC_Os03g60976	splice_region_variant&intron_variant	LOW
qSNC3.32	Chr3	34639527	T	TAG	LOC_Os03g60976	splice_region_variant&intron_variant	LOW
qSNC3.32	Chr3	34639566	T	C	LOC_Os03g60976	missense_variant	MODERATE
qSNC3.32	Chr3	34639638	T	C	LOC_Os03g60976	missense_variant	MODERATE
qSNC3.32	Chr3	34639799	C	G	LOC_Os03g60976	missense_variant	MODERATE
qSNC3.32	Chr3	34641304	T	TA	LOC_Os03g60976	splice_region_variant&intron_variant	LOW
qSNC3.32	Chr3	34642671	T	C	LOC_Os03g60976	missense_variant	MODERATE
qSNC3.32	Chr3	34643138	A	C	LOC_Os03g60976	missense_variant	MODERATE
qSNC3.32	Chr3	34643160	T	TCTGCTG	LOC_Os03g60976	disruptive_inframe_insertion	MODERATE
qSNC3.32	Chr3	34643260	A	G	LOC_Os03g60976	missense_variant	MODERATE
qSNC3.32	Chr3	34644400	A	AGCGGCGGC	LOC_Os03g60976	frameshift_variant	HIGH
qSNC3.32	Chr3	34644474	A	G	LOC_Os03g60976	missense_variant	MODERATE
qSNC3.32	Chr3	34644484	CGCG	C	LOC_Os03g60976	disruptive_inframe_deletion	MODERATE
qSNC3.32	Chr3	34644552	C	G	LOC_Os03g60976	missense_variant	MODERATE
qSNC3.32	Chr3	34644601	GAGC	G	LOC_Os03g60976	disruptive_inframe_deletion	MODERATE
qSNC3.32	Chr3	34646300	C	T	LOC_Os03g60992	missense_variant	MODERATE
qSNC3.32	Chr3	34646384	A	G	LOC_Os03g60992	missense_variant	MODERATE
qSNC3.32	Chr3	34650290	A	T	LOC_Os03g60992	missense_variant	MODERATE
qSNC3.32	Chr3	34650294	T	A	LOC_Os03g60992	missense_variant	MODERATE
qSNC3.32	Chr3	34650379	A	T	LOC_Os03g60992	missense_variant	MODERATE
qSNC3.32	Chr3	34650391	A	G	LOC_Os03g60992	missense_variant	MODERATE
qSNC3.32	Chr3	34650401	C	G	LOC_Os03g60992	missense_variant	MODERATE
qSNC3.32	Chr3	34650402	A	C	LOC_Os03g60992	missense_variant	MODERATE
qSNC3.32	Chr3	34653320	G	C	LOC_Os03g60992	missense_variant	MODERATE
qSNC3.32	Chr3	34653326	C	T	LOC_Os03g60992	missense_variant	MODERATE
qSNC3.32	Chr3	34653344	T	C	LOC_Os03g60992	missense_variant	MODERATE
qSNC3.32	Chr3	34653356	G	C	LOC_Os03g60992	missense_variant	MODERATE
qSNC3.32	Chr3	34653451	G	A	LOC_Os03g60992	missense_variant	MODERATE
qSNC3.32	Chr3	34653464	C	T	LOC_Os03g60992	missense_variant	MODERATE
qSNC3.32	Chr3	34682996	A	C	LOC_Os03g61050	missense_variant	MODERATE
qSNC3.32	Chr3	34683605	G	A	LOC_Os03g61050	missense_variant	MODERATE
qSNC3.32	Chr3	34685369	A	G	LOC_Os03g61050	missense_variant	MODERATE
qSNC3.32	Chr3	34687178	T	C	LOC_Os03g61050	splice_region_variant&intron_variant	LOW
qSNC3.32	Chr3	34689631	C	T	LOC_Os03g61060	missense_variant	MODERATE
qSNC3.32	Chr3	34690327	C	A	LOC_Os03g61060	missense_variant	MODERATE
qSNC3.32	Chr3	34695167	A	C	LOC_Os03g61070	stop_lost	HIGH
qSNC3.32	Chr3	34695208	A	C	LOC_Os03g61070	missense_variant	MODERATE
qSNC3.32	Chr3	34695799	A	G	LOC_Os03g61070	missense_variant	MODERATE
qSNC3.32	Chr3	34701440	C	T	LOC_Os03g61080	missense_variant	MODERATE
qSNC3.32	Chr3	34701598	G	A	LOC_Os03g61080	missense_variant	MODERATE
qSNC3.32	Chr3	34702324	G	A	LOC_Os03g61080	missense_variant	MODERATE
qSNC3.32	Chr3	34702991	C	A	LOC_Os03g61080	splice_region_variant&intron_variant	LOW
qSNC3.32	Chr3	34708422	C	T	LOC_Os03g61100	missense_variant	MODERATE
qSNC3.32	Chr3	34716777	G	GA	LOC_Os03g61120	splice_region_variant&intron_variant	LOW
qSNC3.32	Chr3	34717434	C	T	LOC_Os03g61120	missense_variant	MODERATE
qSNC3.32	Chr3	34718305	A	G	LOC_Os03g61120	splice_region_variant&intron_variant	LOW
qSNC3.32	Chr3	34720589	G	C	LOC_Os03g61120	splice_region_variant&intron_variant	LOW
qSNC3.32	Chr3	34726120	G	A	LOC_Os03g61130	splice_region_variant&intron_variant	LOW
qSNC3.32	Chr3	34726575	A	G	LOC_Os03g61130	missense_variant	MODERATE
qSNC3.32	Chr3	34733838	C	T	LOC_Os03g61150	missense_variant	MODERATE
qSNC3.32	Chr3	34733882	T	C	LOC_Os03g61150	missense_variant	MODERATE
qSNC3.32	Chr3	34734259	C	G	LOC_Os03g61150	missense_variant	MODERATE
qSNC3.32	Chr3	34740021	G	A	LOC_Os03g61160	missense_variant	MODERATE
qSNC3.32	Chr3	34740213	G	T	LOC_Os03g61160	missense_variant	MODERATE
qSNC3.32	Chr3	34759751	A	G	LOC_Os03g61210	missense_variant	MODERATE
qSNC3.32	Chr3	34762995	T	A	LOC_Os03g61210	5_prime_UTR_premature_start_codon_gain_variant	LOW
qSNC3.32	Chr3	34766256	G	GGAGGGGGCATACGGGAGCGAC	LOC_Os03g61220	disruptive_inframe_insertion	MODERATE
qSNC3.32	Chr3	34778872	G	GGC	LOC_Os03g61240	start_retained_variant	MODIFIER
qSNC3.32	Chr3	34779110	CG	C	LOC_Os03g61240	frameshift_variant	HIGH
qSNC3.32	Chr3	34785480	T	C	LOC_Os03g61260	5_prime_UTR_premature_start_codon_gain_variant	LOW
qSNC3.32	Chr3	34785590	G	A	LOC_Os03g61260	missense_variant	MODERATE
qSNC3.32	Chr3	34792785	C	G	LOC_Os03g61270	5_prime_UTR_premature_start_codon_gain_variant	LOW
qSNC3.32	Chr3	34792874	C	G	LOC_Os03g61270	5_prime_UTR_premature_start_codon_gain_variant	LOW
qSNC3.32	Chr3	34793200	A	C	LOC_Os03g61270	missense_variant	MODERATE
qSNC3.32	Chr3	34793557	G	A	LOC_Os03g61270	missense_variant	MODERATE
qSNC3.32	Chr3	34793568	C	T	LOC_Os03g61270	missense_variant	MODERATE
qSNC3.32	Chr3	34793627	CATCTCTTTGTCTAGATCG	C	LOC_Os03g61270	disruptive_inframe_deletion	MODERATE
qSNC3.32	Chr3	34797515	A	G	LOC_Os03g61280	5_prime_UTR_premature_start_codon_gain_variant	LOW
qSNC3.32	Chr3	34798366	C	A	LOC_Os03g61280	5_prime_UTR_premature_start_codon_gain_variant	LOW
qSNC3.32	Chr3	34798444	C	T	LOC_Os03g61280	5_prime_UTR_premature_start_codon_gain_variant	LOW
qSNC3.32	Chr3	34798890	A	G	LOC_Os03g61280	5_prime_UTR_premature_start_codon_gain_variant	LOW
qSNC3.32	Chr3	34799055	C	G	LOC_Os03g61280	5_prime_UTR_premature_start_codon_gain_variant	LOW
qSNC3.32	Chr3	34799087	A	T	LOC_Os03g61280	initiator_codon_variant	LOW
qSNC3.32	Chr3	34799121	C	A	LOC_Os03g61280	missense_variant	MODERATE
qSNC3.32	Chr3	34799474	C	T	LOC_Os03g61280	splice_region_variant&intron_variant	LOW
qSNC3.32	Chr3	34799593	G	A	LOC_Os03g61280	missense_variant	MODERATE
qSNC3.32	Chr3	34799617	T	G	LOC_Os03g61280	missense_variant	MODERATE
qSNC3.32	Chr3	34799644	A	G	LOC_Os03g61280	missense_variant	MODERATE
qSNC3.32	Chr3	34799681	GTATA	G	LOC_Os03g61280	splice_region_variant&intron_variant	LOW
qSNC3.32	Chr3	34799770	CGATG	C	LOC_Os03g61280	splice_region_variant&intron_variant	LOW
qSNC3.32	Chr3	34799815	C	T	LOC_Os03g61280	missense_variant	MODERATE
qSNC3.32	Chr3	34799934	A	C	LOC_Os03g61280	missense_variant	MODERATE
qSNC3.32	Chr3	34799986	C	A	LOC_Os03g61280	missense_variant	MODERATE
qSNC3.32	Chr3	34800121	G	C	LOC_Os03g61280	missense_variant	MODERATE
qSNC3.32	Chr3	34800138	A	G	LOC_Os03g61280	missense_variant	MODERATE
qSNC3.32	Chr3	34800160	G	T	LOC_Os03g61280	missense_variant	MODERATE
qSNC3.32	Chr3	34800361	G	A	LOC_Os03g61280	missense_variant	MODERATE
qSNC3.32	Chr3	34800523	G	A	LOC_Os03g61280	missense_variant	MODERATE
qSNC3.32	Chr3	34800549	T	TGCG	LOC_Os03g61280	disruptive_inframe_insertion	MODERATE
qSNC3.32	Chr3	34800854	T	C	LOC_Os03g61280	splice_region_variant	LOW
qSNC3.32	Chr3	34806914	T	G	LOC_Os03g61290	missense_variant	MODERATE
qSNC3.32	Chr3	34811943	A	G	LOC_Os03g61310	missense_variant	MODERATE
qSNC3.32	Chr3	34812613	G	A	LOC_Os03g61310	splice_region_variant&intron_variant	LOW
qSNC3.32	Chr3	34817271	C	G	LOC_Os03g61330	splice_region_variant	LOW
qSNC3.32	Chr3	34819917	G	A	LOC_Os03g61330	synonymous_variant	LOW
qSNC3.32	Chr3	34820100	C	G	LOC_Os03g61330	5_prime_UTR_premature_start_codon_gain_variant	LOW
qSNC3.32	Chr3	34820119	C	A	LOC_Os03g61330	5_prime_UTR_premature_start_codon_gain_variant	LOW
qSNC3.32	Chr3	34820184	T	C	LOC_Os03g61330	splice_region_variant&intron_variant	LOW
qSNC3.32	Chr3	34820676	GCATAGGAAT	G	LOC_Os03g61340	splice_region_variant	LOW
qSNC3.32	Chr3	34820898	G	A	LOC_Os03g61340	missense_variant	MODERATE
qSNC3.32	Chr3	34820965	G	C	LOC_Os03g61340	missense_variant	MODERATE
qSNC3.32	Chr3	34821046	T	C	LOC_Os03g61340	missense_variant	MODERATE
qSNC3.32	Chr3	34822045	C	G	LOC_Os03g61340	missense_variant	MODERATE
qSNC3.32	Chr3	34822938	T	A	LOC_Os03g61340	missense_variant	MODERATE
qSNC3.32	Chr3	34823392	T	C	LOC_Os03g61340	missense_variant	MODERATE
qSNC3.32	Chr3	34823454	ACCG	A	LOC_Os03g61340	disruptive_inframe_deletion	MODERATE
qSNC3.32	Chr3	34825694	A	G	LOC_Os03g61360	missense_variant	MODERATE
qSNC3.32	Chr3	34825815	G	A	LOC_Os03g61360	missense_variant	MODERATE
qSNC3.32	Chr3	34825968	C	A	LOC_Os03g61360	missense_variant	MODERATE
qSNC3.32	Chr3	34826013	T	C	LOC_Os03g61360	missense_variant	MODERATE
qSNC3.32	Chr3	34826039	AGCGGCAGCGGCGGCG	A	LOC_Os03g61360	disruptive_inframe_deletion	MODERATE
qSNC3.32	Chr3	34826099	G	C	LOC_Os03g61360	missense_variant	MODERATE
qSNC3.32	Chr3	34827769	T	C	LOC_Os03g61360	missense_variant	MODERATE
qSNC3.32	Chr3	34827808	T	C	LOC_Os03g61360	missense_variant	MODERATE
qSNC3.32	Chr3	34828872	ATGCTCTCTAGC	A	LOC_Os03g61360	frameshift_variant&start_lost	HIGH
qSNC3.32	Chr3	34851991	T	G	LOC_Os03g61410	stop_lost	HIGH
qSNC3.32	Chr3	34852039	C	G	LOC_Os03g61410	missense_variant	MODERATE
qSNC3.32	Chr3	34852469	AACG	A	LOC_Os03g61410	disruptive_inframe_deletion	MODERATE
qSNC3.32	Chr3	34852482	TTTAA	T	LOC_Os03g61410	start_retained_variant	MODIFIER
qSNC3.32	Chr3	34853249	T	C	LOC_Os03g61419	missense_variant	MODERATE
qSNC3.32	Chr3	34853619	GA	G	LOC_Os03g61419	frameshift_variant	HIGH
qSNC3.32	Chr3	34853630	C	A	LOC_Os03g61419	missense_variant	MODERATE
qSNC3.32	Chr3	34853643	T	C	LOC_Os03g61419	missense_variant	MODERATE
qSNC3.32	Chr3	34853651	G	A	LOC_Os03g61419	missense_variant	MODERATE
qSNC3.32	Chr3	34853690	G	A	LOC_Os03g61419	missense_variant	MODERATE
qSNC3.32	Chr3	34853693	T	G	LOC_Os03g61419	missense_variant	MODERATE
qSNC3.32	Chr3	34853695	T	G	LOC_Os03g61419	missense_variant	MODERATE
qSNC3.32	Chr3	34853711	G	A	LOC_Os03g61419	missense_variant	MODERATE
qSNC3.32	Chr3	34853733	C	T	LOC_Os03g61419	missense_variant	MODERATE
qSNC3.32	Chr3	34853735	A	G	LOC_Os03g61419	missense_variant	MODERATE
qSNC3.32	Chr3	34853771	C	T	LOC_Os03g61419	missense_variant	MODERATE
qSNC3.32	Chr3	34853795	A	G	LOC_Os03g61419	missense_variant	MODERATE
qSNC3.32	Chr3	34853802	A	C	LOC_Os03g61419	missense_variant	MODERATE
qSNC3.32	Chr3	34853805	G	A	LOC_Os03g61419	missense_variant	MODERATE
qSNC3.32	Chr3	34853892	G	A	LOC_Os03g61419	missense_variant	MODERATE
qSNC3.32	Chr3	34853914	G	A	LOC_Os03g61419	splice_region_variant&intron_variant	LOW
qSNC3.32	Chr3	34854157	T	C	LOC_Os03g61419	missense_variant	MODERATE
qSNC3.32	Chr3	34854164	C	T	LOC_Os03g61419	missense_variant	MODERATE
qSNC3.32	Chr3	34854170	G	GTAGCGAA	LOC_Os03g61419	frameshift_variant&stop_gained	HIGH
qSNC3.32	Chr3	34854230	T	C	LOC_Os03g61419	missense_variant	MODERATE
qSNC3.32	Chr3	34857333	G	GGT	LOC_Os03g61430	frameshift_variant	HIGH
qSNC3.32	Chr3	34857337	C	G	LOC_Os03g61430	missense_variant	MODERATE
qSNC3.32	Chr3	34857357	T	C	LOC_Os03g61430	missense_variant	MODERATE
qSNC3.32	Chr3	34857406	C	G	LOC_Os03g61430	missense_variant	MODERATE
qSNC3.32	Chr3	34857410	C	A	LOC_Os03g61430	missense_variant	MODERATE
qSNC3.32	Chr3	34857429	C	G	LOC_Os03g61430	missense_variant	MODERATE
qSNC3.32	Chr3	34857451	A	G	LOC_Os03g61430	missense_variant	MODERATE
qSNC3.32	Chr3	34857726	T	A	LOC_Os03g61430	missense_variant	MODERATE
qSNC3.32	Chr3	34857731	A	G	LOC_Os03g61430	missense_variant	MODERATE
qSNC3.32	Chr3	34857738	GGT	G	LOC_Os03g61430	frameshift_variant	HIGH
qSNC3.32	Chr3	34857751	G	A	LOC_Os03g61430	missense_variant	MODERATE
qSNC3.32	Chr3	34857764	C	T	LOC_Os03g61430	missense_variant	MODERATE
qSNC3.32	Chr3	34857776	A	G	LOC_Os03g61430	missense_variant	MODERATE
qSNC3.32	Chr3	34857808	C	A	LOC_Os03g61430	missense_variant	MODERATE
qSNC3.32	Chr3	34857851	G	A	LOC_Os03g61430	missense_variant	MODERATE
qSNC3.32	Chr3	34857853	G	A	LOC_Os03g61430	missense_variant	MODERATE
qSNC3.32	Chr3	34861011	T	G	LOC_Os03g61440	missense_variant	MODERATE
qSNC3.32	Chr3	34874025	G	C	LOC_Os03g61480	missense_variant	MODERATE
qSNC3.32	Chr3	34874164	G	C	LOC_Os03g61480	missense_variant	MODERATE
qSNC3.32	Chr3	34874248	A	T	LOC_Os03g61480	missense_variant	MODERATE
qSNC3.32	Chr3	34874460	G	T	LOC_Os03g61480	missense_variant	MODERATE
qSNC3.32	Chr3	34896747	T	G	LOC_Os03g61540	missense_variant	MODERATE
qSNC3.32	Chr3	34896850	G	C	LOC_Os03g61540	missense_variant	MODERATE
qSNC3.32	Chr3	34896909	G	A	LOC_Os03g61540	missense_variant	MODERATE
qSNC3.32	Chr3	34899086	A	G	LOC_Os03g61540	missense_variant	MODERATE
qSNC3.32	Chr3	34911894	G	T	LOC_Os03g61560	missense_variant	MODERATE
qSNC3.32	Chr3	34914122	T	C	LOC_Os03g61570	missense_variant	MODERATE
qSNC3.32	Chr3	34914140	G	GTTT	LOC_Os03g61570	disruptive_inframe_insertion	MODERATE
qSNC3.32	Chr3	34914169	G	A	LOC_Os03g61570	missense_variant	MODERATE
qSNC3.32	Chr3	34918762	C	T	LOC_Os03g61580	5_prime_UTR_premature_start_codon_gain_variant	LOW
qSNC3.32	Chr3	34918792	C	CCCGCCGCCG	LOC_Os03g61580	start_lost&conservative_inframe_insertion	HIGH
qSNC3.32	Chr3	34918887	C	CCAGCAGCAG	LOC_Os03g61580	disruptive_inframe_insertion	MODERATE
qSNC3.32	Chr3	34923418	T	G	LOC_Os03g61590	missense_variant	MODERATE
qSNC3.32	Chr3	34924754	T	C	LOC_Os03g61600	missense_variant	MODERATE
qSNC3.32	Chr3	34924901	A	G	LOC_Os03g61600	missense_variant	MODERATE
qSNC3.32	Chr3	34925726	C	T	LOC_Os03g61600	missense_variant	MODERATE
qSNC3.32	Chr3	34926438	C	G	LOC_Os03g61600	missense_variant	MODERATE
qSNC3.32	Chr3	34927567	G	A	LOC_Os03g61610	missense_variant	MODERATE
qSNC3.32	Chr3	34927578	A	G	LOC_Os03g61610	missense_variant	MODERATE
qSNC3.32	Chr3	34933557	T	C	LOC_Os03g61620	missense_variant	MODERATE
qSNC3.32	Chr3	34933658	T	C	LOC_Os03g61620	missense_variant	MODERATE
qSNC3.32	Chr3	34933913	G	A	LOC_Os03g61620	missense_variant	MODERATE
qSNC3.32	Chr3	34934046	A	G	LOC_Os03g61620	missense_variant	MODERATE
qSNC3.32	Chr3	34934505	C	T	LOC_Os03g61620	missense_variant	MODERATE
qSNC3.32	Chr3	34934522	G	A	LOC_Os03g61620	missense_variant	MODERATE
qSNC3.32	Chr3	34936500	A	G	LOC_Os03g61620	missense_variant	MODERATE
qSNC3.32	Chr3	34940224	A	C	LOC_Os03g61630	missense_variant	MODERATE
qSNC3.32	Chr3	34946129	T	G	LOC_Os03g61650	missense_variant	MODERATE
qSNC3.32	Chr3	34946275	C	G	LOC_Os03g61650	missense_variant	MODERATE
qSNC3.32	Chr3	34946640	G	A	LOC_Os03g61650	missense_variant	MODERATE
qSNC3.32	Chr3	34946646	G	A	LOC_Os03g61650	missense_variant	MODERATE
qSNC3.32	Chr3	34946920	CGCTGTG	C	LOC_Os03g61650	disruptive_inframe_deletion	MODERATE
qSNC3.32	Chr3	34953445	A	G	LOC_Os03g61670	splice_donor_variant&intron_variant	HIGH
qSNC3.32	Chr3	34954494	T	C	LOC_Os03g61670	missense_variant	MODERATE
qSNC3.32	Chr3	34954886	GCA	G	LOC_Os03g61670	splice_region_variant&intron_variant	LOW
qSNC3.32	Chr3	34955038	C	T	LOC_Os03g61670	missense_variant	MODERATE
qSNC3.32	Chr3	34957455	T	C	LOC_Os03g61680	missense_variant	MODERATE
qSNC3.32	Chr3	34961885	GT	G	LOC_Os03g61690	splice_region_variant&intron_variant	LOW
qSNC3.32	Chr3	34966227	A	C	LOC_Os03g61700	missense_variant	MODERATE
qSNC3.32	Chr3	34967527	T	C	LOC_Os03g61700	missense_variant	MODERATE
qSNC3.32	Chr3	34968018	C	T	LOC_Os03g61700	missense_variant	MODERATE
qSNC3.32	Chr3	34968164	C	G	LOC_Os03g61700	missense_variant	MODERATE
qSNC3.32	Chr3	34974889	A	G	LOC_Os03g61710	missense_variant	MODERATE
qSNC3.32	Chr3	34978657	A	G	LOC_Os03g61710	missense_variant	MODERATE
qSNC3.32	Chr3	34985255	A	G	LOC_Os03g61720	5_prime_UTR_premature_start_codon_gain_variant	LOW
qSNC3.32	Chr3	34992347	G	C	LOC_Os03g61730	missense_variant	MODERATE
qSNC3.32	Chr3	34993187	G	C	LOC_Os03g61730	missense_variant	MODERATE
qSNC3.32	Chr3	34993658	G	A	LOC_Os03g61730	missense_variant	MODERATE
qSNC3.32	Chr3	34995200	T	C	LOC_Os03g61730	missense_variant	MODERATE
qSNC3.32	Chr3	34995406	A	G	LOC_Os03g61730	missense_variant	MODERATE
qSNC3.32	Chr3	35002981	A	C	LOC_Os03g61740	missense_variant	MODERATE
qSNC3.32	Chr3	35008000	GA	G	LOC_Os03g61760	splice_region_variant	LOW
qSNC3.32	Chr3	35008679	G	A	LOC_Os03g61760	missense_variant	MODERATE
qSNC3.32	Chr3	35008689	T	G	LOC_Os03g61760	missense_variant	MODERATE
qSNC3.32	Chr3	35008839	T	C	LOC_Os03g61760	missense_variant	MODERATE
qSNC3.32	Chr3	35009281	T	C	LOC_Os03g61760	missense_variant	MODERATE
qSNC3.32	Chr3	35009418	G	A	LOC_Os03g61760	missense_variant	MODERATE
qSNC3.32	Chr3	35010071	G	A	LOC_Os03g61760	splice_region_variant&intron_variant	LOW
qSNC3.32	Chr3	35012814	T	C	LOC_Os03g61760	missense_variant	MODERATE
qSNC3.32	Chr3	35014755	C	T	LOC_Os03g61760	missense_variant	MODERATE
qSNC3.32	Chr3	35014850	G	A	LOC_Os03g61760	missense_variant	MODERATE
qSNC3.32	Chr3	35018689	TTTGCAAACACGGTTTCTAGGTTC	T	LOC_Os03g61770	frameshift_variant&splice_acceptor_variant&splice_region_variant&intron_variant	HIGH
qSNC3.32	Chr3	35020333	A	C	LOC_Os03g61770	missense_variant	MODERATE
qSNC3.32	Chr3	35020419	G	T	LOC_Os03g61770	missense_variant	MODERATE
qSNC3.32	Chr3	35020422	C	A	LOC_Os03g61770	stop_gained	HIGH
qSNC3.32	Chr3	35020451	G	A	LOC_Os03g61770	missense_variant	MODERATE
qSNC3.32	Chr3	35020486	ATGTCAGTGACAAAGTCACG	A	LOC_Os03g61770	frameshift_variant	HIGH
qSNC3.32	Chr3	35026045	C	G	LOC_Os03g61780	missense_variant	MODERATE
qSNC3.32	Chr3	35026625	G	A	LOC_Os03g61780	missense_variant	MODERATE
qSNC3.32	Chr3	35027475	C	A	LOC_Os03g61780	missense_variant	MODERATE
qSNC3.32	Chr3	35027585	A	AATT	LOC_Os03g61780	splice_region_variant&intron_variant	LOW
qSNC3.32	Chr3	35031645	C	A	LOC_Os03g61790	missense_variant	MODERATE
qSNC3.32	Chr3	35039175	C	T	LOC_Os03g61800	missense_variant&splice_region_variant	MODERATE
qSNC3.32	Chr3	35053972	G	A	LOC_Os03g61829	missense_variant	MODERATE
qSNC3.32	Chr3	35056794	G	T	LOC_Os03g61840	missense_variant	MODERATE
qSNC3.32	Chr3	35056844	C	T	LOC_Os03g61840	missense_variant	MODERATE
qSNC3.32	Chr3	35057347	A	AAAG	LOC_Os03g61840	disruptive_inframe_insertion	MODERATE
qSNC3.32	Chr3	35058447	A	G	LOC_Os03g61840	missense_variant	MODERATE
qSNC3.32	Chr3	35084910	T	G	LOC_Os03g61890	missense_variant	MODERATE
qSNC3.32	Chr3	35085022	C	T	LOC_Os03g61890	missense_variant	MODERATE
qSNC3.32	Chr3	35085591	G	A	LOC_Os03g61890	missense_variant	MODERATE
qSNC3.32	Chr3	35086054	A	G	LOC_Os03g61890	missense_variant	MODERATE
qSNC3.32	Chr3	35086274	T	G	LOC_Os03g61890	missense_variant	MODERATE
qSNC3.32	Chr3	35086435	A	G	LOC_Os03g61890	missense_variant	MODERATE
qSNC3.32	Chr3	35086675	G	A	LOC_Os03g61890	missense_variant	MODERATE
qSNC3.32	Chr3	35087983	C	G	LOC_Os03g61890	missense_variant	MODERATE
qSNC3.32	Chr3	35100176	A	G	LOC_Os03g61920	5_prime_UTR_premature_start_codon_gain_variant	LOW
qSNC3.32	Chr3	35105434	T	A	LOC_Os03g61930	missense_variant	MODERATE
qSNC3.32	Chr3	35110676	A	G	LOC_Os03g61930	splice_region_variant&intron_variant	LOW
qSNC3.32	Chr3	35112204	A	G	LOC_Os03g61930	missense_variant	MODERATE
qSNC3.32	Chr3	35113812	C	CA	LOC_Os03g61940	frameshift_variant	HIGH
qSNC3.32	Chr3	35113814	C	CCTA	LOC_Os03g61940	stop_gained&conservative_inframe_insertion	HIGH
qSNC3.32	Chr3	35113889	G	T	LOC_Os03g61940	missense_variant	MODERATE
qSNC3.32	Chr3	35113984	C	T	LOC_Os03g61940	missense_variant	MODERATE
qSNC3.32	Chr3	35113991	C	A	LOC_Os03g61940	missense_variant	MODERATE
qSNC3.32	Chr3	35114105	GC	G	LOC_Os03g61940	frameshift_variant	HIGH
qSNC3.32	Chr3	35114140	G	A	LOC_Os03g61940	missense_variant	MODERATE
qSNC3.32	Chr3	35114296	A	G	LOC_Os03g61940	missense_variant	MODERATE
qSNC3.32	Chr3	35115429	T	C	LOC_Os03g61950	5_prime_UTR_premature_start_codon_gain_variant	LOW
qSNC3.32	Chr3	35132739	A	G	LOC_Os03g61980	missense_variant	MODERATE
qSNC3.32	Chr3	35132920	G	C	LOC_Os03g61980	missense_variant&splice_region_variant	MODERATE
qSNC3.32	Chr3	35134380	G	C	LOC_Os03g61980	missense_variant	MODERATE
qSNC3.32	Chr3	35134428	T	A	LOC_Os03g61980	missense_variant	MODERATE
qSNC3.32	Chr3	35135469	A	ACCG	LOC_Os03g61990	disruptive_inframe_insertion	MODERATE
qSNC3.32	Chr3	35140545	C	T	LOC_Os03g62010	missense_variant	MODERATE
qSNC3.32	Chr3	35145712	A	T	LOC_Os03g62020	5_prime_UTR_premature_start_codon_gain_variant	LOW
qSNC3.32	Chr3	35145732	C	A	LOC_Os03g62020	5_prime_UTR_premature_start_codon_gain_variant	LOW
qSNC3.32	Chr3	35146385	G	C	LOC_Os03g62020	missense_variant	MODERATE
qSNC3.32	Chr3	35147694	C	T	LOC_Os03g62030	missense_variant	MODERATE
qSNC3.32	Chr3	35156504	T	A	LOC_Os03g62050	missense_variant	MODERATE
qSNC3.32	Chr3	35156609	A	C	LOC_Os03g62050	missense_variant	MODERATE
qSNC3.32	Chr3	35157113	G	C	LOC_Os03g62050	missense_variant	MODERATE
qSNC3.32	Chr3	35157261	T	C	LOC_Os03g62050	missense_variant	MODERATE
qSNC3.32	Chr3	35161617	C	T	LOC_Os03g62060	splice_region_variant&intron_variant	LOW
qSNC3.32	Chr3	35162673	G	A	LOC_Os03g62060	missense_variant	MODERATE
qSNC3.32	Chr3	35166744	C	A	LOC_Os03g62070	missense_variant	MODERATE
qSNC3.32	Chr3	35167884	T	TG	LOC_Os03g62070	frameshift_variant	HIGH
qSNC3.32	Chr3	35168246	TG	T	LOC_Os03g62070	frameshift_variant	HIGH
qSNC3.32	Chr3	35168351	C	CG	LOC_Os03g62070	frameshift_variant	HIGH
qSNC3.32	Chr3	35168352	A	ACG	LOC_Os03g62070	frameshift_variant	HIGH
qSNC3.32	Chr3	35169446	T	G	LOC_Os03g62080	missense_variant	MODERATE
qSNC3.32	Chr3	35169678	C	A	LOC_Os03g62080	missense_variant	MODERATE
qSNC3.32	Chr3	35169705	G	A	LOC_Os03g62080	missense_variant	MODERATE
qSNC3.32	Chr3	35169849	C	T	LOC_Os03g62080	missense_variant	MODERATE
qSNC3.32	Chr3	35170243	A	C	LOC_Os03g62080	missense_variant	MODERATE
qSNC3.32	Chr3	35179487	G	A	LOC_Os03g62090	missense_variant	MODERATE
qSNC3.32	Chr3	35181283	A	G	LOC_Os03g62090	splice_region_variant&intron_variant	LOW
qSNC3.32	Chr3	35212940	T	G	LOC_Os03g62170	missense_variant	MODERATE
qSNC3.32	Chr3	35289002	C	T	LOC_Os03g62290	missense_variant	MODERATE
qSNC3.32	Chr3	35289005	C	T	LOC_Os03g62290	missense_variant	MODERATE
qSNC3.32	Chr3	35289096	G	A	LOC_Os03g62290	missense_variant	MODERATE
qSNC3.32	Chr3	35289111	A	G	LOC_Os03g62290	missense_variant	MODERATE
qSNC3.32	Chr3	35296745	ATG	A	LOC_Os03g62300	frameshift_variant&splice_donor_variant&splice_region_variant&intron_variant	HIGH
qSNC3.32	Chr3	35296750	A	T	LOC_Os03g62300	splice_region_variant&intron_variant	LOW
qSNC3.32	Chr3	35297126	A	C	LOC_Os03g62300	missense_variant	MODERATE
qSNC3.32	Chr3	35297132	A	G	LOC_Os03g62300	missense_variant	MODERATE
qSNC3.32	Chr3	35299422	G	T	LOC_Os03g62300	missense_variant	MODERATE
qSNC3.32	Chr3	35310482	C	T	LOC_Os03g62330	missense_variant	MODERATE
qSNC3.32	Chr3	35315175	C	T	LOC_Os03g62340	missense_variant	MODERATE
qSNC3.32	Chr3	35315295	T	A	LOC_Os03g62340	missense_variant	MODERATE
qSNC3.32	Chr3	35315643	C	T	LOC_Os03g62340	missense_variant	MODERATE
qSNC3.32	Chr3	35315691	G	A	LOC_Os03g62340	missense_variant	MODERATE
qSNC3.32	Chr3	35316802	T	C	LOC_Os03g62340	missense_variant	MODERATE
qSNC3.32	Chr3	35317075	C	T	LOC_Os03g62340	missense_variant	MODERATE
qSNC3.32	Chr3	35332205	G	C	LOC_Os03g62370	missense_variant	MODERATE
qSNC3.32	Chr3	35332325	GC	G	LOC_Os03g62370	frameshift_variant	HIGH
qSNC3.32	Chr3	35332328	GCC	G	LOC_Os03g62370	frameshift_variant	HIGH
qSNC3.32	Chr3	35332514	A	C	LOC_Os03g62370	missense_variant	MODERATE
qSNC3.32	Chr3	35332544	G	A	LOC_Os03g62370	missense_variant	MODERATE
qSNC3.32	Chr3	35333111	A	G	LOC_Os03g62370	missense_variant	MODERATE
qSNC3.32	Chr3	35333112	G	A	LOC_Os03g62370	missense_variant	MODERATE
qSNC3.32	Chr3	35333387	T	C	LOC_Os03g62370	missense_variant	MODERATE
qSNC3.32	Chr3	35333461	A	T	LOC_Os03g62370	missense_variant	MODERATE
qSNC3.32	Chr3	35333468	G	A	LOC_Os03g62370	missense_variant	MODERATE
qSNC3.32	Chr3	35333505	C	G	LOC_Os03g62370	missense_variant	MODERATE
qSNC3.32	Chr3	35333906	A	G	LOC_Os03g62370	missense_variant	MODERATE
qSNC3.32	Chr3	35334091	C	G	LOC_Os03g62370	missense_variant	MODERATE
qSNC3.32	Chr3	35334198	A	T	LOC_Os03g62370	missense_variant	MODERATE
qSNC3.32	Chr3	35337046	C	T	LOC_Os03g62379	missense_variant	MODERATE
qSNC3.32	Chr3	35337067	G	C	LOC_Os03g62379	missense_variant	MODERATE
qSNC3.32	Chr3	35337086	C	T	LOC_Os03g62379	missense_variant	MODERATE
qSNC3.32	Chr3	35337103	A	G	LOC_Os03g62379	start_lost	HIGH
qSNC3.32	Chr3	35338053	A	G	LOC_Os03g62388	splice_region_variant&intron_variant	LOW
qSNC3.32	Chr3	35338286	G	A	LOC_Os03g62388	missense_variant	MODERATE
qSNC3.32	Chr3	35338317	C	T	LOC_Os03g62388	missense_variant	MODERATE
qSNC3.32	Chr3	35338326	C	T	LOC_Os03g62388	missense_variant	MODERATE
qSNC3.32	Chr3	35338581	T	C	LOC_Os03g62388	missense_variant	MODERATE
qSNC3.32	Chr3	35338595	T	A	LOC_Os03g62388	missense_variant	MODERATE
qSNC3.32	Chr3	35338602	A	G	LOC_Os03g62388	missense_variant	MODERATE
qSNC3.32	Chr3	35338619	G	A	LOC_Os03g62388	missense_variant	MODERATE
qSNC3.32	Chr3	35338939	A	G	LOC_Os03g62388	missense_variant	MODERATE
qSNC3.32	Chr3	35338958	C	T	LOC_Os03g62388	missense_variant	MODERATE
qSNC3.32	Chr3	35338994	C	T	LOC_Os03g62388	missense_variant	MODERATE
qSNC3.32	Chr3	35339050	C	T	LOC_Os03g62388	missense_variant	MODERATE
qSNC3.32	Chr3	35339334	A	G	LOC_Os03g62388	missense_variant	MODERATE
qSNC3.32	Chr3	35339340	T	C	LOC_Os03g62388	missense_variant	MODERATE
qSNC3.32	Chr3	35339391	G	A	LOC_Os03g62388	missense_variant	MODERATE
qSNC3.32	Chr3	35339409	T	G	LOC_Os03g62388	missense_variant	MODERATE
qSNC3.32	Chr3	35339510	T	C	LOC_Os03g62388	splice_region_variant&intron_variant	LOW
qSNC3.32	Chr3	35339575	T	C	LOC_Os03g62388	missense_variant	MODERATE
qSNC3.32	Chr3	35339632	A	G	LOC_Os03g62388	missense_variant	MODERATE
qSNC3.32	Chr3	35339843	T	C	LOC_Os03g62388	missense_variant	MODERATE
qSNC3.32	Chr3	35339933	G	C	LOC_Os03g62388	missense_variant	MODERATE
qSNC3.32	Chr3	35339987	C	T	LOC_Os03g62388	missense_variant	MODERATE
qSNC3.32	Chr3	35340097	C	T	LOC_Os03g62388	missense_variant	MODERATE
qSNC3.32	Chr3	35340145	T	C	LOC_Os03g62388	missense_variant	MODERATE
qSNC3.32	Chr3	35340173	C	A	LOC_Os03g62388	missense_variant	MODERATE
qSNC3.32	Chr3	35340211	G	A	LOC_Os03g62388	missense_variant	MODERATE
qSNC3.32	Chr3	35340341	T	C	LOC_Os03g62388	missense_variant	MODERATE
qSNC3.32	Chr3	35340346	C	T	LOC_Os03g62388	missense_variant	MODERATE
qSNC3.32	Chr3	35340393	T	A	LOC_Os03g62388	missense_variant	MODERATE
qSNC3.32	Chr3	35345212	T	TAAAGCA	LOC_Os03g62400	disruptive_inframe_insertion	MODERATE
qSNC3.32	Chr3	35346307	C	G	LOC_Os03g62400	missense_variant	MODERATE
qSNC3.32	Chr3	35346554	T	A	LOC_Os03g62400	missense_variant	MODERATE
qSNC3.32	Chr3	35347520	C	G	LOC_Os03g62400	missense_variant	MODERATE
qSNC3.32	Chr3	35347550	G	A	LOC_Os03g62400	missense_variant	MODERATE
qSNC3.32	Chr3	35347565	C	A	LOC_Os03g62400	missense_variant	MODERATE
qSNC3.32	Chr3	35347703	T	A	LOC_Os03g62400	missense_variant	MODERATE
qSNC3.32	Chr3	35347766	G	A	LOC_Os03g62400	missense_variant	MODERATE
qSNC3.32	Chr3	35347880	C	T	LOC_Os03g62400	missense_variant	MODERATE
qSNC3.32	Chr3	35347989	C	G	LOC_Os03g62400	missense_variant	MODERATE
qSNC3.32	Chr3	35348023	A	T	LOC_Os03g62400	stop_gained	HIGH
qSNC3.32	Chr3	35348024	C	G	LOC_Os03g62400	missense_variant	MODERATE
qSNC3.32	Chr3	35348075	C	G	LOC_Os03g62400	missense_variant	MODERATE
qSNC3.32	Chr3	35348216	G	A	LOC_Os03g62400	missense_variant	MODERATE
qSNC3.32	Chr3	35348424	T	C	LOC_Os03g62400	missense_variant	MODERATE
qSNC3.32	Chr3	35348606	C	T	LOC_Os03g62400	missense_variant	MODERATE
qSNC3.32	Chr3	35348748	C	T	LOC_Os03g62400	missense_variant	MODERATE
qSNC3.32	Chr3	35348757	C	T	LOC_Os03g62400	missense_variant	MODERATE
qSNC3.32	Chr3	35348762	A	T	LOC_Os03g62400	missense_variant	MODERATE
qSNC3.32	Chr3	35348831	T	C	LOC_Os03g62400	missense_variant	MODERATE
qSNC3.32	Chr3	35348832	C	T	LOC_Os03g62400	missense_variant	MODERATE
qSNC3.32	Chr3	35348858	C	G	LOC_Os03g62400	missense_variant	MODERATE
qSNC3.32	Chr3	35348859	A	G	LOC_Os03g62400	missense_variant	MODERATE
qSNC3.32	Chr3	35350267	T	C	LOC_Os03g62410	missense_variant	MODERATE
qSNC3.32	Chr3	35350336	A	C	LOC_Os03g62410	missense_variant	MODERATE
qSNC3.32	Chr3	35350992	C	T	LOC_Os03g62410	missense_variant	MODERATE
qSNC3.32	Chr3	35351279	GCTGTA	G	LOC_Os03g62410	splice_region_variant&intron_variant	LOW
qSNC3.32	Chr3	35351415	T	C	LOC_Os03g62410	missense_variant	MODERATE
qSNC3.32	Chr3	35353917	C	T	LOC_Os03g62410	missense_variant	MODERATE
qSNC3.32	Chr3	35354574	C	A	LOC_Os03g62410	missense_variant	MODERATE
qSNC3.32	Chr3	35354580	G	C	LOC_Os03g62410	missense_variant	MODERATE
qSNC3.32	Chr3	35354601	GTGCCGC	G	LOC_Os03g62410	disruptive_inframe_deletion	MODERATE
qSNC3.32	Chr3	35360734	G	GA	LOC_Os03g62430	splice_region_variant	LOW
qSNC3.32	Chr3	35360952	G	T	LOC_Os03g62430	missense_variant	MODERATE
qSNC3.32	Chr3	35360991	G	T	LOC_Os03g62430	missense_variant	MODERATE
qSNC3.32	Chr3	35361109	T	A	LOC_Os03g62430	missense_variant	MODERATE
qSNC3.32	Chr3	35361176	C	A	LOC_Os03g62430	missense_variant	MODERATE
qSNC3.32	Chr3	35361180	T	C	LOC_Os03g62430	missense_variant	MODERATE
qSNC3.32	Chr3	35361192	C	G	LOC_Os03g62430	missense_variant	MODERATE
qSNC3.32	Chr3	35361194	A	T	LOC_Os03g62430	missense_variant	MODERATE
qSNC3.32	Chr3	35361496	T	C	LOC_Os03g62430	missense_variant	MODERATE
qSNC3.32	Chr3	35361811	G	T	LOC_Os03g62430	missense_variant	MODERATE
qSNC3.32	Chr3	35361910	G	A	LOC_Os03g62430	missense_variant	MODERATE
qSNC3.32	Chr3	35362146	G	A	LOC_Os03g62430	splice_region_variant&intron_variant	LOW
qSNC3.32	Chr3	35362252	C	T	LOC_Os03g62430	splice_region_variant&synonymous_variant	LOW
qSNC3.32	Chr3	35362328	C	A	LOC_Os03g62430	missense_variant	MODERATE
qSNC3.32	Chr3	35363415	T	C	LOC_Os03g62430	missense_variant	MODERATE
qSNC3.32	Chr3	35363505	T	C	LOC_Os03g62430	missense_variant	MODERATE
qSNC3.32	Chr3	35363873	A	T	LOC_Os03g62430	missense_variant	MODERATE
qSNC3.32	Chr3	35363883	C	T	LOC_Os03g62430	missense_variant	MODERATE
qSNC3.32	Chr3	35364074	G	C	LOC_Os03g62430	missense_variant	MODERATE
qSNC3.32	Chr3	35364182	A	AT	LOC_Os03g62430	frameshift_variant	HIGH
qSNC3.32	Chr3	35364206	G	A	LOC_Os03g62430	missense_variant	MODERATE
qSNC3.32	Chr3	35364457	T	TA	LOC_Os03g62430	splice_acceptor_variant&intron_variant	HIGH
qSNC3.32	Chr3	35365851	T	C	LOC_Os03g62440	missense_variant	MODERATE
qSNC3.32	Chr3	35365913	C	G	LOC_Os03g62440	missense_variant	MODERATE
qSNC3.32	Chr3	35365928	A	G	LOC_Os03g62440	missense_variant	MODERATE
qSNC3.32	Chr3	35365930	C	A	LOC_Os03g62440	missense_variant	MODERATE
qSNC3.32	Chr3	35365934	G	A	LOC_Os03g62440	missense_variant	MODERATE
qSNC3.32	Chr3	35365968	A	T	LOC_Os03g62440	missense_variant	MODERATE
qSNC3.32	Chr3	35366048	G	A	LOC_Os03g62440	missense_variant	MODERATE
qSNC3.32	Chr3	35366069	A	G	LOC_Os03g62440	missense_variant	MODERATE
qSNC3.32	Chr3	35366078	GAT	G	LOC_Os03g62440	frameshift_variant	HIGH
qSNC3.32	Chr3	35366081	GA	G	LOC_Os03g62440	frameshift_variant	HIGH
qSNC3.32	Chr3	35366156	A	G	LOC_Os03g62440	missense_variant	MODERATE
qSNC3.32	Chr3	35366276	G	A	LOC_Os03g62440	missense_variant	MODERATE
qSNC3.32	Chr3	35378222	G	T	LOC_Os03g62470	missense_variant	MODERATE
qSNC3.32	Chr3	35378227	C	T	LOC_Os03g62470	missense_variant	MODERATE
qSNC3.32	Chr3	35378275	T	C	LOC_Os03g62470	missense_variant	MODERATE
qSNC3.32	Chr3	35378284	C	T	LOC_Os03g62470	missense_variant	MODERATE
qSNC3.32	Chr3	35378362	T	C	LOC_Os03g62470	missense_variant	MODERATE
qSNC3.32	Chr3	35380643	C	G	LOC_Os03g62480	missense_variant	MODERATE
qSNC3.32	Chr3	35381110	T	C	LOC_Os03g62480	missense_variant	MODERATE
qSNC3.32	Chr3	35381450	C	T	LOC_Os03g62480	missense_variant	MODERATE
qSNC3.32	Chr3	35387952	G	T	LOC_Os03g62500	missense_variant	MODERATE
qSNC3.32	Chr3	35395556	G	A	LOC_Os03g62510	missense_variant	MODERATE
qSNC3.32	Chr3	35397824	T	A	LOC_Os03g62510	missense_variant&splice_region_variant	MODERATE
qSNC3.32	Chr3	35403864	T	A	LOC_Os03g62522	missense_variant	MODERATE
qSNC3.32	Chr3	35404588	A	G	LOC_Os03g62522	missense_variant	MODERATE
qSNC3.32	Chr3	35404611	T	C	LOC_Os03g62522	missense_variant	MODERATE
qSNC3.32	Chr3	35405274	G	GAATT	LOC_Os03g62522	frameshift_variant	HIGH
qSNC3.32	Chr3	35405298	G	A	LOC_Os03g62522	missense_variant	MODERATE
qSNC3.32	Chr3	35412222	T	C	LOC_Os03g62539	missense_variant	MODERATE
qSNC3.32	Chr3	35427092	A	T	LOC_Os03g62580	missense_variant	MODERATE
qSNC3.32	Chr3	35428588	T	C	LOC_Os03g62590	splice_region_variant	LOW
qSNC3.32	Chr3	35428968	G	T	LOC_Os03g62590	missense_variant	MODERATE
qSNC3.32	Chr3	35429082	C	T	LOC_Os03g62590	missense_variant	MODERATE
qSNC3.32	Chr3	35429517	A	C	LOC_Os03g62590	missense_variant	MODERATE
qSNC3.32	Chr3	35437885	T	G	LOC_Os03g62610	missense_variant	MODERATE
qSNC3.32	Chr3	35442790	G	C	LOC_Os03g62620	missense_variant	MODERATE
qSNC3.32	Chr3	35443273	A	G	LOC_Os03g62620	splice_region_variant	LOW
qSNC3.32	Chr3	35446361	T	TGAAGA	LOC_Os03g62630	splice_region_variant	LOW
qSNC3.32	Chr3	35446968	C	T	LOC_Os03g62640	missense_variant	MODERATE
qSNC3.32	Chr3	35448053	T	G	LOC_Os03g62640	stop_lost	HIGH
qSNC3.32	Chr3	35448088	A	T	LOC_Os03g62640	missense_variant	MODERATE
qSNC3.32	Chr3	35449218	G	A	LOC_Os03g62640	missense_variant	MODERATE
qSNC3.32	Chr3	35451778	C	T	LOC_Os03g62640	splice_region_variant&intron_variant	LOW
qSNC3.32	Chr3	35453675	C	G	LOC_Os03g62650	missense_variant	MODERATE
qSNC3.32	Chr3	35453693	A	T	LOC_Os03g62650	missense_variant	MODERATE
qSNC3.32	Chr3	35458475	G	A	LOC_Os03g62650	missense_variant&splice_region_variant	MODERATE
qSNC3.32	Chr3	35462386	G	A	LOC_Os03g62660	missense_variant	MODERATE
qSNC3.32	Chr3	35468290	TCGG	T	LOC_Os03g62670	disruptive_inframe_deletion	MODERATE
qSNC3.32	Chr3	35468315	A	G	LOC_Os03g62670	missense_variant	MODERATE
qSNC3.32	Chr3	35474211	A	G	LOC_Os03g62690	missense_variant	MODERATE
qSNC3.32	Chr3	35474358	A	G	LOC_Os03g62690	missense_variant	MODERATE
qSNC3.32	Chr3	35475617	A	G	LOC_Os03g62690	missense_variant	MODERATE
qSNC3.32	Chr3	35476769	T	C	LOC_Os03g62690	missense_variant	MODERATE
qSNC3.32	Chr3	35477247	A	G	LOC_Os03g62690	missense_variant	MODERATE
qSNC3.32	Chr3	35478085	A	C	LOC_Os03g62690	missense_variant	MODERATE
qSNC3.32	Chr3	35478281	T	G	LOC_Os03g62690	missense_variant	MODERATE
qSNC3.32	Chr3	35478315	A	G	LOC_Os03g62690	missense_variant	MODERATE
qSNC3.32	Chr3	35478906	C	T	LOC_Os03g62690	splice_region_variant&intron_variant	LOW
qSNC3.32	Chr3	35479408	A	G	LOC_Os03g62690	missense_variant&splice_region_variant	MODERATE
qSNC3.32	Chr3	35497210	G	A	LOC_Os03g62720	missense_variant	MODERATE
qSNK8.01	Chr8	261276	A	C	LOC_Os08g01400	5_prime_UTR_premature_start_codon_gain_variant	LOW
qSNK8.01	Chr8	274129	G	T	LOC_Os08g01420	missense_variant	MODERATE
qSNK8.01	Chr8	274460	G	C	LOC_Os08g01420	missense_variant	MODERATE
qSNK8.01	Chr8	276145	G	A	LOC_Os08g01420	missense_variant	MODERATE
qSNK8.01	Chr8	276315	G	A	LOC_Os08g01420	missense_variant	MODERATE
qSNK8.01	Chr8	276669	G	A	LOC_Os08g01420	missense_variant	MODERATE
qSNK8.01	Chr8	279880	A	C	LOC_Os08g01430	missense_variant	MODERATE
qSNK8.01	Chr8	280409	G	C	LOC_Os08g01430	missense_variant	MODERATE
qSNK8.01	Chr8	280455	C	T	LOC_Os08g01430	missense_variant	MODERATE
qSNK8.01	Chr8	280893	A	A	LOC_Os08g01430	missense_variant	MODERATE
qSNK8.01	Chr8	280895	C	C	LOC_Os08g01430	missense_variant	MODERATE
qSNK8.01	Chr8	280901	G	G	LOC_Os08g01430	missense_variant	MODERATE
qSNK8.01	Chr8	280985	G	A	LOC_Os08g01430	missense_variant	MODERATE
qSNK8.01	Chr8	281037	T	C	LOC_Os08g01430	missense_variant	MODERATE
qSNK8.01	Chr8	283268	G	A	LOC_Os08g01440	missense_variant	MODERATE
qSNK8.01	Chr8	284048	T	T	LOC_Os08g01440	missense_variant	MODERATE
qSNK8.01	Chr8	284077	G	A	LOC_Os08g01440	missense_variant	MODERATE
qSNK8.01	Chr8	288891	T	C	LOC_Os08g01450	missense_variant	MODERATE
qSNK8.01	Chr8	289042	C	T	LOC_Os08g01450	missense_variant	MODERATE
qSNK8.01	Chr8	289260	T	C	LOC_Os08g01450	missense_variant	MODERATE
qSNK8.01	Chr8	291338	A	G	LOC_Os08g01460	missense_variant	MODERATE
qSNK8.01	Chr8	291344	T	C	LOC_Os08g01460	missense_variant	MODERATE
qSNK8.01	Chr8	291427	A	G	LOC_Os08g01460	missense_variant	MODERATE
qSNK8.01	Chr8	291550	G	A	LOC_Os08g01460	missense_variant	MODERATE
qSNK8.01	Chr8	291843	G	T	LOC_Os08g01460	missense_variant	MODERATE
qSNK8.01	Chr8	291870	A	G	LOC_Os08g01460	missense_variant	MODERATE
qSNK8.01	Chr8	291971	T	TGA	LOC_Os08g01460	frameshift_variant	HIGH
qSNK8.01	Chr8	291983	T	A	LOC_Os08g01460	missense_variant	MODERATE
qSNK8.01	Chr8	292003	A	T	LOC_Os08g01460	missense_variant	MODERATE
qSNK8.01	Chr8	292041	T	C	LOC_Os08g01460	missense_variant	MODERATE
qSNK8.01	Chr8	293465	G	T	LOC_Os08g01470	stop_gained	HIGH
qSNK8.01	Chr8	293568	T	A	LOC_Os08g01470	missense_variant	MODERATE
qSNK8.01	Chr8	293717	A	G	LOC_Os08g01470	missense_variant	MODERATE
qSNK8.01	Chr8	293919	A	G	LOC_Os08g01470	splice_region_variant&intron_variant	LOW
qSNK8.01	Chr8	294339	A	T	LOC_Os08g01470	missense_variant	MODERATE
qSNK8.01	Chr8	294367	T	C	LOC_Os08g01470	missense_variant	MODERATE
qSNK8.01	Chr8	294369	T	C	LOC_Os08g01470	missense_variant	MODERATE
qSNK8.01	Chr8	294384	C	T	LOC_Os08g01470	missense_variant	MODERATE
qSNK8.01	Chr8	294390	C	T	LOC_Os08g01470	missense_variant	MODERATE
qSNK8.01	Chr8	294471	G	A	LOC_Os08g01470	missense_variant	MODERATE
qSNK8.01	Chr8	294544	C	A	LOC_Os08g01470	splice_acceptor_variant&intron_variant	HIGH
qSNK8.01	Chr8	294682	A	AGGACCATGCTTG	LOC_Os08g01470	disruptive_inframe_insertion	MODERATE
qSNK8.01	Chr8	294716	A	G	LOC_Os08g01470	missense_variant	MODERATE
qSNK8.01	Chr8	294783	T	A	LOC_Os08g01470	missense_variant	MODERATE
qSNK8.01	Chr8	297404	C	T	LOC_Os08g01480	missense_variant	MODERATE
qSNK8.01	Chr8	297557	C	T	LOC_Os08g01480	missense_variant	MODERATE
qSNK8.01	Chr8	297604	T	C	LOC_Os08g01480	missense_variant	MODERATE
qSNK8.01	Chr8	302298	T	C	LOC_Os08g01490	missense_variant	MODERATE
qSNK8.01	Chr8	302491	G	T	LOC_Os08g01490	missense_variant	MODERATE
qSNK8.01	Chr8	303477	C	G	LOC_Os08g01490	missense_variant	MODERATE
qSNK8.01	Chr8	308328	A	C	LOC_Os08g01510	initiator_codon_variant	LOW
qSNK8.01	Chr8	309451	G	A	LOC_Os08g01510	missense_variant	MODERATE
qSNK8.01	Chr8	318091	C	T	LOC_Os08g01514	missense_variant	MODERATE
qSNK8.01	Chr8	318097	G	A	LOC_Os08g01514	stop_gained	HIGH
qSNK8.01	Chr8	318139	C	T	LOC_Os08g01514	missense_variant	MODERATE
qSNK8.01	Chr8	320385	G	A	LOC_Os08g01520	splice_region_variant&intron_variant	LOW
qSNK8.01	Chr8	320860	C	A	LOC_Os08g01520	missense_variant	MODERATE
qSNK8.01	Chr8	332092	GCGATGAACCCCCTACT	G	LOC_Os08g01560	frameshift_variant&start_lost	HIGH
qSNK8.01	Chr8	332120	C	G	LOC_Os08g01560	missense_variant	MODERATE
qSNK8.01	Chr8	332260	AGATGGTCTCC	A	LOC_Os08g01560	frameshift_variant	HIGH
qSNK8.01	Chr8	332300	GCACCGCGCAGTAT	G	LOC_Os08g01560	frameshift_variant	HIGH
qSNK8.01	Chr8	332339	T	C	LOC_Os08g01560	missense_variant	MODERATE
qSNK8.01	Chr8	342361	GGATGATGAT	G	LOC_Os08g01580	disruptive_inframe_deletion	MODERATE
qSNK8.01	Chr8	342834	C	T	LOC_Os08g01580	missense_variant	MODERATE
qSNK8.01	Chr8	342845	T	C	LOC_Os08g01580	missense_variant	MODERATE
qSNK8.01	Chr8	342972	C	T	LOC_Os08g01580	missense_variant	MODERATE
qSNK8.01	Chr8	344770	G	A	LOC_Os08g01580	stop_gained	HIGH
qSNK8.01	Chr8	344773	T	A	LOC_Os08g01580	missense_variant	MODERATE
qSNK8.01	Chr8	344884	A	G	LOC_Os08g01580	missense_variant	MODERATE
qSNK8.01	Chr8	345068	A	C	LOC_Os08g01580	missense_variant	MODERATE
qSNK8.01	Chr8	345102	C	T	LOC_Os08g01580	missense_variant	MODERATE
qSNK8.01	Chr8	345585	A	G	LOC_Os08g01580	missense_variant	MODERATE
qSNK8.01	Chr8	345906	G	A	LOC_Os08g01580	missense_variant	MODERATE
qSNK8.01	Chr8	345996	T	G	LOC_Os08g01580	missense_variant	MODERATE
qSNK8.01	Chr8	346179	G	T	LOC_Os08g01580	missense_variant	MODERATE
qSNK8.01	Chr8	346197	C	G	LOC_Os08g01580	missense_variant	MODERATE
qSNK8.01	Chr8	346243	A	G	LOC_Os08g01580	missense_variant	MODERATE
qSNK8.01	Chr8	346272	C	G	LOC_Os08g01580	missense_variant	MODERATE
qSNK8.01	Chr8	346273	G	T	LOC_Os08g01580	missense_variant	MODERATE
qSNK8.01	Chr8	352831	C	T	LOC_Os08g01590	missense_variant	MODERATE
qSNK8.01	Chr8	353320	G	G	LOC_Os08g01590	missense_variant	MODERATE
qSNK8.01	Chr8	353338	G	G	LOC_Os08g01590	missense_variant	MODERATE
qSNK8.01	Chr8	357158	G	A	LOC_Os08g01600	missense_variant	MODERATE
qSNK8.01	Chr8	357214	G	G	LOC_Os08g01600	missense_variant	MODERATE
qSNK8.01	Chr8	357230	C	C	LOC_Os08g01600	missense_variant	MODERATE
qSNK8.01	Chr8	357239	C	C	LOC_Os08g01600	missense_variant	MODERATE
qSNK8.01	Chr8	357256	G	G	LOC_Os08g01600	missense_variant	MODERATE
qSNK8.01	Chr8	357283	GGGGACA	GGGGACA	LOC_Os08g01600	disruptive_inframe_deletion	MODERATE
qSNK8.01	Chr8	357346	G	G	LOC_Os08g01600	disruptive_inframe_insertion	MODERATE
qSNK8.01	Chr8	357350	C	C	LOC_Os08g01600	missense_variant	MODERATE
qSNK8.01	Chr8	357386	G	G	LOC_Os08g01600	missense_variant	MODERATE
qSNK8.01	Chr8	357401	C	C	LOC_Os08g01600	missense_variant	MODERATE
qSNK8.01	Chr8	359063	G	T	LOC_Os08g01600	splice_region_variant&synonymous_variant	LOW
qSNK8.01	Chr8	362095	A	T	LOC_Os08g01610	missense_variant	MODERATE
qSNK8.01	Chr8	371706	T	C	LOC_Os08g01630	missense_variant	MODERATE
qSNK8.01	Chr8	373023	A	G	LOC_Os08g01630	missense_variant	MODERATE
qSNK8.01	Chr8	373110	G	C	LOC_Os08g01630	missense_variant	MODERATE
qSNK8.01	Chr8	373183	C	T	LOC_Os08g01630	missense_variant	MODERATE
qSNK8.01	Chr8	374325	A	A	LOC_Os08g01640	frameshift_variant	HIGH
qSNK8.01	Chr8	374326	TTC	TTC	LOC_Os08g01640	frameshift_variant	HIGH
qSNK8.01	Chr8	374622	A	A	LOC_Os08g01640	missense_variant	MODERATE
qSNK8.01	Chr8	374726	C	G	LOC_Os08g01640	missense_variant	MODERATE
qSNK8.01	Chr8	375156	T	G	LOC_Os08g01640	missense_variant	MODERATE
qSNK8.01	Chr8	375433	T	C	LOC_Os08g01640	missense_variant	MODERATE
qSNK8.01	Chr8	375729	A	G	LOC_Os08g01640	missense_variant	MODERATE
qSNK8.01	Chr8	376412	A	C	LOC_Os08g01640	missense_variant	MODERATE
qSNK8.01	Chr8	376480	T	C	LOC_Os08g01640	missense_variant	MODERATE
qSNK8.01	Chr8	376580	A	C	LOC_Os08g01640	5_prime_UTR_premature_start_codon_gain_variant	LOW
qSNK8.01	Chr8	376581	A	G	LOC_Os08g01640	5_prime_UTR_premature_start_codon_gain_variant	LOW
qSNK8.01	Chr8	382249	C	A	LOC_Os08g01650	missense_variant	MODERATE
qSNK8.01	Chr8	382447	G	A	LOC_Os08g01650	missense_variant	MODERATE
qSNK8.01	Chr8	383052	A	A	LOC_Os08g01650	missense_variant	MODERATE
qSNK8.01	Chr8	383845	C	T	LOC_Os08g01650	missense_variant	MODERATE
qSNK8.01	Chr8	384191	CGGCGGT	C	LOC_Os08g01660	disruptive_inframe_deletion	MODERATE
qSNK8.01	Chr8	384398	C	A	LOC_Os08g01660	splice_region_variant&intron_variant	LOW
qSNK8.01	Chr8	384714	G	GCTAGAC	LOC_Os08g01660	disruptive_inframe_insertion	MODERATE
qSNK8.01	Chr8	387950	G	A	LOC_Os08g01660	splice_region_variant&intron_variant	LOW
qSNK8.01	Chr8	391148	T	C	LOC_Os08g01670	5_prime_UTR_premature_start_codon_gain_variant	LOW
qSNK8.01	Chr8	396648	C	A	LOC_Os08g01680	missense_variant	MODERATE
qSNK8.01	Chr8	397086	.	G	LOC_Os08g01680	missense_variant&splice_region_variant	MODERATE
qSNK8.01	Chr8	397101	.	C	LOC_Os08g01680	missense_variant	MODERATE
qSNK8.01	Chr8	397119	.	C	LOC_Os08g01680	missense_variant	MODERATE
qSNK8.01	Chr8	397137	.	G	LOC_Os08g01680	missense_variant	MODERATE
qSNK8.01	Chr8	397158	A	A	LOC_Os08g01680	splice_region_variant&intron_variant	LOW
qSNK8.01	Chr8	419472	C	G	LOC_Os08g01700	missense_variant	MODERATE
qSNK8.01	Chr8	419473	A	C	LOC_Os08g01700	missense_variant	MODERATE
qSNK8.01	Chr8	420148	C	G	LOC_Os08g01700	missense_variant	MODERATE
qSNK8.01	Chr8	420158	GGGA	G	LOC_Os08g01700	disruptive_inframe_deletion	MODERATE
qSNK8.01	Chr8	439569	G	A	LOC_Os08g01720	stop_gained	HIGH
qSNK8.01	Chr8	439759	GC	G	LOC_Os08g01720	frameshift_variant	HIGH
qSNK8.01	Chr8	447589	C	T	LOC_Os08g01740	missense_variant	MODERATE
qSNK8.01	Chr8	448609	A	T	LOC_Os08g01740	missense_variant	MODERATE
qSNK8.01	Chr8	452133	T	C	LOC_Os08g01750	missense_variant	MODERATE
qSNK8.01	Chr8	456053	T	T	LOC_Os08g01750	missense_variant	MODERATE
qSNK8.01	Chr8	457221	CGAG	CGAG	LOC_Os08g01750	disruptive_inframe_deletion	MODERATE
qSNK8.01	Chr8	457407	G	G	LOC_Os08g01750	missense_variant	MODERATE
qSNK8.01	Chr8	457442	A	A	LOC_Os08g01750	splice_region_variant&intron_variant	LOW
qSNK8.01	Chr8	457444	G	G	LOC_Os08g01750	splice_region_variant&intron_variant	LOW
qSNK8.01	Chr8	457536	G	G	LOC_Os08g01750	splice_region_variant&intron_variant	LOW
qSNK8.01	Chr8	457656	TG	TG	LOC_Os08g01750	frameshift_variant	HIGH
qSNK8.01	Chr8	457731	A	A	LOC_Os08g01750	frameshift_variant&stop_gained	HIGH
qSNK8.01	Chr8	458670	C	G	LOC_Os08g01760	5_prime_UTR_premature_start_codon_gain_variant	LOW
qSNK8.01	Chr8	458749	CCCGCCGCGCCGGCG	CCCGCCGCGCCGGCG	LOC_Os08g01760	frameshift_variant	HIGH
qSNK8.01	Chr8	458802	T	T	LOC_Os08g01760	missense_variant	MODERATE
qSNK8.01	Chr8	458977	G	G	LOC_Os08g01760	splice_donor_variant&intron_variant	HIGH
qSNK8.01	Chr8	460238	G	G	LOC_Os08g01760	missense_variant	MODERATE
qSNK8.01	Chr8	460251	T	G	LOC_Os08g01760	splice_region_variant&intron_variant	LOW
qSNK8.01	Chr8	471375	A	G	LOC_Os08g01780	missense_variant	MODERATE
qSNK8.01	Chr8	476225	G	A	LOC_Os08g01794	5_prime_UTR_premature_start_codon_gain_variant	LOW
qSNK8.01	Chr8	490144	CCTGGCT	CCTGGCT	LOC_Os08g01810	disruptive_inframe_deletion	MODERATE
qSNK8.01	Chr8	490163	CCTAG	C	LOC_Os08g01810	frameshift_variant	HIGH
qSNK8.01	Chr8	490486	A	A	LOC_Os08g01810	missense_variant	MODERATE
qSNK8.01	Chr8	490545	TC	T	LOC_Os08g01810	frameshift_variant	HIGH
qSNK8.01	Chr8	491154	G	G	LOC_Os08g01810	splice_region_variant&intron_variant	LOW
qSNK8.01	Chr8	491167	T	T	LOC_Os08g01810	missense_variant	MODERATE
qSNK8.01	Chr8	491173	G	G	LOC_Os08g01810	missense_variant	MODERATE
qSNK8.01	Chr8	492003	A	A	LOC_Os08g01810	missense_variant&splice_region_variant	MODERATE
qSNK8.01	Chr8	492013	G	G	LOC_Os08g01810	missense_variant	MODERATE
qSNK8.01	Chr8	492043	T	*	LOC_Os08g01810	missense_variant	MODERATE
qSNK8.01	Chr8	492088	C	C	LOC_Os08g01810	missense_variant	MODERATE
qSNK8.01	Chr8	492332	T	C	LOC_Os08g01810	missense_variant	MODERATE
qSNK8.01	Chr8	498535	CGTCCGCGCGCG	CGTCCGCGCGCG	LOC_Os08g01830	frameshift_variant	HIGH
qSNK8.01	Chr8	498550	TC	TC	LOC_Os08g01830	frameshift_variant	HIGH
qSNK8.01	Chr8	498552	GGGCGGCGGGCGTCGCCGGCGCCGCCGGTACGACGCGGAGC	GGGCGGCGGGCGTCGCCGGCGCCGCCGGTACGACGCGGAGC	LOC_Os08g01830	frameshift_variant	HIGH
qSNK8.01	Chr8	498677	G	G	LOC_Os08g01830	missense_variant	MODERATE
qSNK8.01	Chr8	498682	C	C	LOC_Os08g01830	missense_variant	MODERATE
qSNK8.01	Chr8	498691	G	G	LOC_Os08g01830	missense_variant	MODERATE
qSNK8.01	Chr8	529781	GCCACGCCCACGC	GCCACGC	LOC_Os08g01859	disruptive_inframe_insertion	MODERATE
qSNK8.01	Chr8	536785	C	A	LOC_Os08g01870	missense_variant	MODERATE
qSNK8.01	Chr8	536954	T	G	LOC_Os08g01870	missense_variant	MODERATE
qSNK8.01	Chr8	537232	T	T	LOC_Os08g01870	missense_variant	MODERATE
qSNK8.01	Chr8	537649	A	G	LOC_Os08g01870	missense_variant	MODERATE
qSNK8.01	Chr8	537901	A	G	LOC_Os08g01870	missense_variant	MODERATE
qSNK8.01	Chr8	537935	T	A	LOC_Os08g01870	missense_variant	MODERATE
qSNK8.01	Chr8	538003	T	C	LOC_Os08g01870	missense_variant	MODERATE
qSNK8.01	Chr8	538226	T	C	LOC_Os08g01870	missense_variant	MODERATE
qSNK8.01	Chr8	538306	T	A	LOC_Os08g01870	missense_variant	MODERATE
qSNK8.01	Chr8	538318	C	T	LOC_Os08g01870	missense_variant	MODERATE
qSNK8.01	Chr8	538808	C	A	LOC_Os08g01870	missense_variant	MODERATE
qSNK8.01	Chr8	548959	C	T	LOC_Os08g01890	missense_variant	MODERATE
qSNK8.01	Chr8	554489	T	G	LOC_Os08g01900	missense_variant	MODERATE
qSNK8.01	Chr8	555088	G	A	LOC_Os08g01900	missense_variant	MODERATE
qSNK8.01	Chr8	565002	T	G	LOC_Os08g01920	missense_variant	MODERATE
qSNK8.01	Chr8	565369	C	T	LOC_Os08g01920	missense_variant	MODERATE
qSNK8.01	Chr8	566508	C	T	LOC_Os08g01920	missense_variant	MODERATE
qSNK8.01	Chr8	567544	A	G	LOC_Os08g01920	splice_region_variant&intron_variant	LOW
qSNK8.01	Chr8	568161	C	CA	LOC_Os08g01920	splice_region_variant&intron_variant	LOW
qSNK8.01	Chr8	569245	T	A	LOC_Os08g01920	splice_region_variant&intron_variant	LOW
qSNK8.01	Chr8	577953	A	ACCC	LOC_Os08g01930	disruptive_inframe_insertion	MODERATE
qSNK8.01	Chr8	582418	A	G	LOC_Os08g01940	missense_variant	MODERATE
qSNK8.01	Chr8	597007	C	A	LOC_Os08g01950	missense_variant	MODERATE
qSNK8.01	Chr8	597145	A	C	LOC_Os08g01950	missense_variant	MODERATE
qSNK8.01	Chr8	597469	C	G	LOC_Os08g01950	missense_variant	MODERATE
qSNK8.01	Chr8	632889	G	G	LOC_Os08g01980	disruptive_inframe_insertion	MODERATE
qSNK8.01	Chr8	635432	GC	GC	LOC_Os08g01990	frameshift_variant	HIGH
qSNK8.01	Chr8	635436	T	T	LOC_Os08g01990	frameshift_variant	HIGH
qSNK8.01	Chr8	635445	G	G	LOC_Os08g01990	missense_variant	MODERATE
qSNK8.01	Chr8	635455	C	C	LOC_Os08g01990	missense_variant	MODERATE
qSNK8.01	Chr8	648486	ACTTACTTTCTCTC	ACTTACTTTCTCTC	LOC_Os08g02010	frameshift_variant&splice_donor_variant&splice_region_variant&intron_variant	HIGH
qSNK8.01	Chr8	653218	C	A	LOC_Os08g02020	missense_variant	MODERATE
qSNK8.01	Chr8	653406	T	C	LOC_Os08g02020	missense_variant	MODERATE
qSNK8.01	Chr8	653909	G	C	LOC_Os08g02020	missense_variant	MODERATE
qSNK8.01	Chr8	654099	T	C	LOC_Os08g02020	missense_variant	MODERATE
qSNK8.01	Chr8	656522	A	G	LOC_Os08g02030	missense_variant	MODERATE
qSNK8.01	Chr8	656679	G	A	LOC_Os08g02030	missense_variant	MODERATE
qSNK8.01	Chr8	659840	C	G	LOC_Os08g02040	missense_variant	MODERATE
qSNK8.01	Chr8	660759	T	C	LOC_Os08g02040	missense_variant	MODERATE
qSNK8.01	Chr8	660767	C	A	LOC_Os08g02040	missense_variant	MODERATE
qSNK8.01	Chr8	660783	G	C	LOC_Os08g02040	missense_variant	MODERATE
qSNK8.01	Chr8	660804	G	A	LOC_Os08g02040	missense_variant	MODERATE
qSNK8.01	Chr8	664857	T	C	LOC_Os08g02050	missense_variant	MODERATE
qSNK8.01	Chr8	664917	T	T	LOC_Os08g02050	missense_variant	MODERATE
qSNK8.01	Chr8	664928	A	A	LOC_Os08g02050	missense_variant	MODERATE
qSNK8.01	Chr8	664976	C	C	LOC_Os08g02050	splice_region_variant&synonymous_variant	LOW
qSNK8.01	Chr8	665500	T	T	LOC_Os08g02050	missense_variant	MODERATE
qSNK8.01	Chr8	665681	GAACA	GAACA	LOC_Os08g02050	frameshift_variant	HIGH
qSNK8.01	Chr8	665685	A	A	LOC_Os08g02050	frameshift_variant	HIGH
qSNK8.01	Chr8	665699	T	T	LOC_Os08g02050	missense_variant	MODERATE
qSNK8.01	Chr8	665740	C	C	LOC_Os08g02050	missense_variant	MODERATE
qSNK8.01	Chr8	665743	T	T	LOC_Os08g02050	missense_variant	MODERATE
qSNK8.01	Chr8	665754	T	T	LOC_Os08g02050	missense_variant	MODERATE
qSNK8.01	Chr8	665790	G	G	LOC_Os08g02050	splice_region_variant&synonymous_variant	LOW
qSNK8.01	Chr8	665795	A	A	LOC_Os08g02050	splice_region_variant&intron_variant	LOW
qSNK8.01	Chr8	665798	ATG	ATG	LOC_Os08g02050	splice_region_variant&intron_variant	LOW
qSNK8.01	Chr8	665867	AGG	AGG	LOC_Os08g02050	splice_region_variant&intron_variant	LOW
qSNK8.01	Chr8	665870	G	G	LOC_Os08g02050	splice_region_variant&intron_variant	LOW
qSNK8.01	Chr8	666003	T	T	LOC_Os08g02050	missense_variant	MODERATE
qSNK8.01	Chr8	666692	T	C	LOC_Os08g02050	missense_variant	MODERATE
qSNK8.01	Chr8	671307	TG	T	LOC_Os08g02060	frameshift_variant	HIGH
qSNK8.01	Chr8	683994	A	C	LOC_Os08g02080	missense_variant	MODERATE
qSNK8.01	Chr8	686395	T	C	LOC_Os08g02094	missense_variant	MODERATE
qSNK8.01	Chr8	697300	C	A	LOC_Os08g02110	missense_variant	MODERATE
qSNK8.01	Chr8	697669	C	A	LOC_Os08g02110	missense_variant	MODERATE
qSNK8.01	Chr8	701359	AGCG	A	LOC_Os08g02120	disruptive_inframe_deletion	MODERATE
qSNK8.01	Chr8	708320	T	A	LOC_Os08g02130	missense_variant	MODERATE
qSNK8.01	Chr8	712335	T	C	LOC_Os08g02130	missense_variant	MODERATE
qSNK8.01	Chr8	712906	G	A	LOC_Os08g02130	missense_variant	MODERATE
qSNK8.01	Chr8	716851	C	T	LOC_Os08g02140	missense_variant	MODERATE
qSNK8.01	Chr8	719489	T	A	LOC_Os08g02140	missense_variant	MODERATE
qSNK8.01	Chr8	720943	G	A	LOC_Os08g02150	missense_variant	MODERATE
qSNK8.01	Chr8	721229	A	C	LOC_Os08g02150	missense_variant	MODERATE
qSNK8.01	Chr8	721619	C	T	LOC_Os08g02150	missense_variant	MODERATE
qSNK8.01	Chr8	721786	A	C	LOC_Os08g02150	missense_variant	MODERATE
qSNK8.01	Chr8	734462	A	G	LOC_Os08g02160	missense_variant	MODERATE
qSNK8.01	Chr8	734465	G	G	LOC_Os08g02160	missense_variant	MODERATE
qSNK8.01	Chr8	734467	T	T	LOC_Os08g02160	missense_variant	MODERATE
qSNK8.01	Chr8	734468	C	C	LOC_Os08g02160	missense_variant	MODERATE
qSNK8.01	Chr8	734473	G	G	LOC_Os08g02160	missense_variant	MODERATE
qSNK8.01	Chr8	734521	T	C	LOC_Os08g02160	missense_variant	MODERATE
qSNK8.01	Chr8	735043	C	A	LOC_Os08g02180	missense_variant	MODERATE
qSNK8.01	Chr8	735154	T	C	LOC_Os08g02180	missense_variant	MODERATE
qSNK8.01	Chr8	735267	CGAG	C	LOC_Os08g02180	disruptive_inframe_deletion	MODERATE
qSNK8.01	Chr8	735528	A	T	LOC_Os08g02180	missense_variant	MODERATE
qSNK8.01	Chr8	735611	T	C	LOC_Os08g02180	5_prime_UTR_premature_start_codon_gain_variant	LOW
qSNK8.01	Chr8	743651	C	T	LOC_Os08g02190	splice_region_variant&intron_variant	LOW
qSNK8.01	Chr8	744926	G	A	LOC_Os08g02190	missense_variant	MODERATE
qSNK8.01	Chr8	745239	A	G	LOC_Os08g02190	missense_variant	MODERATE
qSNK8.01	Chr8	747144	T	C	LOC_Os08g02200	splice_region_variant	LOW
qSNK8.01	Chr8	750729	A	.	LOC_Os08g02204	missense_variant	MODERATE
qSNK8.01	Chr8	752814	C	G	LOC_Os08g02210	splice_region_variant	LOW
qAKT8.27	Chr8	27694529	T	A	LOC_Os08g43980	missense_variant	MODERATE
qAKT8.27	Chr8	27694692	T	C	LOC_Os08g43980	missense_variant	MODERATE
qAKT8.27	Chr8	27706675	G	A	LOC_Os08g44010	missense_variant&splice_region_variant	MODERATE
qAKT8.27	Chr8	27708430	T	C	LOC_Os08g44015	missense_variant	MODERATE
qAKT8.27	Chr8	27709155	C	T	LOC_Os08g44015	missense_variant	MODERATE
qAKT8.27	Chr8	27714781	C	G	LOC_Os08g44020	missense_variant	MODERATE
qAKT8.27	Chr8	27715032	G	A	LOC_Os08g44020	splice_region_variant&intron_variant	LOW
qAKT8.27	Chr8	27717215	T	T	LOC_Os08g44020	missense_variant	MODERATE
qAKT8.27	Chr8	27728066	C	T	LOC_Os08g44040	missense_variant	MODERATE
qAKT8.27	Chr8	27733610	G	C	LOC_Os08g44050	missense_variant	MODERATE
qAKT8.27	Chr8	27734108	T	A	LOC_Os08g44050	missense_variant	MODERATE
qAKT8.27	Chr8	27734112	C	G	LOC_Os08g44050	missense_variant	MODERATE
qAKT8.27	Chr8	27742569	G	A	LOC_Os08g44060	missense_variant	MODERATE
qAKT8.27	Chr8	27742572	A	G	LOC_Os08g44060	stop_gained	HIGH
qAKT8.27	Chr8	27742736	G	A	LOC_Os08g44060	missense_variant	MODERATE
qAKT8.27	Chr8	27759778	C	G	LOC_Os08g44080	missense_variant	MODERATE
qAKT8.27	Chr8	27760228	G	A	LOC_Os08g44080	missense_variant	MODERATE
qAKT8.27	Chr8	27794711	A	G	LOC_Os08g44150	missense_variant	MODERATE
qAKT8.27	Chr8	27794736	C	T	LOC_Os08g44150	missense_variant	MODERATE
qAKT8.27	Chr8	27794835	A	C	LOC_Os08g44150	missense_variant	MODERATE
qAKT8.27	Chr8	27795059	C	T	LOC_Os08g44150	missense_variant	MODERATE
qAKT8.27	Chr8	27796489	A	G	LOC_Os08g44150	missense_variant	MODERATE
qAKT8.27	Chr8	27796937	T	C	LOC_Os08g44150	missense_variant	MODERATE
qAKT8.27	Chr8	27798720	T	C	LOC_Os08g44160	missense_variant	MODERATE
qAKT8.27	Chr8	27798884	A	G	LOC_Os08g44160	missense_variant	MODERATE
qAKT8.27	Chr8	27799360	TA	T	LOC_Os08g44160	splice_region_variant&intron_variant	LOW
qAKT8.27	Chr8	27800455	C	T	LOC_Os08g44160	missense_variant	MODERATE
qAKT8.27	Chr8	27802467	T	A	LOC_Os08g44160	missense_variant	MODERATE
qAKT8.27	Chr8	27802512	G	A	LOC_Os08g44160	missense_variant	MODERATE
qAKT8.27	Chr8	27802548	G	A	LOC_Os08g44160	missense_variant	MODERATE
qAKT8.27	Chr8	27802595	T	C	LOC_Os08g44160	missense_variant	MODERATE
qAKT8.27	Chr8	27802704	G	A	LOC_Os08g44160	missense_variant	MODERATE
qAKT8.27	Chr8	27802740	T	C	LOC_Os08g44160	missense_variant	MODERATE
qAKT8.27	Chr8	27811412	T	C	LOC_Os08g44180	splice_region_variant&intron_variant	LOW
qAKT8.27	Chr8	27812152	A	G	LOC_Os08g44180	missense_variant	MODERATE
qAKT8.27	Chr8	27814317	G	A	LOC_Os08g44180	missense_variant	MODERATE
qAKT8.27	Chr8	27818535	G	A	LOC_Os08g44190	missense_variant	MODERATE
qAKT8.27	Chr8	27825747	G	C	LOC_Os08g44200	missense_variant	MODERATE
qAKT8.27	Chr8	27826703	G	C	LOC_Os08g44200	missense_variant	MODERATE
qAKT8.27	Chr8	27827875	TGAG	T	LOC_Os08g44200	disruptive_inframe_deletion	MODERATE
qAKT8.27	Chr8	27842489	C	T	LOC_Os08g44230	5_prime_UTR_premature_start_codon_gain_variant	LOW
qAKT8.27	Chr8	27842609	G	T	LOC_Os08g44230	splice_region_variant&intron_variant	LOW
qAKT8.27	Chr8	27844587	T	C	LOC_Os08g44230	missense_variant	MODERATE
qAKT8.27	Chr8	27845307	C	A	LOC_Os08g44230	missense_variant	MODERATE
qAKT8.27	Chr8	27845684	G	A	LOC_Os08g44230	missense_variant	MODERATE
qAKT8.27	Chr8	27847633	C	A	LOC_Os08g44230	splice_region_variant	LOW
qAKT8.27	Chr8	27849194	C	T	LOC_Os08g44240	missense_variant	MODERATE
qAKT8.27	Chr8	27850935	T	C	LOC_Os08g44240	missense_variant	MODERATE
qAKT8.27	Chr8	27851729	A	G	LOC_Os08g44240	missense_variant	MODERATE
qAKT8.27	Chr8	27852513	C	T	LOC_Os08g44240	missense_variant	MODERATE
qAKT8.27	Chr8	27852681	A	G	LOC_Os08g44240	missense_variant	MODERATE
qAKT8.27	Chr8	27859698	C	T	LOC_Os08g44260	missense_variant	MODERATE
qAKT8.27	Chr8	27859741	G	C	LOC_Os08g44260	missense_variant	MODERATE
qAKT8.27	Chr8	27863970	A	C	LOC_Os08g44260	splice_region_variant&intron_variant	LOW
qAKT8.27	Chr8	27866780	A	G	LOC_Os08g44260	splice_region_variant&intron_variant	LOW
qAKT8.27	Chr8	27867763	G	A	LOC_Os08g44260	missense_variant	MODERATE
qAKT8.27	Chr8	27875576	G	T	LOC_Os08g44270	missense_variant	MODERATE
qAKT8.27	Chr8	27877748	G	T	LOC_Os08g44280	5_prime_UTR_premature_start_codon_gain_variant	LOW
qAKT8.27	Chr8	27878078	T	C	LOC_Os08g44280	missense_variant	MODERATE
qAKT8.27	Chr8	27881840	ACCT	A	LOC_Os08g44290	disruptive_inframe_deletion	MODERATE
qAKT8.27	Chr8	27881846	T	A	LOC_Os08g44290	missense_variant	MODERATE
qAKT8.27	Chr8	27888000	CCGG	C	LOC_Os08g44310	disruptive_inframe_deletion	MODERATE
qAKT8.27	Chr8	27892817	G	T	LOC_Os08g44320	missense_variant	MODERATE
qAKT8.27	Chr8	27894477	T	C	LOC_Os08g44330	missense_variant	MODERATE
qAKT8.27	Chr8	27900193	ACCAT	A	LOC_Os08g44340	splice_region_variant&intron_variant	LOW
qAKT8.27	Chr8	27900341	G	A	LOC_Os08g44340	splice_region_variant&synonymous_variant	LOW
qAKT8.27	Chr8	27901470	A	G	LOC_Os08g44340	missense_variant	MODERATE
qAKT8.27	Chr8	27902307	C	A	LOC_Os08g44340	missense_variant	MODERATE
qAKT8.27	Chr8	27904951	T	G	LOC_Os08g44350	missense_variant	MODERATE
qAKT8.27	Chr8	27905115	A	G	LOC_Os08g44350	splice_region_variant&intron_variant	LOW
qAKT8.27	Chr8	27905241	T	G	LOC_Os08g44350	missense_variant	MODERATE
qAKT8.27	Chr8	27923365	G	C	LOC_Os08g44370	splice_region_variant&intron_variant	LOW
qAKT8.27	Chr8	27923715	C	T	LOC_Os08g44370	splice_region_variant&intron_variant	LOW
qAKT8.27	Chr8	27932303	T	TA	LOC_Os08g44390	frameshift_variant	HIGH
qAKT8.27	Chr8	27932661	C	G	LOC_Os08g44390	missense_variant	MODERATE
qAKT8.27	Chr8	27933854	C	T	LOC_Os08g44390	missense_variant&splice_region_variant	MODERATE
qAKT8.27	Chr8	27942311	A	G	LOC_Os08g44410	missense_variant	MODERATE
qAKT8.27	Chr8	27942335	G	A	LOC_Os08g44410	missense_variant	MODERATE
qAKT8.27	Chr8	27942597	G	C	LOC_Os08g44410	missense_variant	MODERATE
qAKT8.27	Chr8	27959830	C	T	LOC_Os08g44440	missense_variant	MODERATE
qAKT8.27	Chr8	27968803	AG	A	LOC_Os08g44470	frameshift_variant	HIGH
qAKT8.27	Chr8	27968908	A	C	LOC_Os08g44470	splice_acceptor_variant&intron_variant	HIGH
qAKT8.27	Chr8	27970507	G	A	LOC_Os08g44470	missense_variant	MODERATE
qAKT8.27	Chr8	27973532	C	CTGT	LOC_Os08g44480	disruptive_inframe_insertion	MODERATE
qAKT8.27	Chr8	27991851	TCTC	T	LOC_Os08g44510	splice_region_variant&intron_variant	LOW
qAKT8.27	Chr8	27997207	G	GAC	LOC_Os08g44510	splice_region_variant&intron_variant	LOW
qAKT8.27	Chr8	27998573	T	G	LOC_Os08g44510	missense_variant	MODERATE
qAKT8.27	Chr8	28011058	G	GA	LOC_Os08g44550	splice_region_variant	LOW
qAKT8.27	Chr8	28011499	T	A	LOC_Os08g44550	missense_variant	MODERATE
qAKT8.27	Chr8	28012167	G	A	LOC_Os08g44550	splice_region_variant&intron_variant	LOW
qAKT8.27	Chr8	28016090	A	C	LOC_Os08g44560	missense_variant	MODERATE
qAKT8.27	Chr8	28016172	G	A	LOC_Os08g44560	missense_variant	MODERATE
qAKT8.27	Chr8	28016648	A	G	LOC_Os08g44560	missense_variant	MODERATE
qAKT8.27	Chr8	28017178	ACT	A	LOC_Os08g44560	splice_region_variant&intron_variant	LOW
qAKT8.27	Chr8	28018159	A	G	LOC_Os08g44560	missense_variant	MODERATE
qAKT8.27	Chr8	28043653	C	T	LOC_Os08g44590	missense_variant	MODERATE
qAKT8.27	Chr8	28056487	T	C	LOC_Os08g44610	missense_variant	MODERATE
qAKT8.27	Chr8	28056870	G	A	LOC_Os08g44610	missense_variant	MODERATE
qAKT8.27	Chr8	28056879	G	.	LOC_Os08g44610	stop_lost&splice_region_variant	HIGH
qAKT8.27	Chr8	28060641	G	G	LOC_Os08g44620	missense_variant	MODERATE
qAKT8.27	Chr8	28069404	A	G	LOC_Os08g44640	missense_variant	MODERATE
qAKT8.27	Chr8	28069470	T	G	LOC_Os08g44640	missense_variant	MODERATE
qAKT8.27	Chr8	28072227	A	G	LOC_Os08g44640	missense_variant	MODERATE
qAKT8.27	Chr8	28072267	A	C	LOC_Os08g44640	missense_variant	MODERATE
qAKT8.27	Chr8	28077081	A	G	LOC_Os08g44650	missense_variant	MODERATE
qAKT8.27	Chr8	28079709	A	G	LOC_Os08g44660	missense_variant	MODERATE
qAKT8.27	Chr8	28079791	C	T	LOC_Os08g44660	missense_variant	MODERATE
qAKT8.27	Chr8	28082239	G	A	LOC_Os08g44670	missense_variant	MODERATE
qAKT8.27	Chr8	28085335	C	G	LOC_Os08g44690	missense_variant	MODERATE
qAKT8.27	Chr8	28085435	T	C	LOC_Os08g44690	stop_gained	HIGH
qAKT8.27	Chr8	28085643	A	.	LOC_Os08g44690	missense_variant	MODERATE
qAKT8.27	Chr8	28085781	T	.	LOC_Os08g44690	missense_variant	MODERATE
qAKT8.27	Chr8	28086068	AAGAAGGAACAAACT	A	LOC_Os08g44690	frameshift_variant	HIGH
qAKT8.27	Chr8	28086128	G	A	LOC_Os08g44690	missense_variant	MODERATE
qAKT8.27	Chr8	28086156	A	T	LOC_Os08g44690	missense_variant	MODERATE
qAKT8.27	Chr8	28086194	C	T	LOC_Os08g44690	missense_variant	MODERATE
qAKT8.27	Chr8	28111206	A	G	LOC_Os08g44730	missense_variant	MODERATE
qAKT8.27	Chr8	28112876	C	T	LOC_Os08g44740	missense_variant	MODERATE
qAKT8.27	Chr8	28112897	G	A	LOC_Os08g44740	missense_variant	MODERATE
qAKT8.27	Chr8	28112944	C	T	LOC_Os08g44740	missense_variant	MODERATE
qAKT8.27	Chr8	28112993	T	C	LOC_Os08g44740	missense_variant	MODERATE
qAKT8.27	Chr8	28113038	G	A	LOC_Os08g44740	missense_variant	MODERATE
qAKT8.27	Chr8	28113067	G	GGA	LOC_Os08g44740	frameshift_variant&stop_gained	HIGH
qAKT8.27	Chr8	28113677	C	G	LOC_Os08g44740	missense_variant&splice_region_variant	MODERATE
qAKT8.27	Chr8	28119651	G	A	LOC_Os08g44750	missense_variant	MODERATE
qAKT8.27	Chr8	28119652	C	A	LOC_Os08g44750	missense_variant	MODERATE
qAKT8.27	Chr8	28123931	A	G	LOC_Os08g44760	missense_variant	MODERATE
qAKT8.27	Chr8	28125099	G	A	LOC_Os08g44760	missense_variant	MODERATE
qAKT8.27	Chr8	28125967	G	A	LOC_Os08g44760	missense_variant	MODERATE
qAKT8.27	Chr8	28132405	T	A	LOC_Os08g44770	5_prime_UTR_premature_start_codon_gain_variant	LOW
qAKT8.27	Chr8	28132682	C	G	LOC_Os08g44770	missense_variant	MODERATE
qSKC9.22	Chr9	22419037	C	G	LOC_Os09g39050	missense_variant	MODERATE
qSKC9.22	Chr9	22419632	G	T	LOC_Os09g39050	missense_variant	MODERATE
qSKC9.22	Chr9	22419883	C	T	LOC_Os09g39050	missense_variant	MODERATE
qSKC9.22	Chr9	22420015	A	G	LOC_Os09g39050	missense_variant	MODERATE
qSKC9.22	Chr9	22421310	T	G	LOC_Os09g39060	missense_variant	MODERATE
qSKC9.22	Chr9	22422058	C	C	LOC_Os09g39060	missense_variant	MODERATE
qSKC9.22	Chr9	22422096	T	T	LOC_Os09g39060	missense_variant	MODERATE
qSKC9.22	Chr9	22427702	A	T	LOC_Os09g39070	missense_variant	MODERATE
qSKC9.22	Chr9	22427804	G	A	LOC_Os09g39070	missense_variant	MODERATE
qSKC9.22	Chr9	22428366	A	A	LOC_Os09g39070	missense_variant	MODERATE
qSKC9.22	Chr9	22428379	A	A	LOC_Os09g39070	missense_variant	MODERATE
qSKC9.22	Chr9	22428387	G	G	LOC_Os09g39070	missense_variant	MODERATE
qSKC9.22	Chr9	22430266	TCGC	TCGC	LOC_Os09g39070	disruptive_inframe_deletion	MODERATE
qSKC9.22	Chr9	22430313	A	A	LOC_Os09g39070	missense_variant	MODERATE
qSKC9.22	Chr9	22430396	T	C	LOC_Os09g39070	missense_variant	MODERATE
qSKC9.22	Chr9	22433651	C	T	LOC_Os09g39080	missense_variant	MODERATE
qSKC9.22	Chr9	22438124	C	G	LOC_Os09g39090	missense_variant	MODERATE
qSKC9.22	Chr9	22438234	TCTTAACGATCC	TCTTAACGATCC	LOC_Os09g39090	frameshift_variant	HIGH
qSKC9.22	Chr9	22438659	GGGTAGTAGGGAAGCTTGCCGCATTGGTCCAA	G	LOC_Os09g39090	frameshift_variant	HIGH
qSKC9.22	Chr9	22438815	ATCGCGTTGATCCCC	A	LOC_Os09g39090	frameshift_variant	HIGH
qSKC9.22	Chr9	22439053	GCCATTCAGTCT	G	LOC_Os09g39090	frameshift_variant	HIGH
qSKC9.22	Chr9	22439318	GACGGCGCGTAC	G	LOC_Os09g39090	frameshift_variant	HIGH
qSKC9.22	Chr9	22439393	A	C	LOC_Os09g39090	missense_variant	MODERATE
qSKC9.22	Chr9	22445772	AGGATATCCCGCTCCATGC	A	LOC_Os09g39100	disruptive_inframe_deletion	MODERATE
qSKC9.22	Chr9	22447874	C	T	LOC_Os09g39100	splice_region_variant&intron_variant	LOW
qSKC9.22	Chr9	22447908	T	C	LOC_Os09g39100	missense_variant	MODERATE
qSKC9.22	Chr9	22448039	G	A	LOC_Os09g39100	missense_variant	MODERATE
qSKC9.22	Chr9	22448199	ACACGCTGCACCAC	A	LOC_Os09g39100	frameshift_variant	HIGH
qSKC9.22	Chr9	22451513	C	A	LOC_Os09g39110	missense_variant	MODERATE
qSKC9.22	Chr9	22451580	C	T	LOC_Os09g39110	missense_variant	MODERATE
qSKC9.22	Chr9	22452432	A	T	LOC_Os09g39110	missense_variant	MODERATE
qSNC10.16	Chr10	16690112	T	G	LOC_Os10g31820	splice_region_variant&synonymous_variant	LOW
qSNC10.16	Chr10	16691548	T	G	LOC_Os10g31820	missense_variant	MODERATE
qSKC10.18	Chr10	18317578	G	A	LOC_Os10g34360	missense_variant	MODERATE
qSKC10.18	Chr10	18318071	A	G	LOC_Os10g34360	missense_variant	MODERATE
qSKC10.18	Chr10	18318076	A	G	LOC_Os10g34360	missense_variant	MODERATE
qSKC10.18	Chr10	18318265	G	A	LOC_Os10g34360	missense_variant	MODERATE
qSKC10.18	Chr10	18319682	G	A	LOC_Os10g34370	missense_variant	MODERATE
qSKC10.18	Chr10	18321353	C	T	LOC_Os10g34380	missense_variant	MODERATE
qSKC10.18	Chr10	18329464	T	C	LOC_Os10g34380	missense_variant	MODERATE
qSKC10.18	Chr10	18331609	G	A	LOC_Os10g34380	missense_variant	MODERATE
qSKC10.18	Chr10	18333688	A	C	LOC_Os10g34390	missense_variant	MODERATE
qSKC10.18	Chr10	18335410	A	C	LOC_Os10g34390	missense_variant	MODERATE
qSKC10.18	Chr10	18336111	T	C	LOC_Os10g34390	missense_variant	MODERATE
qSKC10.18	Chr10	18339019	A	C	LOC_Os10g34390	missense_variant	MODERATE
qSKC10.18	Chr10	18339767	C	G	LOC_Os10g34390	missense_variant	MODERATE
qSKC10.18	Chr10	18339892	G	A	LOC_Os10g34390	5_prime_UTR_premature_start_codon_gain_variant	LOW
qSKC10.18	Chr10	18345563	T	C	LOC_Os10g34400	splice_region_variant&synonymous_variant	LOW
qSKC10.18	Chr10	18348538	C	T	LOC_Os10g34400	missense_variant	MODERATE
qSKC10.18	Chr10	18352027	A	AC	LOC_Os10g34400	splice_region_variant	LOW
qSKC10.18	Chr10	18362698	A	G	LOC_Os10g34430	missense_variant	MODERATE
qSKC10.18	Chr10	18362716	T	G	LOC_Os10g34430	missense_variant	MODERATE
qSKC10.18	Chr10	18362888	A	G	LOC_Os10g34430	missense_variant	MODERATE
qSKC10.18	Chr10	18362962	T	G	LOC_Os10g34430	missense_variant	MODERATE
qSKC10.18	Chr10	18364764	A	G	LOC_Os10g34430	missense_variant	MODERATE
qSKC10.18	Chr10	18367055	G	A	LOC_Os10g34430	missense_variant	MODERATE
qSKC10.18	Chr10	18367354	A	T	LOC_Os10g34430	missense_variant	MODERATE
qSKC10.18	Chr10	18367541	G	T	LOC_Os10g34430	missense_variant	MODERATE
qSKC10.18	Chr10	18370109	A	G	LOC_Os10g34430	missense_variant	MODERATE
qSKC10.18	Chr10	18370222	T	G	LOC_Os10g34430	missense_variant	MODERATE
qSKC10.18	Chr10	18371293	GAGA	G	LOC_Os10g34430	disruptive_inframe_deletion	MODERATE
qSKC10.18	Chr10	18375741	T	C	LOC_Os10g34440	missense_variant	MODERATE
qSKC10.18	Chr10	18375767	G	C	LOC_Os10g34440	missense_variant	MODERATE
qSKC10.18	Chr10	18376037	TCGC	T	LOC_Os10g34440	disruptive_inframe_deletion	MODERATE
qSKC10.18	Chr10	18377782	C	T	LOC_Os10g34440	missense_variant	MODERATE
qSKC10.18	Chr10	18402218	A	G	LOC_Os10g34490	start_lost	HIGH
qSKC10.18	Chr10	18402333	A	G	LOC_Os10g34490	missense_variant	MODERATE
qSKC10.18	Chr10	18402362	A	C	LOC_Os10g34490	missense_variant	MODERATE
qSKC10.18	Chr10	18403126	G	GCGCTCAC	LOC_Os10g34490	frameshift_variant	HIGH
qSKC10.18	Chr10	18404303	C	G	LOC_Os10g34500	missense_variant	MODERATE
qSKC10.18	Chr10	18404363	C	T	LOC_Os10g34500	missense_variant	MODERATE
qSKC10.18	Chr10	18404519	G	C	LOC_Os10g34500	missense_variant	MODERATE
qSKC10.18	Chr10	18407399	G	T	LOC_Os10g34500	missense_variant	MODERATE
qSKC10.18	Chr10	18407552	G	T	LOC_Os10g34500	missense_variant	MODERATE
qSKC10.18	Chr10	18407598	G	A	LOC_Os10g34500	splice_region_variant&intron_variant	LOW
qSKC10.18	Chr10	18417390	C	T	LOC_Os10g34529	missense_variant	MODERATE
qSKC10.18	Chr10	18417432	A	G	LOC_Os10g34529	missense_variant	MODERATE
qSKC10.18	Chr10	18426621	A	G	LOC_Os10g34550	missense_variant	MODERATE
qSKC10.18	Chr10	18426693	C	T	LOC_Os10g34550	missense_variant	MODERATE
qSKC10.18	Chr10	18426734	C	T	LOC_Os10g34550	missense_variant	MODERATE
qSKC10.18	Chr10	18426738	G	A	LOC_Os10g34550	missense_variant	MODERATE
qSKC10.18	Chr10	18429876	G	A	LOC_Os10g34560	missense_variant	MODERATE
qSKC10.18	Chr10	18429960	C	T	LOC_Os10g34560	missense_variant	MODERATE
qSKC10.18	Chr10	18430025	C	G	LOC_Os10g34560	missense_variant	MODERATE
qSKC10.18	Chr10	18433121	T	C	LOC_Os10g34570	missense_variant	MODERATE
qSKC10.18	Chr10	18435104	G	T	LOC_Os10g34580	splice_region_variant&intron_variant	LOW
qSKC10.18	Chr10	18435639	G	C	LOC_Os10g34580	missense_variant	MODERATE
qSKC10.18	Chr10	18436868	C	G	LOC_Os10g34580	missense_variant	MODERATE
qSKC10.18	Chr10	18441423	T	C	LOC_Os10g34590	missense_variant	MODERATE
qSKC10.18	Chr10	18441723	T	C	LOC_Os10g34590	missense_variant	MODERATE
qSKC10.18	Chr10	18446204	C	G	LOC_Os10g34602	missense_variant	MODERATE
qSKC10.18	Chr10	18452230	CAA	C	LOC_Os10g34614	frameshift_variant	HIGH
qSKC10.18	Chr10	18453490	C	A	LOC_Os10g34614	stop_gained	HIGH
qSKC10.18	Chr10	18463497	C	C	LOC_Os10g34650	missense_variant	MODERATE
qSKC10.18	Chr10	18463505	C	C	LOC_Os10g34650	missense_variant	MODERATE
qSKC10.18	Chr10	18463513	G	G	LOC_Os10g34650	stop_gained	HIGH
qSKC10.18	Chr10	18463533	G	G	LOC_Os10g34650	missense_variant	MODERATE
qSKC10.18	Chr10	18463609	T	C	LOC_Os10g34650	missense_variant	MODERATE
qSKC10.18	Chr10	18463966	G	G	LOC_Os10g34650	missense_variant	MODERATE
qSKC10.18	Chr10	18463974	TGGCTAGCAAGGGCACCCTCGAGATCTG	TGGCTAGCAAGGGCACCCTCGAGATCTG	LOC_Os10g34650	splice_acceptor_variant&disruptive_inframe_deletion&splice_region_variant&intron_variant	HIGH
qSKC10.18	Chr10	18464097	C	C	LOC_Os10g34650	missense_variant&splice_region_variant	MODERATE
qSKC10.18	Chr10	18464099	G	G	LOC_Os10g34650	missense_variant&splice_region_variant	MODERATE
qSKC10.18	Chr10	18464124	T	C	LOC_Os10g34650	missense_variant	MODERATE
qSKC10.18	Chr10	18464467	T	C	LOC_Os10g34650	missense_variant	MODERATE
qSKC10.18	Chr10	18464578	C	C	LOC_Os10g34650	missense_variant	MODERATE
qSKC10.18	Chr10	18464667	G	G	LOC_Os10g34650	missense_variant	MODERATE
qSKC10.18	Chr10	18464824	T	T	LOC_Os10g34650	missense_variant	MODERATE
qSKC10.18	Chr10	18464832	C	C	LOC_Os10g34650	missense_variant	MODERATE
qSKC10.18	Chr10	18464841	C	C	LOC_Os10g34650	missense_variant	MODERATE
qSKC10.18	Chr10	18464845	T	C	LOC_Os10g34650	missense_variant	MODERATE
qSKC10.18	Chr10	18465696	A	G	LOC_Os10g34650	missense_variant	MODERATE
qSKC10.18	Chr10	18471171	A	G	LOC_Os10g34660	5_prime_UTR_premature_start_codon_gain_variant	LOW
qSKC10.18	Chr10	18471192	C	T	LOC_Os10g34660	5_prime_UTR_premature_start_codon_gain_variant	LOW
qSKC10.18	Chr10	18472985	C	A	LOC_Os10g34660	missense_variant	MODERATE
qSKC10.18	Chr10	18486576	T	G	LOC_Os10g34680	5_prime_UTR_premature_start_codon_gain_variant	LOW
qSKC10.18	Chr10	18495715	G	A	LOC_Os10g34680	missense_variant	MODERATE
qSKC10.18	Chr10	18499645	T	C	LOC_Os10g34694	missense_variant	MODERATE
qSKC10.18	Chr10	18499693	G	A	LOC_Os10g34694	splice_region_variant&intron_variant	LOW
qSKC10.18	Chr10	18505069	A	G	LOC_Os10g34700	missense_variant	MODERATE
qSKC10.18	Chr10	18505308	T	G	LOC_Os10g34700	missense_variant	MODERATE
qSKC10.18	Chr10	18524161	A	G	LOC_Os10g34704	missense_variant	MODERATE
qSKC10.18	Chr10	18524180	G	A	LOC_Os10g34704	splice_donor_variant&intron_variant	HIGH
qSKC10.18	Chr10	18534819	A	G	LOC_Os10g34710	missense_variant	MODERATE
qSKC10.18	Chr10	18545384	A	G	LOC_Os10g34730	splice_region_variant&intron_variant	LOW
qSKC10.18	Chr10	18551979	G	T	LOC_Os10g34740	splice_region_variant&intron_variant	LOW
qSKC10.18	Chr10	18559146	G	A	LOC_Os10g34750	missense_variant	MODERATE
qSKC10.18	Chr10	18565009	A	A	LOC_Os10g34770	missense_variant	MODERATE
qSKC10.18	Chr10	18565033	A	A	LOC_Os10g34770	missense_variant	MODERATE
qSKC10.18	Chr10	18565245	A	A	LOC_Os10g34770	missense_variant	MODERATE
qSKC10.18	Chr10	18565269	T	T	LOC_Os10g34770	missense_variant	MODERATE
qSKC10.18	Chr10	18565271	G	G	LOC_Os10g34770	missense_variant	MODERATE
qSKC10.18	Chr10	18565272	T	T	LOC_Os10g34770	missense_variant	MODERATE
qSKC10.18	Chr10	18565444	C	A	LOC_Os10g34770	missense_variant	MODERATE
qSKC10.18	Chr10	18574905	T	C	LOC_Os10g34790	missense_variant	MODERATE
qSKC10.18	Chr10	18580254	C	C	LOC_Os10g34795	missense_variant	MODERATE
qSKC10.18	Chr10	18580261	AC	AC	LOC_Os10g34795	frameshift_variant	HIGH
qSKC10.18	Chr10	18580280	C	C	LOC_Os10g34795	missense_variant	MODERATE
qSKC10.18	Chr10	18580308	T	C	LOC_Os10g34795	missense_variant	MODERATE
qSKC10.18	Chr10	18580310	T	C	LOC_Os10g34795	missense_variant	MODERATE
qSKC10.18	Chr10	18590225	T	C	LOC_Os10g34810	missense_variant	MODERATE
qSKC10.18	Chr10	18592176	A	T	LOC_Os10g34820	missense_variant	MODERATE
qSKC10.18	Chr10	18592432	G	A	LOC_Os10g34820	missense_variant	MODERATE
qSKC10.18	Chr10	18592571	A	G	LOC_Os10g34820	missense_variant	MODERATE
qSKC10.18	Chr10	18592610	A	C	LOC_Os10g34820	missense_variant	MODERATE
qSKC10.18	Chr10	18593366	A	G	LOC_Os10g34820	missense_variant	MODERATE
qSKC10.18	Chr10	18593534	G	T	LOC_Os10g34820	missense_variant	MODERATE
qSKC10.18	Chr10	18598826	T	C	LOC_Os10g34840	missense_variant	MODERATE
qSKC10.18	Chr10	18614951	C	T	LOC_Os10g34884	missense_variant	MODERATE
qSKC10.18	Chr10	18617648	T	.	LOC_Os10g34884	splice_region_variant&intron_variant	LOW
qSKC10.18	Chr10	18628548	C	T	LOC_Os10g34896	missense_variant	MODERATE
qSKC10.18	Chr10	18628550	T	C	LOC_Os10g34896	missense_variant	MODERATE
qSKC10.18	Chr10	18628557	G	A	LOC_Os10g34896	missense_variant	MODERATE
qSKC10.18	Chr10	18628571	C	G	LOC_Os10g34896	splice_acceptor_variant&intron_variant	HIGH
qSKC10.18	Chr10	18629039	G	C	LOC_Os10g34896	missense_variant	MODERATE
qSKC10.18	Chr10	18629057	C	G	LOC_Os10g34896	missense_variant	MODERATE
qSKC10.18	Chr10	18629106	G	T	LOC_Os10g34896	missense_variant	MODERATE
qSKC10.18	Chr10	18629118	CGCCGAGGCGCA	C	LOC_Os10g34896	frameshift_variant	HIGH
qSKC10.18	Chr10	18629301	C	T	LOC_Os10g34896	missense_variant	MODERATE
qSKC10.18	Chr10	18629328	C	T	LOC_Os10g34896	missense_variant	MODERATE
qSKC10.18	Chr10	18629339	A	G	LOC_Os10g34896	missense_variant	MODERATE
qSKC10.18	Chr10	18631534	T	G	LOC_Os10g34902	missense_variant	MODERATE
qSKC10.18	Chr10	18631729	T	C	LOC_Os10g34902	missense_variant	MODERATE
qSKC10.18	Chr10	18631809	TCGCCGC	T	LOC_Os10g34902	disruptive_inframe_deletion	MODERATE
qSKC10.18	Chr10	18635544	T	G	LOC_Os10g34910	missense_variant	MODERATE
qSKC10.18	Chr10	18635843	C	G	LOC_Os10g34910	missense_variant	MODERATE
qSKC10.18	Chr10	18637834	T	C	LOC_Os10g34920	missense_variant	MODERATE
qSKC10.18	Chr10	18638155	C	T	LOC_Os10g34920	missense_variant	MODERATE
qSKC10.18	Chr10	18640472	C	T	LOC_Os10g34930	missense_variant	MODERATE
qSKC10.18	Chr10	18658668	CCCTTCTCCCCGCCGGTCACCAT	C	LOC_Os10g34960	frameshift_variant	HIGH
qSKC10.18	Chr10	18660174	G	A	LOC_Os10g34960	missense_variant	MODERATE
qSKC10.18	Chr10	18662440	AAC	A	LOC_Os10g34970	splice_region_variant&intron_variant	LOW
qSKC10.18	Chr10	18662761	T	C	LOC_Os10g34970	missense_variant	MODERATE
qSKC10.18	Chr10	18664276	G	A	LOC_Os10g34980	missense_variant	MODERATE
qSKC10.18	Chr10	18664307	G	A	LOC_Os10g34980	missense_variant	MODERATE
qSKC10.18	Chr10	18664336	A	G	LOC_Os10g34980	missense_variant	MODERATE
qSKC10.18	Chr10	18664432	C	T	LOC_Os10g34980	stop_gained	HIGH
qSKC10.18	Chr10	18664502	G	A	LOC_Os10g34980	missense_variant	MODERATE
qSKC10.18	Chr10	18664532	C	T	LOC_Os10g34980	missense_variant	MODERATE
qSKC10.18	Chr10	18664592	A	G	LOC_Os10g34980	missense_variant	MODERATE
qSKC10.18	Chr10	18664774	T	C	LOC_Os10g34980	missense_variant	MODERATE
qSKC10.18	Chr10	18666552	G	A	LOC_Os10g34990	missense_variant	MODERATE
qSKC10.18	Chr10	18666616	G	A	LOC_Os10g34990	missense_variant	MODERATE
qSKC10.18	Chr10	18666630	TCTTC	T	LOC_Os10g34990	frameshift_variant	HIGH
qSKC10.18	Chr10	18666647	A	ATGCT	LOC_Os10g34990	frameshift_variant	HIGH
qSKC10.18	Chr10	18666765	A	G	LOC_Os10g34990	missense_variant	MODERATE
qSKC10.18	Chr10	18666810	G	C	LOC_Os10g34990	missense_variant	MODERATE
qSKC10.18	Chr10	18666897	G	C	LOC_Os10g34990	missense_variant	MODERATE
qSKC10.18	Chr10	18668512	G	C	LOC_Os10g35000	missense_variant	MODERATE
qSKC10.18	Chr10	18669036	G	A	LOC_Os10g35000	missense_variant	MODERATE
qSKC10.18	Chr10	18671345	G	C	LOC_Os10g35010	missense_variant	MODERATE
qSKC10.18	Chr10	18674780	C	T	LOC_Os10g35010	missense_variant	MODERATE
qSKC10.18	Chr10	18675071	AC	A	LOC_Os10g35010	splice_region_variant&intron_variant	LOW
qSKC10.18	Chr10	18684310	C	T	LOC_Os10g35020	missense_variant	MODERATE
qSKC10.18	Chr10	18684531	G	GCC	LOC_Os10g35020	frameshift_variant	HIGH
qSKC10.18	Chr10	18684532	G	GCCGCCGC	LOC_Os10g35020	frameshift_variant	HIGH
qSKC10.18	Chr10	18684950	C	CGAG	LOC_Os10g35020	disruptive_inframe_insertion	MODERATE
qSKC10.18	Chr10	18689539	A	C	LOC_Os10g35030	missense_variant	MODERATE
qSKC10.18	Chr10	18693030	C	.	LOC_Os10g35030	missense_variant	MODERATE
qSKC10.18	Chr10	18697621	G	C	LOC_Os10g35040	missense_variant	MODERATE
qSKC10.18	Chr10	18698284	C	A	LOC_Os10g35040	missense_variant	MODERATE
qSKC10.18	Chr10	18698771	C	C	LOC_Os10g35040	missense_variant	MODERATE
qSKC10.18	Chr10	18699638	T	C	LOC_Os10g35040	missense_variant	MODERATE
qSKC10.18	Chr10	18714498	G	A	LOC_Os10g35080	missense_variant	MODERATE
qSKC10.18	Chr10	18714516	C	A	LOC_Os10g35080	missense_variant	MODERATE
qSKC10.18	Chr10	18715111	T	C	LOC_Os10g35080	splice_region_variant&intron_variant	LOW
qSKC10.18	Chr10	18715175	G	A	LOC_Os10g35080	missense_variant	MODERATE
qSKC10.18	Chr10	18715301	T	A	LOC_Os10g35080	missense_variant	MODERATE
qSKC10.18	Chr10	18724973	G	A	LOC_Os10g35100	missense_variant	MODERATE
qSKC10.18	Chr10	18725317	A	G	LOC_Os10g35100	5_prime_UTR_premature_start_codon_gain_variant	LOW
qSKC10.18	Chr10	18740242	G	C	LOC_Os10g35110	splice_region_variant&intron_variant	LOW
qSKC10.18	Chr10	18741379	T	TGTCCCATCCCA	LOC_Os10g35110	splice_region_variant	LOW
qSKC10.18	Chr10	18745637	C	CAAGAAG	LOC_Os10g35120	disruptive_inframe_insertion	MODERATE
qSKC10.18	Chr10	18745846	G	C	LOC_Os10g35120	missense_variant	MODERATE
qSKC10.18	Chr10	18748236	A	G	LOC_Os10g35130	missense_variant	MODERATE
qSKC10.18	Chr10	18748468	C	A	LOC_Os10g35130	missense_variant	MODERATE
qSKC10.18	Chr10	18749935	T	C	LOC_Os10g35130	missense_variant	MODERATE
qSKC10.18	Chr10	18756939	G	A	LOC_Os10g35150	missense_variant	MODERATE
qSKC10.18	Chr10	18757937	A	G	LOC_Os10g35150	splice_region_variant&intron_variant	LOW
qSKC10.18	Chr10	18769659	C	CTT	LOC_Os10g35160	frameshift_variant	HIGH
qSKC10.18	Chr10	18771052	A	A	LOC_Os10g35160	missense_variant	MODERATE
qSKC10.18	Chr10	18771071	C	C	LOC_Os10g35160	missense_variant	MODERATE
qSKC10.18	Chr10	18771485	C	C	LOC_Os10g35160	missense_variant	MODERATE
qSKC10.18	Chr10	18771686	C	T	LOC_Os10g35160	missense_variant	MODERATE
qSKC10.18	Chr10	18772316	C	.	LOC_Os10g35160	missense_variant	MODERATE
qSKC10.18	Chr10	18772387	A	A	LOC_Os10g35160	missense_variant	MODERATE
qSKC10.18	Chr10	18772438	G	A	LOC_Os10g35160	missense_variant	MODERATE
qSKC10.18	Chr10	18772532	C	.	LOC_Os10g35160	stop_gained	HIGH
[truncated: 218 more rows]
