# Supplementary material for: Genetic Dissection of Alkalinity Tolerance at the Seedling Stage in Rice (Oryza sativa) Using a High-Resolution Linkage Map
Source: Plants (Basel). 2022 Dec 2;11(23):3347. doi: 10.3390/plants11233347 (PMC9738157; doi:10.3390/plants11233347)
Supplement: Supplementary file 1 [file plants-11-03347-s001.zip › Table S5.xlsx]

## Sheet: Table S4
Table S5: List of candidates genes with high impact variants
QTL	Locus ID	Annotation
qSNC3.15	LOC_Os03g26980	expressed protein
qSNC3.15	LOC_Os03g27070	expressed protein
qSNC3.32	LOC_Os03g56290	expressed protein
qSNC3.32	LOC_Os03g56560	retrotransposon protein, putative, unclassified, expressed
qSNC3.32	LOC_Os03g56600	expressed protein
qSNC3.32	LOC_Os03g56760	expressed protein
qSNC3.32	LOC_Os03g56770	expressed protein
qSNC3.32	LOC_Os03g56830	ad-003, putative, expressed
qSNC3.32	LOC_Os03g56920	expressed protein
qSNC3.32	LOC_Os03g56942	hypothetical protein
qSNC3.32	LOC_Os03g57050	expressed protein
qSNC3.32	LOC_Os03g57380	retrotransposon protein, putative, unclassified, expressed
qSNC3.32	LOC_Os03g57390	hypothetical protein
qSNC3.32	LOC_Os03g58000	expressed protein
qSNC3.32	LOC_Os03g59264	calreticulin family protein, expressed			F
qSNC3.32	LOC_Os03g59730	No apical meristem protein, putative, expressed
qSNC3.32	LOC_Os03g59830	expressed protein
qSNC3.32	LOC_Os03g60660	expressed protein
qSNC3.32	LOC_Os03g61430	uncharacterized Cys-rich domain containing protein, putative, expressed
qSNC3.32	LOC_Os03g61770	expressed protein
qSNC3.32	LOC_Os03g61940	small heat shock protein, chloroplast precursor, putative, expressed
qSNC3.32	LOC_Os03g62070	hydrolase, putative, expressed
qSNC3.32	LOC_Os03g62370	WD40-like Beta Propeller Repeat family protein, expressed
qSNC3.32	LOC_Os03g62379	MYB family transcription factor, putative, expressed
qSNC3.32	LOC_Os03g62400	pentatricopeptide, putative, expressed
qSNC3.32	LOC_Os03g62430	OsWAK28 - OsWAK receptor-like protein kinase, expressed
qSNC3.32	LOC_Os03g62440	expressed protein
qSNC3.32	LOC_Os03g62522	expressed protein
qSNK8.01	LOC_Os08g01460	expressed protein
qSNK8.01	LOC_Os08g01470	cytochrome P450, putative, expressed
qSNK8.01	LOC_Os08g01514	expressed protein
qSNK8.01	LOC_Os08g01560	expressed protein
qSNK8.01	LOC_Os08g01580	NBS-LRR disease resistance protein, putative, expressed
qSNK8.01	LOC_Os08g01640	Rf1, mitochondrial precursor, putative, expressed
qSNK8.01	LOC_Os08g01720	expressed protein
qSNK8.01	LOC_Os08g01760	dehydrogenase, putative, expressed
qSNK8.01	LOC_Os08g01810	matrix attachment region binding protein, putative, expressed
qSNK8.01	LOC_Os08g01830	TKL_IRAK_CR4L.6 - The CR4L subfamily has homology with Crinkly4, expressed
qSNK8.01	LOC_Os08g01990	expressed protein
qSNK8.01	LOC_Os08g02050	protein kinase family protein, putative, expressed
qSNK8.01	LOC_Os08g02060	expressed protein
qSNK8.01	LOC_Os08g44060	hypothetical protein
qSNK8.01	LOC_Os08g44470	expressed protein
qSNK8.01	LOC_Os08g44690	transposon protein, putative, Pong sub-class, expressed
qSKC9.22	LOC_Os09g39090	vignain precursor, putative, expressed
qSKC9.22	LOC_Os09g39100	cysteine proteinase EP-B 1 precursor, putative, expressed
qSKC10.18	LOC_Os10g34490	phosphate translocator-related, putative, expressed
qSKC10.18	LOC_Os10g34650	retrotransposon protein, putative, unclassified, expressed
qSKC10.18	LOC_Os10g34795	expressed protein
qSKC10.18	LOC_Os10g34896	RIPER8 - Ripening-related family protein precursor
qSKC10.18	LOC_Os10g34960	ubiquitin family protein, putative, expressed
qSKC10.18	LOC_Os10g34980	expressed protein
qSKC10.18	LOC_Os10g34990	ubiquitin-carboxyl extension, putative, expressed
qSKC10.18	LOC_Os10g35160	expressed protein
qSKC10.18	LOC_Os10g35170	semialdehyde dehydrogenase, NAD binding domain containing protein, putative, expressed
qSKC10.18	LOC_Os10g35330	expressed protein
qSKC10.18	LOC_Os10g35604	expressed protein
qSKC10.18	LOC_Os10g35640	Rf1, mitochondrial precursor, putative, expressed
qSKC10.18	LOC_Os10g35650	expressed protein
qSKC10.18	LOC_Os10g35730	pentatricopeptide repeat domain containing protein, putative, expressed
qSKC10.18	LOC_Os10g35740	hypothetical protein
qSKC10.18	LOC_Os10g36050	hypothetical protein
qSKC10.18	LOC_Os10g36130	hypothetical protein
