# Supplementary material for: Genetic Dissection of Alkalinity Tolerance at the Seedling Stage in Rice (Oryza sativa) Using a High-Resolution Linkage Map
Source: Plants (Basel). 2022 Dec 2;11(23):3347. doi: 10.3390/plants11233347 (PMC9738157; doi:10.3390/plants11233347)
Supplement: Supplementary file 1 [file plants-11-03347-s001.zip › Table S6.xlsx]

## Sheet: Table S5
Table S6. List of primers used for gene expression by quantitative real-time reverse transcription PCR (qRT-PCR)
Locus_ID	Annotation	Forward_primer	Reverse_primer	Amplicon_Size
LOC_Os03g59730	No apical meristem protein, putative, expressed	TGACCGCAAAACATGTGACA	AACCTCCATCCGGTTTGCTA	103
LOC_Os03g62370	WD40-like Beta Propeller Repeat family protein, expressed	GGCGTCTCCGTCAACTACAA	CGGGGAGAGGTAGAGGTTGA	99
LOC_Os03g62379	MYB family transcription factor, putative, expressed	GTCGAAGAGAAGGAGCACGT	AGGTCGTCAGTAATGTTCGCA	107
LOC_Os03g62430	OsWAK28 - OsWAK receptor-like protein kinase, expressed	TCTTCACAGTTTCCTCGCTGA	TCGATTGGTCTGTGCCATTCA	108
LOC_Os08g02050	protein kinase family protein, putative, expressed	GCTGAACCCTCTGACAGACC	TTAGCGCCATTCACCACAGT	116
LOC_Os08g44690	transposon protein, putative, Pong sub-class, expressed	AAATCAGCCTCTCAGTGCCC	ACCAAGAGCTGAGGAGTCGT	149
LOC_Os09g39100	cysteine proteinase EP-B 1 precursor, putative, expressed	CTGCTGTTGCTGCCTACTGA	AACCCCGATGGCCTAAACG	150
LOC_Os10g34490	phosphate translocator-related, putative, expressed	TGTCGCTCTGATGCTCAAGG	GTGGTGGAAGGAGTCGGTG	82
LOC_Os10g34650	retrotransposon protein, putative, unclassified, expressed	AATGATGAGAGAGCCGCCAG	AATCGAGAACCAACCGCAGT	108
LOC_Os10g35170	Semialdehyde dehydrogenase, NAD binding domain containing protein	TGCCATTTCAACAAACATGG	GCCGTATTGATGTTAGAAGG	118
LOC_Os03g08010	Elongation factor 1 alpha (EF1α)	TTGATCTGGTCAAGAGCCTCAAGC	TCTCTGGGTTTGAGGGTGACAACA	94
